# Supplementary material for: Immune Pathways with Aging Characteristics Improve Immunotherapy Benefits and Drug Prediction in Human Cancer
Source: MDPI journal article supplement (doi:10.3390/cancers15020342), 2023-01-04
Supplement: s1 [file s1]

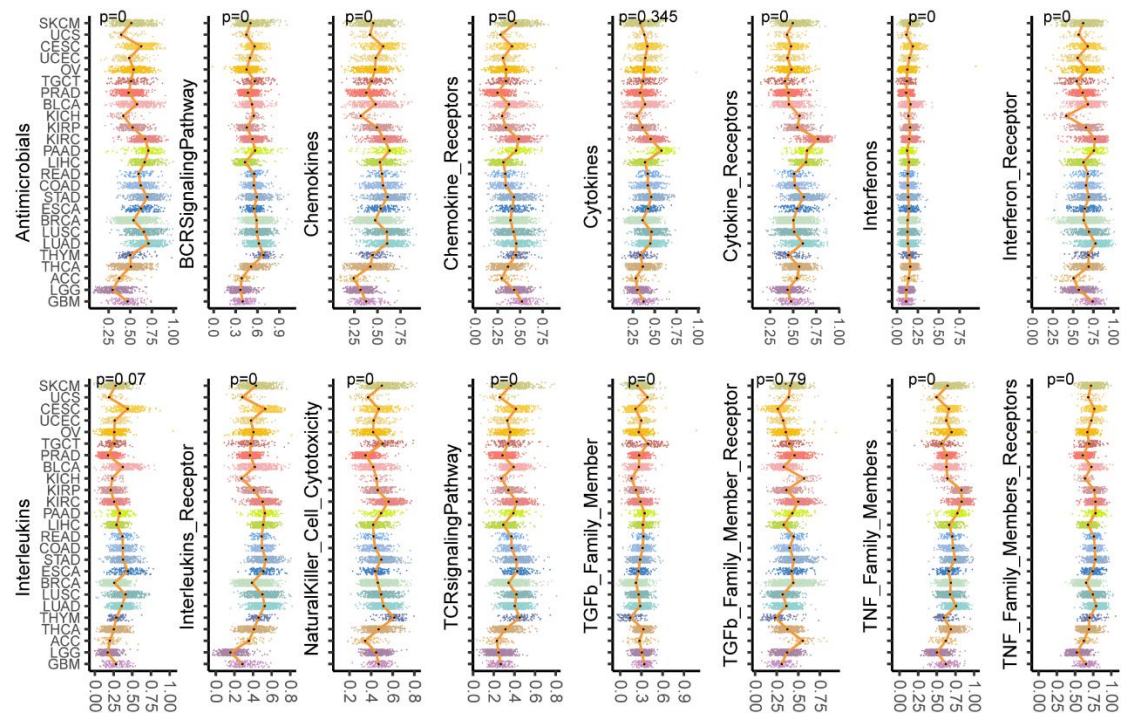

**Supplementary Figure S1. Normalized IRP scores across 25 cancer types.**

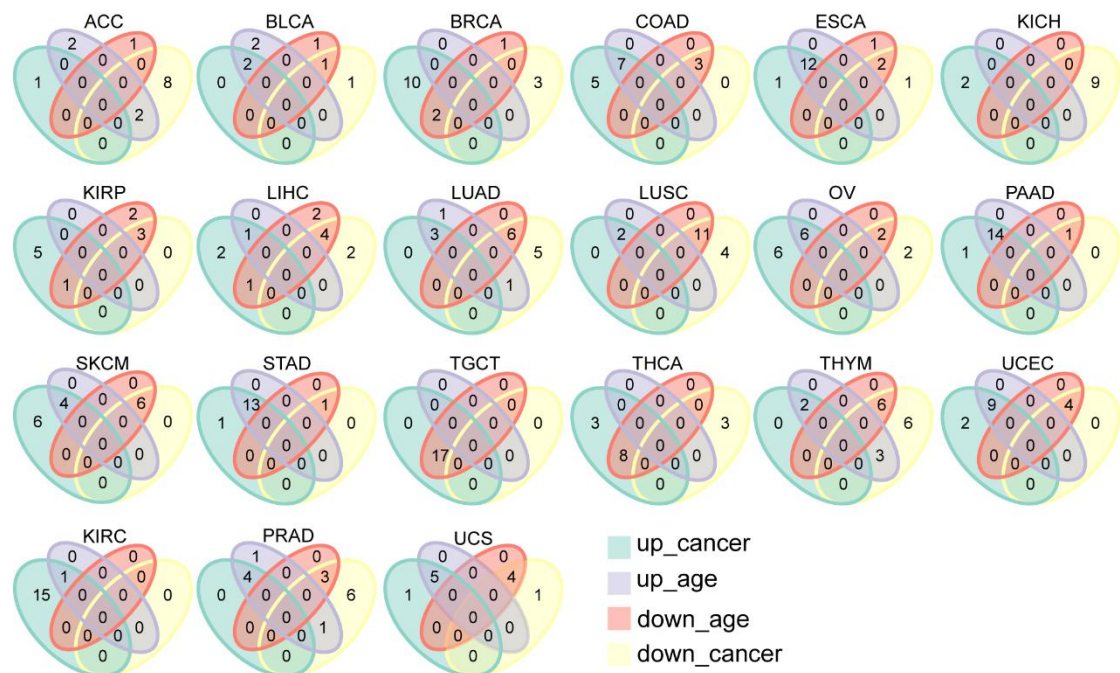

**Supplementary Figure S2. Venn diagrams showing the overlap between dysregulated tumor- and age- IRPs.**

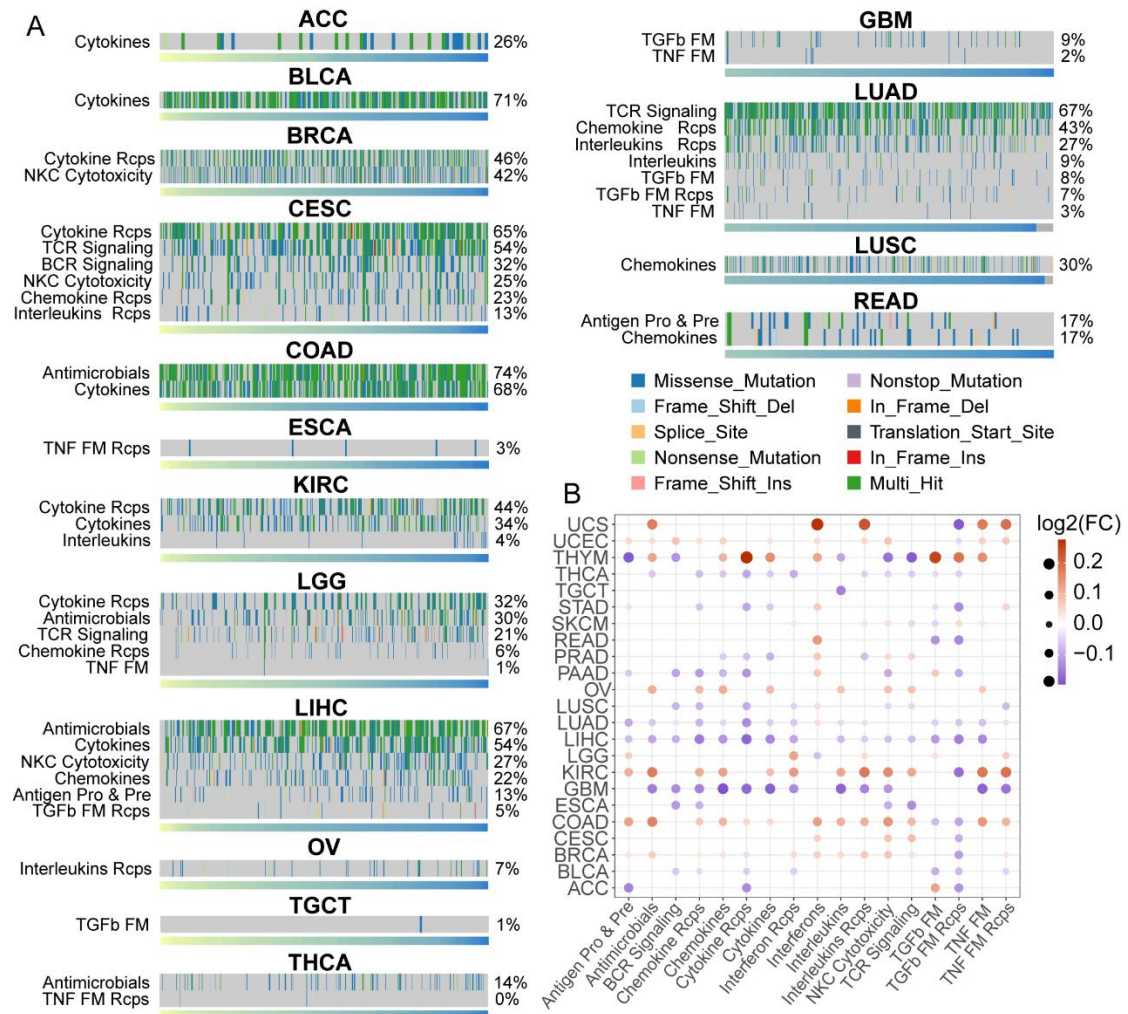

**Supplementary Figure S3. A** Oncoplot of IRPs in different cancers. **B** Dotplot of associations between IRP scores and mutations in IRPs across various cancers.

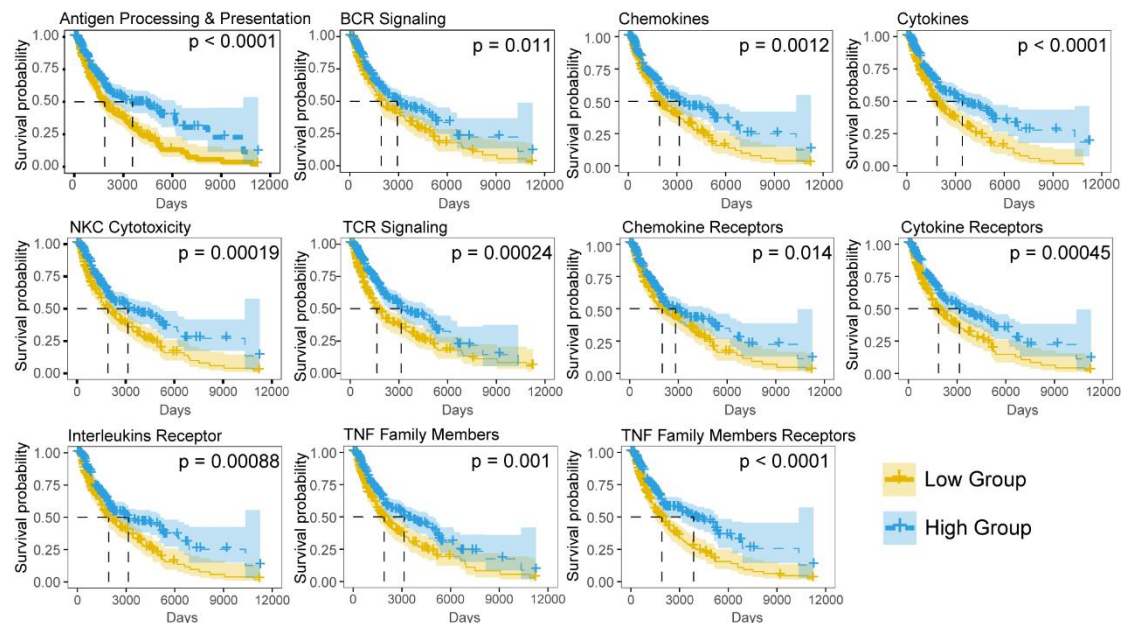

**Supplementary Figure S4. KM curves of IRPs in SKCM.**



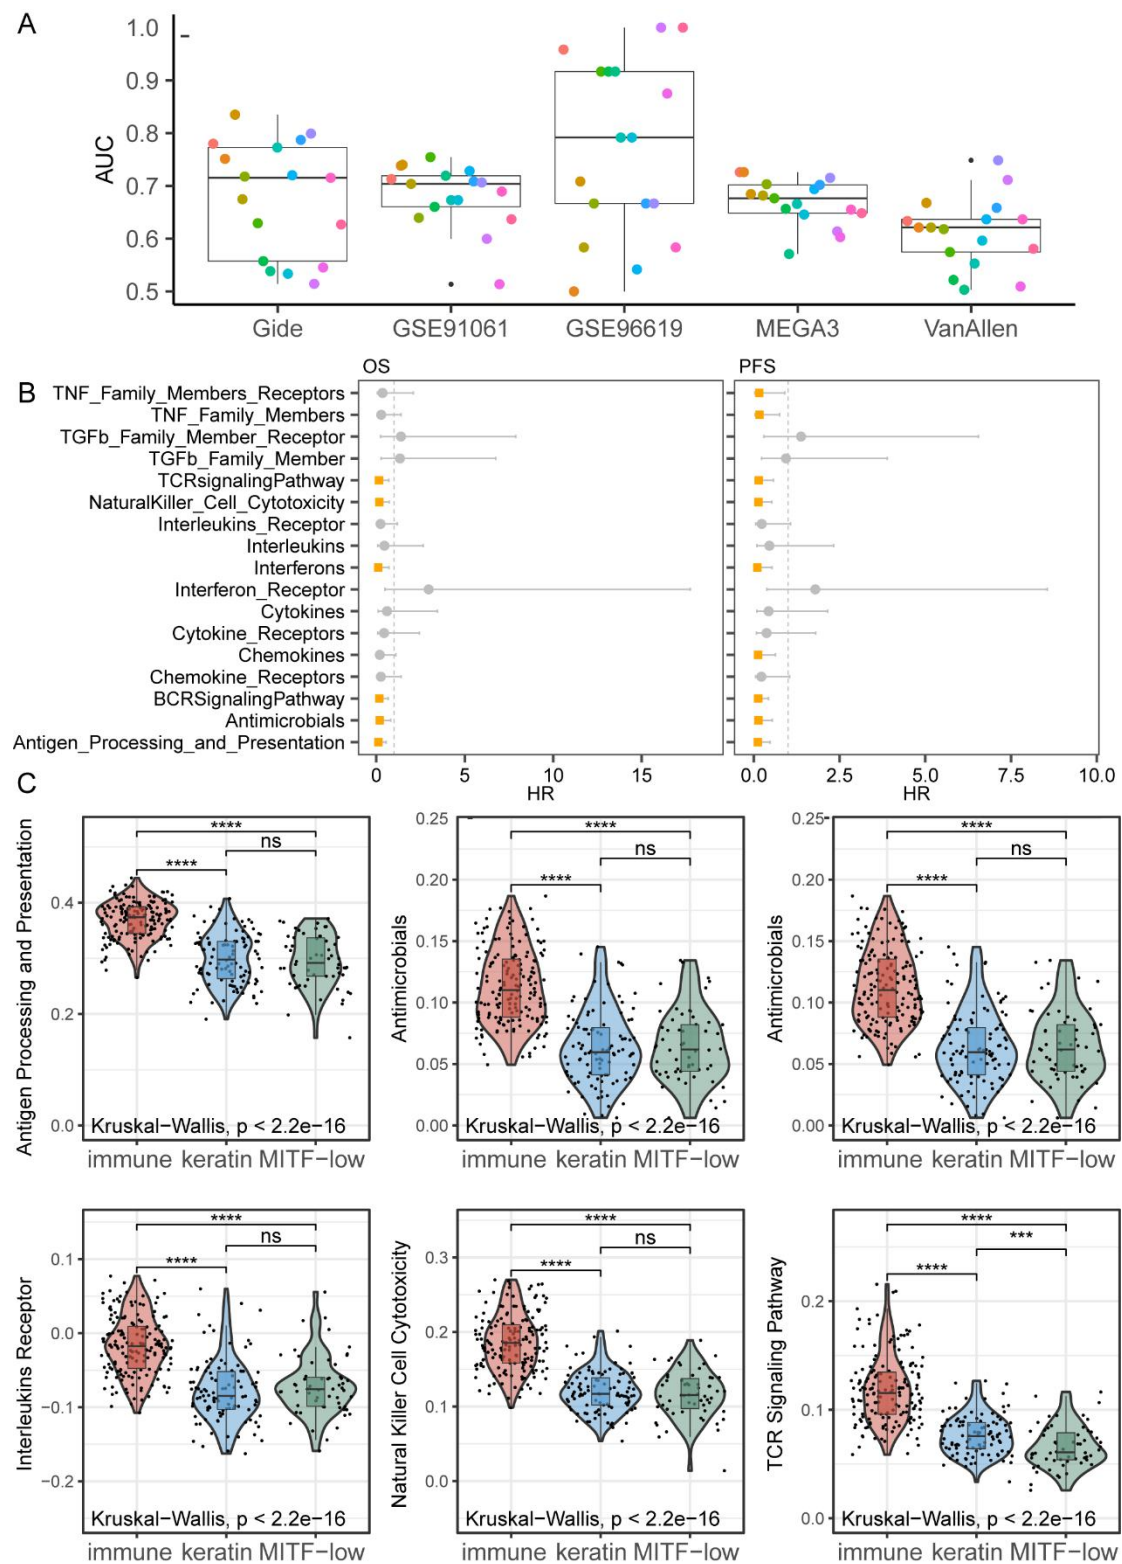

**Supplementary Figure S5.** **A** Boxplots of the area under the ROC curve (AUCs) in 5 cohorts. **B** Forest plot showing the results of Univariate Cox regression of OS and PFS in Gide cohort. Rectangle dots represent hazard ratio (HR) and the error bars show the 95% confidence intervals of the HR. Orange denotes statistically significant. **C** IRP scores among three SKCM phenotype.

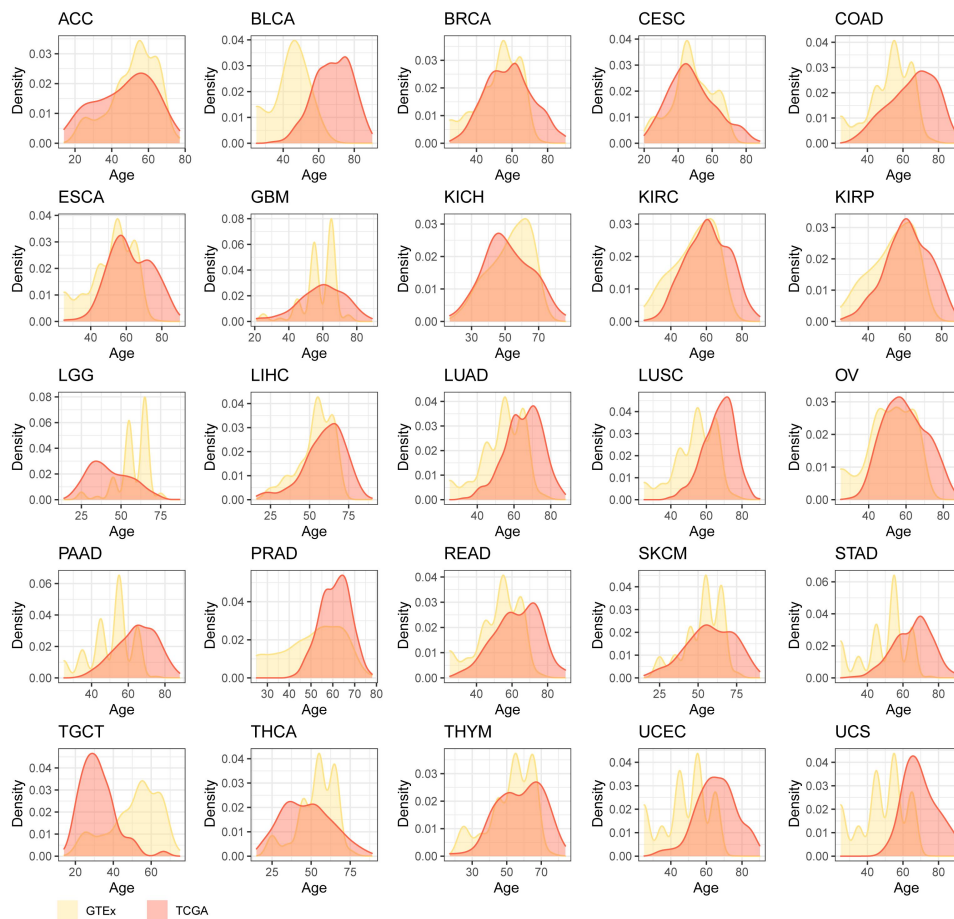

**Supplementary Figure S6. Age distribution of samples from TCGA and GTEx samples.**

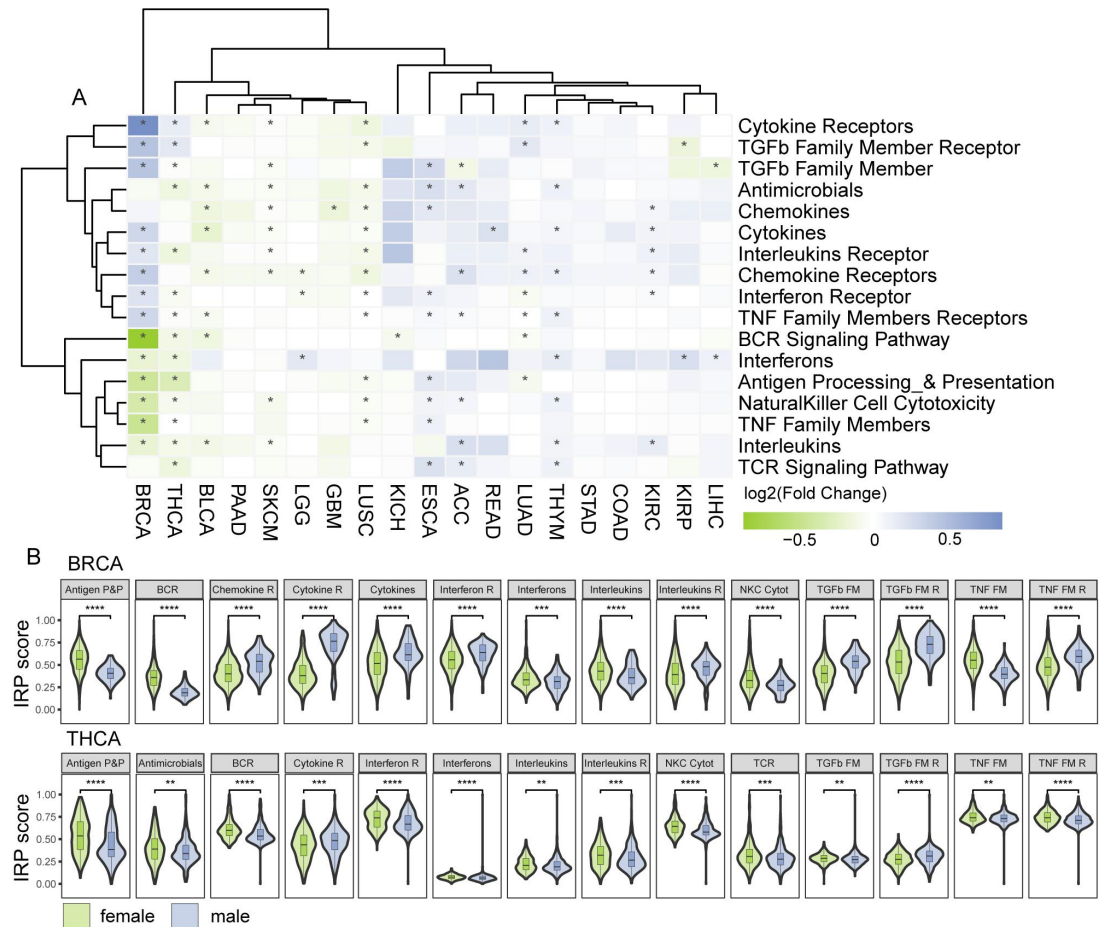

**Supplementary Figure S7. Gender-related differences of IRPs.** A Heatmap showing IRP expression level dysregulated in different gender groups across 19 cancer types (Only cancer patients with more than one gender). '\*' denotes a significant dysregulation. B Boxplot showing the IRP differences between males and females in BRCA and THCA (wilcox.test  $p < 0.05$ ).
