# Supplementary material for: Immune Pathways with Aging Characteristics Improve Immunotherapy Benefits and Drug Prediction in Human Cancer
Source: Cancers (Basel). 2023 Jan 4;15(2):342. doi: 10.3390/cancers15020342 (PMC9856581; doi:10.3390/cancers15020342)
Supplement: Supplementary file 1 [file cancers-15-00342-s001.zip › Supplementary tables.xlsx]

## Sheet: Table S1
Table S1. Dysregulated IRPs in tumor across 25 cancer types
pathway	ACC		BLCA		BRCA		CESC		COAD		ESCA		GBM		KICH		KIRC		KIRP		LGG		LIHC		LUAD		LUSC		OV		PAAD		PRAD		READ		SKCM		STAD		TGCT		THCA		THYM		UCEC		UCS
	logFC	adj.P	logFC	adj.P	logFC	adj.P	logFC	adj.P	logFC	adj.P	logFC	adj.P	logFC	adj.P	logFC	adj.P	logFC	adj.P	logFC	adj.P	logFC	adj.P	logFC	adj.P	logFC	adj.P	logFC	adj.P	logFC	adj.P	logFC	adj.P	logFC	adj.P	logFC	adj.P	logFC	adj.P	logFC	adj.P	logFC	adj.P	logFC	adj.P	logFC	adj.P	logFC	adj.P	logFC
Antigen_Processing_and_Presentation	-0.0517658	0.0644308	0.0959369	0.241939	0.170978	1.00757e-49	0.240327	0.000142982	0.129624	2.66051e-22	0.160759	2.32456e-22	0.467917	1.35424e-123	0.0436389	0.349396	0.391813	1.31968e-39	0.154963	2.19304e-06	0.297602	2.76819e-86	0.241182	1.02438e-35	0.0851583	4.7848e-15	-0.0696929	1.06413e-10	0.350558	9.52221e-56	0.474289	5.47238e-103	0.117961	6.90315e-14	0.160167	1.48617e-11	0.140701	1.54615e-83	0.252816	1.45217e-48	0.437471	1.85154e-95	0.253865	1.57529e-76	0.151188	3.50302e-19	0.16099	1.61953e-10	0.00756624
Antimicrobials	-0.140987	3.01687e-11	0.0830552	0.249762	-0.00228528	0.855898	0.302706	1.82196e-06	0.161131	1.40331e-26	0.168172	1.63808e-29	0.39835	1.45398e-96	-0.231108	8.14872e-07	0.249282	6.91098e-16	0.00640659	0.902615	0.194993	1.37227e-56	-0.0244768	0.171499	-0.122696	7.2675e-27	-0.181167	2.1721e-52	0.180759	2.17029e-17	0.395791	3.52255e-85	-0.0151772	0.323751	0.155979	1.81815e-12	0.0418347	2.84141e-07	0.291245	1.44706e-63	0.493065	6.11114e-100	0.0482712	8.59491e-05	-0.515056	8.72214e-152	0.109302	2.8843e-07	-0.0178761
BCRSignalingPathway	0.0189406	0.18385	0.0459313	0.378348	0.185882	6.17665e-68	0.346323	4.87594e-10	0.0785907	1.05598e-11	0.029859	5.99574e-05	0.131061	2.8114e-34	0.134624	1.17796e-06	0.105845	1.62086e-08	0.0251535	0.307659	0.0673846	2.07463e-16	0.0670523	8.36322e-06	0.0619594	1.10563e-22	0.0360456	2.64001e-08	0.267489	3.15267e-60	0.203396	1.00056e-63	0.0896756	1.15278e-11	0.0827979	4.26897e-05	-0.04011	9.85076e-07	0.143511	1.09309e-49	0.437848	9.40473e-96	0.120565	1.9378e-52	-0.370784	1.52893e-123	0.31868	1.53916e-46	0.250302
Chemokine_Receptors	-0.105101	3.1028e-12	-0.0472076	0.402031	-0.132803	4.21093e-33	-0.095791	0.0791988	-0.0975447	1.69786e-25	-0.0211175	0.0341833	0.283384	5.96897e-90	-0.0115586	0.721049	0.204686	1.12443e-20	0.0451513	0.105869	0.174512	2.70184e-85	0.0165776	0.414817	-0.283465	2.03267e-161	-0.317125	6.33998e-175	-0.0712769	4.73959e-08	0.199735	7.9887e-44	-0.247714	3.43377e-58	-0.103471	8.16506e-15	0.063098	4.51097e-12	0.0615879	1.75711e-06	0.342834	1.06767e-65	-0.0428773	1.34289e-08	-0.628751	1.80192e-250	-0.323534	7.8408e-36	-0.399514
Chemokines	-0.106878	2.00684e-08	0.150373	0.0698089	-0.0749607	1.69522e-08	0.253773	3.1073e-05	0.175719	4.21566e-32	0.133671	1.46081e-15	0.236552	8.94681e-46	-0.277774	1.9154e-12	0.123079	9.34634e-06	-0.00270243	0.93139	0.12644	2.59463e-40	-0.0276305	0.175553	-0.12667	5.60284e-32	-0.122324	1.26766e-34	0.292141	8.33673e-40	0.410552	1.52714e-69	-0.0512405	0.00145187	0.18087	1.82954e-17	0.0232909	0.0031539	0.267955	1.21953e-57	0.553017	5.81575e-124	0.0254592	0.0506961	-0.0930403	3.85397e-09	0.251153	1.08743e-22	0.183438
Cytokine_Receptors	-0.270382	3.86333e-30	-0.201269	0.000158926	-0.374406	9.70801e-202	-0.382597	2.51001e-13	-0.186167	6.64237e-60	0.0377088	0.0140054	0.180601	2.32279e-30	-0.188696	2.1426e-06	0.198608	2.26253e-13	-0.215458	7.66533e-10	0.100453	1.15006e-22	-0.176373	9.98532e-30	-0.378988	1.77044e-212	-0.469949	3.49863e-252	-0.14395	1.11836e-16	0.152597	4.03937e-18	-0.257288	4.33576e-56	-0.1942	5.60301e-34	-0.164088	1.31125e-105	-0.0168927	0.294771	0.43666	1.06249e-70	-0.152582	4.38128e-40	-0.43854	5.98103e-151	-0.446249	4.48412e-68	-0.434729
Cytokines	-0.047004	0.000892995	0.132974	0.0832807	-0.175643	1.17293e-36	0.0977838	0.0885624	0.0352342	0.000185774	0.0519731	6.29424e-08	0.125178	7.03821e-36	-0.133031	2.29697e-06	0.0555363	0.00127381	-0.0535408	0.00429218	0.0454138	2.75662e-15	-0.0496857	0.0020596	-0.0882349	6.35615e-31	-0.075431	1.99517e-21	0.100761	6.03366e-20	0.217792	8.982e-54	-0.109986	1.43299e-12	0.0504531	0.000342599	-0.0480768	9.29786e-10	0.095521	2.01404e-19	0.451743	4.96583e-93	0.00450324	0.522955	-0.141085	4.0257e-22	0.18867	4.80431e-16	0.245723
Interferon_Receptor	-0.0394095	0.0626958	0.138104	0.0531114	-0.100417	1.13722e-17	0.205669	0.00014317	0.157888	1.04163e-48	0.13022	1.69663e-30	0.404322	2.74544e-123	-0.127857	0.00276317	0.299996	1.31968e-39	0.19856	6.57894e-14	0.249965	2.35563e-94	0.111761	4.56473e-07	0.0246527	0.00106794	-0.0609508	3.98512e-13	0.171801	5.67176e-24	0.314021	2.39876e-85	0.140394	2.45808e-16	0.173049	7.37708e-25	0.117252	3.7494e-48	0.201902	1.03401e-65	0.352163	5.59982e-65	0.109016	3.50522e-40	-0.383199	7.28257e-138	0.043528	0.0652423	0.0737501
Interferons	0.0204915	0.0644308	0.0612945	0.29264	0.0657267	8.5184e-12	0.165382	0.00085348	0.0134676	0.0503317	-0.00191225	0.77708	-0.0519358	1.05829e-16	-0.023148	0.377879	-0.0133454	0.176452	-0.00641049	0.677526	-0.0499794	9.35457e-45	0.00795897	0.643044	-0.00285994	0.431794	-0.00717428	0.040428	-0.00697349	0.252306	0.00185376	0.826744	-0.0285839	0.0422447	0.00556336	0.633696	0.176631	2.70595e-166	-0.00782448	0.188883	0.395513	5.03673e-80	0.0245508	1.12499e-13	-0.280636	4.71264e-55	0.13622	3.52123e-11	-0.0261771
Interleukins	-0.010321	0.417774	0.23173	0.000158926	0.0559876	3.32825e-06	0.302051	2.24416e-07	0.148855	1.96205e-50	-0.052794	9.79188e-05	0.181627	2.42625e-54	-0.00123323	0.965947	0.0335452	0.0334326	-0.0186481	0.307659	0.0688173	2.43106e-26	-0.00658705	0.675103	-0.0397639	5.29868e-08	0.0228028	0.00620794	0.128284	1.2849e-32	0.190104	1.17589e-50	-0.042534	0.00263328	0.147109	2.23172e-23	-0.24913	6.86201e-197	0.139451	3.59477e-37	0.190053	5.11117e-25	0.0459973	2.51373e-12	-0.217069	9.54791e-67	0.154711	1.87821e-13	0.0497679
Interleukins_Receptor	-0.0664378	1.08303e-05	0.0993772	0.192924	-0.104696	8.03448e-15	0.203908	0.000448894	0.09016	4.67918e-11	-0.0716527	6.48678e-10	0.204733	1.95695e-46	-0.237905	2.07253e-12	0.110775	1.81796e-05	-0.03811	0.223139	0.047573	2.76766e-08	-0.18191	1.02438e-35	-0.270743	2.05222e-128	-0.291532	3.18962e-129	0.177366	1.02989e-30	0.166537	6.49027e-34	-0.0812267	4.06838e-12	0.0858096	0.000168939	-0.161142	6.92865e-88	0.102697	1.1381e-15	0.349122	1.16239e-78	0.0608847	5.1559e-09	-0.692203	4.32293e-298	0.00108379	0.953357	-0.215525
NaturalKiller_Cell_Cytotoxicity	-0.0598711	0.00036806	0.0312812	0.616237	0.0700751	5.1816e-08	0.200197	0.000397023	0.0372525	1.86661e-05	0.0865651	2.5118e-21	0.169013	2.42396e-52	0.0345144	0.23954	0.198226	2.87208e-26	0.0680235	0.000580955	0.122505	2.03226e-69	-0.0164904	0.346584	-0.136493	2.79296e-77	-0.16742	1.42744e-101	0.202386	4.36097e-43	0.213759	8.88604e-68	-0.0758126	4.44114e-08	0.0230059	0.0729083	0.226378	2.29181e-121	0.121383	3.54571e-33	0.487761	1.20576e-113	0.0756935	2.37366e-23	-0.471611	2.04579e-168	0.121614	3.63646e-08	-0.00305628
TCRsignalingPathway	-0.0952212	8.59377e-06	0.0825887	0.192989	0.00285497	0.815636	0.256819	2.55978e-06	0.0769992	1.10434e-13	0.116608	3.96404e-20	0.366464	1.43792e-88	-0.0654622	0.0465356	0.204308	4.41433e-14	0.0756239	0.00698277	0.261005	1.10886e-100	-0.0817531	6.43153e-07	-0.128332	5.95244e-27	-0.0719752	1.10574e-16	0.251563	3.54978e-28	0.210861	8.982e-54	-0.00700837	0.588032	0.0565894	0.000244154	0.00499149	0.508783	0.157023	8.04739e-35	0.36692	1.85154e-95	0.0142786	0.173984	-0.411937	1.2313e-103	0.119849	3.14039e-08	-0.053638
TGFb_Family_Member	0.0505841	0.000399215	-0.121185	0.0531114	-0.123819	1.76097e-26	-0.202908	3.12868e-05	0.00122215	0.860313	0.117222	1.54801e-33	0.148343	1.04932e-52	-0.090427	0.000629204	0.0387745	0.0163506	-0.0196534	0.307659	0.111995	2.20402e-65	-0.0936018	6.43153e-07	-0.049967	5.94789e-16	-0.073032	7.29641e-31	-0.0472809	1.96369e-05	0.0371265	4.01646e-05	-0.17579	5.16391e-25	0.0295477	0.0155026	0.0709995	1.75128e-18	0.0474571	8.40002e-08	0.359837	4.6708e-43	0.0277977	3.8781e-09	0.11767	3.62899e-13	-0.0697547	0.0022267	0.190965
TGFb_Family_Member_Receptor	-0.0376108	0.0261169	-0.425419	4.22908e-13	-0.200972	1.61166e-44	-0.480411	1.11114e-25	-0.183438	5.7877e-68	0.091951	7.46068e-16	0.0750181	2.1334e-13	0.163008	1.17796e-06	0.0739081	0.00278824	-0.0804615	0.000579863	0.150156	5.62423e-69	-0.0309529	0.139281	-0.241807	3.07677e-160	-0.289599	9.0081e-207	-0.266792	2.33078e-79	-0.075199	5.1943e-10	0.0159541	0.374505	-0.137352	8.32459e-19	-0.148608	3.71903e-59	-0.051117	3.81763e-05	0.350556	4.23906e-60	-0.0871765	1.67919e-40	-0.101864	7.31544e-13	-0.333317	1.94395e-51	-0.295622
TNF_Family_Members	-0.0576301	0.00100817	0.0902893	0.119534	0.164133	2.26519e-46	0.174151	0.000472506	0.150967	2.03936e-65	0.086197	8.701e-24	0.160974	6.90278e-38	-0.0638939	0.0465356	0.164097	9.44694e-21	0.166772	2.53294e-20	0.0040753	0.621005	-0.0653359	0.000368483	-0.0171741	0.00516137	-0.104707	6.29845e-48	0.123816	4.81469e-23	0.267894	3.38124e-80	0.0814187	1.93633e-11	0.139432	1.36423e-32	0.260369	3.14388e-155	0.163888	8.37478e-82	0.395465	5.1991e-83	0.0361038	4.62616e-11	-0.552871	2.83193e-180	0.172175	1.92372e-16	-0.0887584
TNF_Family_Members_Receptors	0.0188412	0.116154	0.214856	0.000158926	-0.142073	1.02411e-31	0.349541	3.61527e-09	0.0988981	1.65301e-30	0.0598433	7.82712e-13	0.149612	7.62528e-45	-0.0476289	0.0716302	0.0927904	1.20993e-12	0.0821736	1.63256e-07	0.010297	0.200333	0.0871239	2.33877e-06	0.00264325	0.602839	-0.0394495	2.16789e-11	0.0884973	7.3986e-23	0.174161	4.57496e-66	-0.155955	6.20211e-25	0.0867605	1.74861e-09	0.0466525	6.08079e-09	0.107889	2.3605e-44	0.44294	1.05695e-99	0.0510826	1.11495e-18	-0.398467	4.95883e-98	0.224734	6.30634e-23	0.156808
* p < 0.05
[truncated: 1 more columns]

## Sheet: Table S2
Table S2. Dysregulated IRPs with age across 25 cancer types
pathway	ACC		BLCA		BRCA		CESC		COAD		ESCA		GBM		KICH		KIRC		KIRP		LGG		LIHC		LUAD		LUSC		OV		PAAD		PRAD		READ		SKCM		STAD		TGCT		THCA		THYM		UCEC		UCS
	logFC	P-value	logFC	P-value	logFC	P-value	logFC	P-value	logFC	P-value	logFC	P-value	logFC	P-value	logFC	P-value	logFC	P-value	logFC	P-value	logFC	P-value	logFC	P-value	logFC	P-value	logFC	P-value	logFC	P-value	logFC	P-value	logFC	P-value	logFC	P-value	logFC	P-value	logFC	P-value	logFC	P-value	logFC	P-value	logFC	P-value	logFC	P-value	logFC
Antigen_Processing_and_Presentation	0.000404215	0.666605	0.000181325	0.841188	0.000672924	0.0320257	-0.000304912	0.697267	0.00169108	0.000351399	0.00333749	5.26492e-08	0.00338788	0.00396741	-0.000823503	0.558686	0.000820319	0.146932	0.0003386	0.645128	-0.00336589	4.79228e-10	0.00169367	0.00967191	0.00286118	2.86887e-11	-0.00112412	0.0103296	0.001813	0.0200634	0.00973176	6.05785e-20	0.0029119	3.2338e-06	0.000308832	0.686768	0.000606768	0.0310199	0.00453973	2.15577e-13	-0.00868877	2.83741e-22	-0.00236169	1.15862e-06	0.00217954	0.00025174	0.00127105	0.130896	0.000126994
Antimicrobials	0.00115531	0.124258	0.00110669	0.176363	-0.000604002	0.0675262	-0.00096038	0.220718	0.0016561	0.00231256	0.00313208	2.532e-08	0.00231782	0.0306877	0.000535458	0.738703	0.000995305	0.0750292	-0.00106121	0.174686	-0.00252412	2.18569e-09	-0.000273327	0.588714	-0.000522904	0.261353	-0.00312139	8.44797e-10	0.000606523	0.379279	0.00804894	1.19926e-17	0.00100465	0.0770043	-0.000891477	0.212135	-0.000177288	0.541743	0.00601953	6.79439e-22	-0.0100626	3.02852e-25	-0.000889294	0.0240481	-0.000988024	0.283957	0.00144247	0.037642	0.000217435
BCRSignalingPathway	0.000987691	0.0406708	6.66778e-05	0.913525	0.000174397	0.551808	0.000100144	0.886878	-7.80945e-05	0.845051	0.00049851	0.0625055	0.00041024	0.420123	-0.000725387	0.446904	0.000179844	0.589855	-0.000752334	0.141012	-0.00174606	3.32923e-11	-0.000257358	0.584677	0.001659	6.96284e-11	0.00140224	7.80255e-08	0.00220172	0.000127373	0.00410471	1.58076e-14	0.00294612	2.20938e-08	-0.00114821	0.0699719	-0.000760023	0.00905047	0.00251807	4.33717e-13	-0.0091102	1.08449e-24	-0.00124829	4.09633e-06	-0.00257722	0.000208425	0.00584997	4.6578e-13	0.00570833
Chemokine_Receptors	0.000500301	0.349613	0.000572535	0.408297	-0.000588126	0.047284	0.000299086	0.665092	-0.00174316	1.27034e-07	-0.000139505	0.697008	0.00131322	0.0922358	-0.00030299	0.749911	0.000373361	0.351414	-0.000158011	0.778714	-0.00298984	1.20513e-21	-0.00128396	0.0279766	-0.00414138	9.69401e-17	-0.00629274	2.73214e-30	-0.00065584	0.113397	0.00357212	5.45186e-09	-0.00240401	0.000340244	-0.00142011	0.000981084	-0.000318485	0.328302	0.000843033	0.0523874	-0.00656732	1.87201e-16	-4.80825e-05	0.844195	-0.00367895	0.000349664	-0.00664686	2.43507e-13	-0.00835339
Chemokines	0.00059568	0.368026	0.00237064	0.00746032	-0.00139372	6.43433e-05	-0.00140041	0.0630526	0.00205332	0.000129092	0.00314614	2.97951e-07	0.00144343	0.0800974	0.000732597	0.613635	0.000500521	0.307677	-0.000640302	0.380607	-0.00197167	5.54697e-10	-0.000176187	0.765581	-0.00110328	0.0126331	-0.00163944	9.06684e-05	0.00191875	0.0104234	0.00802692	1.92082e-14	0.000714321	0.252737	-0.000106355	0.878611	-4.21071e-05	0.88017	0.0052552	3.2633e-18	-0.0113145	1.18659e-29	-0.000379442	0.35536	0.00197399	0.000307062	0.00360544	4.20235e-05	0.00414924
Cytokine_Receptors	0.00171676	0.0675695	-0.000345626	0.584071	-0.00183879	1.17506e-06	-0.000321429	0.633525	-0.00363319	4.00499e-18	0.00230163	2.2409e-05	0.0021679	0.0032325	0.000149189	0.914063	0.000405268	0.405891	-0.00227208	0.00443777	-0.00142958	2.04746e-05	-0.00119203	0.0229869	-0.00515379	6.67123e-17	-0.00918183	1.07479e-35	-0.00153144	0.00629215	0.00272409	0.000102377	-0.00311073	1.12465e-05	-0.00298952	2.35204e-08	-0.00175101	3.1337e-09	-0.00062105	0.253395	-0.008278	4.21723e-18	3.17159e-05	0.935332	-0.000809656	0.304396	-0.0085792	2.44587e-18	-0.00943978
Cytokines	0.000161359	0.733896	0.00230818	0.00547925	-0.00197787	1.12166e-07	-0.00214119	0.00335796	0.000163336	0.612558	0.000927191	0.00783428	0.000909021	0.0566886	0.000467744	0.632289	9.93514e-05	0.74261	-0.000816018	0.044132	-0.000561559	0.00262967	-0.00101082	0.0408828	-0.000595459	0.0579043	-0.000657819	0.045347	0.000676687	0.0596797	0.00396521	1.11822e-10	-0.000379007	0.541894	8.04578e-05	0.85668	-0.000859639	0.0020455	0.00170746	2.85066e-06	-0.00907206	5.34854e-25	8.03089e-06	0.9719	0.00136548	0.00888462	0.00257214	0.00116728	0.00542179
Interferon_Receptor	0.000376504	0.583318	-3.38376e-05	0.96392	-0.00110979	0.000328466	-0.000623939	0.360953	0.00209787	1.22526e-07	0.00225051	1.53394e-07	0.0016541	0.105312	-0.000231172	0.869675	0.00106558	0.0144341	-0.000677288	0.277052	-0.00351041	6.8362e-16	-0.00203035	0.00280577	0.00113792	0.000113631	-0.000437853	0.200376	0.000981106	0.0791917	0.00586875	6.02237e-15	0.00186625	0.00664718	0.00183482	0.00101355	6.85804e-05	0.819105	0.00434864	2.19332e-24	-0.00711852	3.26009e-18	-0.00161071	5.12947e-09	-0.00295177	2.35952e-05	0.000728323	0.348898	0.00138515
Interferons	-0.000854407	0.0180401	-0.00165131	0.0140722	0.000529549	0.0397219	-0.0012998	0.0418723	0.000340724	0.144835	-0.000591439	0.0154563	-0.000308345	0.266753	0.000351535	0.665835	0.000250175	0.155199	0.000255813	0.367832	0.000758214	2.4218e-10	0.000766944	0.118021	0.000234716	0.0857401	0.000141655	0.316996	-0.000295277	0.12267	-7.33649e-05	0.820871	0.000360924	0.511139	-0.000147678	0.691331	0.00138102	2.87892e-07	-9.40296e-05	0.632443	-0.00776387	6.10168e-19	-0.000132524	0.21721	0.00136161	0.0489932	0.00186254	0.00710748	-0.000471325
Interleukins	3.86364e-05	0.930556	0.00147998	0.0428631	-0.000536349	0.0904856	-0.00246281	0.000661125	0.00238357	1.12648e-10	-0.00235183	1.13765e-06	0.0012038	0.0393472	0.00035402	0.719123	0.000388473	0.161332	-0.000351784	0.350347	-0.00103273	1.23221e-06	5.97307e-05	0.905217	0.00010168	0.726371	0.00115591	0.000525347	0.000471755	0.190099	0.00325275	3.59609e-09	0.001555	0.00462453	0.000970434	0.0481909	-0.00157674	1.05607e-05	0.00293966	1.76193e-14	-0.00375438	2.8062e-08	-9.72655e-05	0.648095	-0.000763556	0.126342	0.00261778	0.000206995	0.000866173
Interleukins_Receptor	0.000177983	0.728784	0.000144367	0.858971	-0.00115121	0.00116398	-0.00140257	0.0552166	-0.000408419	0.388817	-0.00144108	0.000639557	0.00198962	0.00456771	0.000929618	0.458295	0.000785128	0.0865576	-0.00189872	0.00176908	0.000222894	0.418663	-0.000787549	0.111842	-0.00366516	1.89022e-12	-0.00579276	5.45627e-25	0.000795244	0.120073	0.00307801	6.22322e-08	-0.00120982	0.00977732	-0.00234365	0.00097763	-0.00143409	4.85462e-06	0.00221261	3.8679e-07	-0.00721977	7.21707e-21	-0.000974593	0.00377547	-0.0040777	0.000243772	-0.000992012	0.0973399	-0.00435547
NaturalKiller_Cell_Cytotoxicity	0.00145316	0.00889643	0.000234579	0.771136	-0.000313298	0.352107	3.05575e-05	0.965754	0.000363826	0.224157	0.00147763	1.41976e-05	0.00108887	0.0482803	-0.000426603	0.629911	0.000486302	0.159255	-0.000497164	0.253684	-0.00205179	1.21019e-17	0.000489714	0.321605	-0.00205196	1.06917e-10	-0.00337818	9.74819e-22	0.00136984	0.00620748	0.00458414	4.4532e-17	0.000320553	0.562109	-0.000502309	0.212309	0.000860679	0.0266501	0.0025181	1.04107e-12	-0.0100578	3.07594e-26	-0.00118551	2.00122e-06	-0.00146505	0.0763776	0.00101158	0.160325	-0.000453051
TCRsignalingPathway	0.00201208	0.00505825	1.1145e-05	0.987263	-0.000358828	0.157546	0.000806383	0.240094	0.000700235	0.0571622	0.00105011	0.0272737	0.000904462	0.371955	-0.000210237	0.8392	0.000443732	0.364405	-0.00121711	0.0440611	-0.00499728	6.39412e-31	-0.000215274	0.674532	-0.000675055	0.164946	-0.000383287	0.285447	0.00154518	0.0405928	0.00394853	3.01839e-11	0.00117674	0.0233003	-0.00126865	0.00877042	0.000260581	0.333723	0.00319941	7.41568e-13	-0.00751493	1.77643e-22	-0.000579949	0.0801366	-0.00100466	0.21741	0.00211547	0.00355625	-0.00048568
TGFb_Family_Member	-0.000763032	0.110222	-0.000408619	0.540398	-0.000753541	0.0151636	-0.000215538	0.728266	-0.000313255	0.194001	0.00169308	4.81568e-06	0.00126553	0.00791385	0.000927225	0.288738	-0.000382693	0.179236	-0.00113137	0.00321898	-0.00159386	2.00279e-12	-0.00134296	0.0214887	-0.000354573	0.150907	-0.000735109	0.00564124	0.00034285	0.327337	0.000406018	0.244202	-0.00127665	0.0674625	0.000393707	0.303391	-0.00040856	0.15861	0.000766217	0.0103606	-0.00751887	1.95239e-16	5.07509e-05	0.739318	0.00229594	4.11291e-05	-0.00263252	0.000474099	0.00337469
TGFb_Family_Member_Receptor	-0.00106774	0.0521232	-0.00246469	0.00102858	-0.000367385	0.342264	-0.000919028	0.14288	-0.00307498	1.11502e-14	0.00208682	5.98441e-07	0.000154174	0.732421	-0.000301647	0.794968	-0.000202108	0.642902	-0.00121821	0.0162257	-0.00307498	4.45293e-26	-0.00150314	0.00991886	-0.00315656	2.53497e-13	-0.00538048	6.347e-29	-0.00173989	0.000775758	-0.00200103	1.97348e-05	0.000206095	0.766997	-0.00108985	0.0322463	-0.00117749	0.000607618	-0.00198712	1.66694e-06	-0.00669969	5.2508e-15	0.000288136	0.193543	0.000829133	0.096725	-0.00572425	1.98261e-11	-0.00683883
TNF_Family_Members	0.000397216	0.502732	1.47969e-05	0.98139	0.00113425	0.000253502	-8.74516e-05	0.891499	0.00242099	3.62127e-13	0.0019842	4.02152e-10	0.00186622	0.00184424	0.000612017	0.546612	0.000575872	0.0727022	9.46016e-05	0.827614	0.000604868	0.0215103	-0.00125474	0.0257568	0.000586249	0.0141574	-0.00211646	4.20518e-12	0.000229856	0.575135	0.00513737	3.68932e-15	0.0027789	6.99877e-09	0.00177328	7.49926e-06	0.00105119	0.00972374	0.00325951	1.3632e-24	-0.00771513	6.89949e-20	-0.000668394	0.000158636	-0.00380569	6.02273e-05	0.0029743	1.72214e-05	-0.00102392
TNF_Family_Members_Receptors	0.00101335	0.0111098	0.00148456	0.0270642	-0.0010666	0.00106905	-0.000905647	0.223841	0.00103393	0.000776815	0.00175409	7.03602e-09	0.00177276	0.000577977	-0.00050625	0.54402	0.000425549	0.0717393	-0.000162553	0.650349	0.000591294	0.0180639	0.000157522	0.783708	0.000482244	0.0169933	-0.000291553	0.223976	0.000578963	0.0490232	0.00393157	1.21194e-18	-0.00109697	0.077566	0.000115029	0.803664	-0.000352261	0.215506	0.0024649	1.11984e-19	-0.00864513	3.04961e-23	-0.000721833	0.000133727	-0.00178633	0.0253791	0.00303811	0.000100189	0.00334354
* p < 0.05
[truncated: 1 more columns]

## Sheet: Table S3
Table S3. Validation of the signicicant relations between IRPs and age
Cancer	Limma(IRP Num)	Spearman(IRP Num)	Spearman (%)	Mutual information (IRP Num)	Mutual information (%)
ACC	5	3	0.6	5	1
BLCA	6	4	0.666667	6	1
BRCA	11	10	0.909091	9	0.818182
CESC	3	3	1	3	1
COAD	10	10	1	10	1
ESCA	15	15	1	15	1
GBM	9	9	1	9	1
KICH	0	0	NA	0	NA
KIRC	1	0	0	1	1
KIRP	6	6	1	4	0.666667
LGG	16	16	1	16	1
LIHC	8	7	0.875	7	0.875
LUAD	11	11	1	11	1
LUSC	13	12	0.923077	13	1
OVR	8	3	0.375	8	1
PAAD	15	15	1	15	1
PRAD	9	6	0.666667	9	1
READ	8	6	0.75	8	1
SKCM	10	9	0.9	10	1
STAD	14	14	1	14	1
TGCT	17	17	1	17	1
THCA	8	8	1	8	1
THYM	11	7	0.636364	11	1
UCEC	13	12	0.923077	13	1
UCS	9	9	1	9	1

## Sheet: Table S4
Table S4. Correlatons between IRPs and ARGs using Pearson, Spearman and Mutual information analysis
		All samples						Tumor samples
set1	set2	Cor	Cor_pvalue	Rho	Rho_pvalue	MI	MI_pvalue	Cor	Cor_pvalue	Rho	Rho_pvalue	MI	MI_pvalue
Antigen_Processing_and_Presentation	HAGR	0.432	0	0.359	0	0.149	0	0.302	0	0.292	0	0.069	0
Antigen_Processing_and_Presentation	IMMAGE	0.669	0	0.727	0	0.427	0	0.688	0	0.724	0	0.462	0
Antigen_Processing_and_Presentation	GO_AGING	0.476	0	0.399	0	0.186	0	0.396	0	0.387	0	0.123	0
Antigen_Processing_and_Presentation	GO_CELL_AGING	0.332	0	0.234	0	0.084	0	0.176	0	0.161	0	0.023	0
Antigen_Processing_and_Presentation	GO_CELLULAR_SENESCENCE	0.287	0	0.217	0	0.062	0	0.119	0	0.123	0	0.01	0
Antigen_Processing_and_Presentation	GO_MULTICELLULAR_ORGANISM_AGING	0.323	0	0.253	0	0.08	0	0.21	0	0.197	0	0.033	0
Antigen_Processing_and_Presentation	GO_NEGATIVE_REGULATION_OF_CELL_AGING	-0.02	0.033	-0.044	0	0	0.012	-0.06	0	-0.024	0.031	0.003	0
Antigen_Processing_and_Presentation	GO_POSITIVE_REGULATION_OF_CELL_AGING	0.468	0	0.392	0	0.179	0	0.351	0	0.291	0	0.095	0
Antigen_Processing_and_Presentation	GO_REGULATION_OF_CELL_AGING	0.284	0	0.274	0	0.061	0	0.146	0	0.169	0	0.016	0
Antigen_Processing_and_Presentation	GO_REPLICATIVE_SENESCENCE	0.363	0	0.271	0	0.102	0	0.168	0	0.13	0	0.021	0
Antimicrobials	HAGR	0.466	0	0.415	0	0.176	0	0.452	0	0.441	0	0.165	0
Antimicrobials	IMMAGE	0.595	0	0.586	0	0.315	0	0.521	0	0.531	0	0.228	0
Antimicrobials	GO_AGING	0.561	0	0.497	0	0.272	0	0.566	0	0.552	0	0.279	0
Antimicrobials	GO_CELL_AGING	0.392	0	0.288	0	0.12	0	0.294	0	0.259	0	0.065	0
Antimicrobials	GO_CELLULAR_SENESCENCE	0.316	0	0.234	0	0.076	0	0.171	0	0.165	0	0.021	0
Antimicrobials	GO_MULTICELLULAR_ORGANISM_AGING	0.222	0	0.153	0	0.037	0	0.194	0	0.184	0	0.028	0
Antimicrobials	GO_NEGATIVE_REGULATION_OF_CELL_AGING	0.056	0	0.063	0	0.002	0	0.049	0	0.093	0	0.002	0
Antimicrobials	GO_POSITIVE_REGULATION_OF_CELL_AGING	0.393	0	0.307	0	0.121	0	0.337	0	0.262	0	0.087	0
Antimicrobials	GO_REGULATION_OF_CELL_AGING	0.26	0	0.252	0	0.05	0	0.22	0	0.229	0	0.036	0
Antimicrobials	GO_REPLICATIVE_SENESCENCE	0.47	0	0.375	0	0.18	0	0.397	0	0.341	0	0.124	0
BCRSignalingPathway	HAGR	0.377	0	0.374	0	0.111	0	0.441	0	0.453	0	0.156	0
BCRSignalingPathway	IMMAGE	0.738	0	0.651	0	0.569	0	0.679	0	0.623	0	0.446	0
BCRSignalingPathway	GO_AGING	0.387	0	0.387	0	0.117	0	0.423	0	0.431	0	0.142	0
BCRSignalingPathway	GO_CELL_AGING	0.377	0	0.34	0	0.111	0	0.364	0	0.351	0	0.102	0
BCRSignalingPathway	GO_CELLULAR_SENESCENCE	0.311	0	0.265	0	0.073	0	0.238	0	0.24	0	0.042	0
BCRSignalingPathway	GO_MULTICELLULAR_ORGANISM_AGING	0.211	0	0.246	0	0.033	0	0.229	0	0.236	0	0.039	0
BCRSignalingPathway	GO_NEGATIVE_REGULATION_OF_CELL_AGING	0.031	0.001	0.033	0	0.001	0	0.05	0	0.077	0	0.002	0
BCRSignalingPathway	GO_POSITIVE_REGULATION_OF_CELL_AGING	0.308	0	0.27	0	0.072	0	0.248	0	0.192	0	0.046	0
BCRSignalingPathway	GO_REGULATION_OF_CELL_AGING	0.167	0	0.156	0	0.02	0	0.145	0	0.15	0	0.015	0
BCRSignalingPathway	GO_REPLICATIVE_SENESCENCE	0.307	0	0.277	0	0.071	0	0.279	0	0.246	0	0.058	0
Chemokines	HAGR	0.43	0	0.442	0	0.147	0	0.398	0	0.41	0	0.124	0
Chemokines	IMMAGE	0.471	0	0.533	0	0.181	0	0.496	0	0.519	0	0.204	0
Chemokines	GO_AGING	0.566	0	0.538	0	0.278	0	0.537	0	0.532	0	0.246	0
Chemokines	GO_CELL_AGING	0.316	0	0.283	0	0.076	0	0.218	0	0.218	0	0.035	0
Chemokines	GO_CELLULAR_SENESCENCE	0.23	0	0.196	0	0.039	0	0.096	0	0.112	0	0.007	0
Chemokines	GO_MULTICELLULAR_ORGANISM_AGING	0.258	0	0.203	0	0.05	0	0.174	0	0.17	0	0.022	0
Chemokines	GO_NEGATIVE_REGULATION_OF_CELL_AGING	0.048	0	0.092	0	0.002	0	0.037	0.001	0.08	0	0.001	0
Chemokines	GO_POSITIVE_REGULATION_OF_CELL_AGING	0.321	0	0.294	0	0.078	0	0.267	0	0.234	0	0.053	0
Chemokines	GO_REGULATION_OF_CELL_AGING	0.211	0	0.25	0	0.033	0	0.157	0	0.177	0	0.018	0
Chemokines	GO_REPLICATIVE_SENESCENCE	0.442	0	0.419	0	0.157	0	0.372	0	0.359	0	0.108	0
Chemokine_Receptors	HAGR	0.179	0	0.335	0	0.024	0	0.344	0	0.363	0	0.091	0
Chemokine_Receptors	IMMAGE	0.616	0	0.538	0	0.344	0	0.542	0	0.523	0	0.251	0
Chemokine_Receptors	GO_AGING	0.343	0	0.468	0	0.09	0	0.481	0	0.49	0	0.19	0
Chemokine_Receptors	GO_CELL_AGING	0.207	0	0.289	0	0.032	0	0.187	0	0.206	0	0.026	0
Chemokine_Receptors	GO_CELLULAR_SENESCENCE	0.222	0	0.28	0	0.036	0	0.173	0	0.177	0	0.022	0
Chemokine_Receptors	GO_MULTICELLULAR_ORGANISM_AGING	0.084	0	0.181	0	0.005	0	0.243	0	0.249	0	0.044	0
Chemokine_Receptors	GO_NEGATIVE_REGULATION_OF_CELL_AGING	0.103	0	0.235	0	0.008	0	0.181	0	0.207	0	0.024	0
Chemokine_Receptors	GO_POSITIVE_REGULATION_OF_CELL_AGING	0.031	0.001	0.019	0.037	0.001	0	0.021	0.06	-0.002	0.874	0	0.08
Chemokine_Receptors	GO_REGULATION_OF_CELL_AGING	0.1	0	0.238	0	0.007	0	0.244	0	0.257	0	0.044	0
Chemokine_Receptors	GO_REPLICATIVE_SENESCENCE	0.15	0	0.19	0	0.016	0	0.131	0	0.153	0	0.013	0
Cytokines	HAGR	0.32	0	0.399	0	0.078	0	0.34	0	0.374	0	0.089	0
Cytokines	IMMAGE	0.396	0	0.482	0	0.123	0	0.447	0	0.483	0	0.161	0
Cytokines	GO_AGING	0.528	0	0.555	0	0.236	0	0.554	0	0.566	0	0.265	0
Cytokines	GO_CELL_AGING	0.226	0	0.25	0	0.038	0	0.175	0	0.196	0	0.022	0
Cytokines	GO_CELLULAR_SENESCENCE	0.17	0	0.189	0	0.021	0	0.09	0	0.122	0	0.006	0
Cytokines	GO_MULTICELLULAR_ORGANISM_AGING	0.23	0	0.194	0	0.039	0	0.205	0	0.213	0	0.031	0
Cytokines	GO_NEGATIVE_REGULATION_OF_CELL_AGING	0.03	0.001	0.118	0	0.001	0	0.055	0	0.096	0	0.002	0
Cytokines	GO_POSITIVE_REGULATION_OF_CELL_AGING	0.237	0	0.249	0	0.042	0	0.245	0	0.235	0	0.045	0
Cytokines	GO_REGULATION_OF_CELL_AGING	0.142	0	0.235	0	0.015	0	0.168	0	0.2	0	0.021	0
Cytokines	GO_REPLICATIVE_SENESCENCE	0.355	0	0.367	0	0.097	0	0.314	0	0.325	0	0.075	0
Cytokine_Receptors	HAGR	0.311	0	0.243	0	0.073	0	0.322	0	0.319	0	0.079	0
Cytokine_Receptors	IMMAGE	0.492	0	0.504	0	0.2	0	0.559	0	0.596	0	0.27	0
Cytokine_Receptors	GO_AGING	0.486	0	0.408	0	0.194	0	0.486	0	0.468	0	0.195	0
Cytokine_Receptors	GO_CELL_AGING	0.228	0	0.145	0	0.039	0	0.093	0	0.088	0	0.006	0
Cytokine_Receptors	GO_CELLULAR_SENESCENCE	0.25	0	0.184	0	0.047	0	0.11	0	0.114	0	0.009	0
Cytokine_Receptors	GO_MULTICELLULAR_ORGANISM_AGING	0.234	0	0.143	0	0.041	0	0.309	0	0.246	0	0.072	0
Cytokine_Receptors	GO_NEGATIVE_REGULATION_OF_CELL_AGING	0.073	0	0.118	0	0.004	0	0.02	0.071	0.031	0.005	0	0.284
Cytokine_Receptors	GO_POSITIVE_REGULATION_OF_CELL_AGING	0.144	0	0.06	0	0.015	0	0.258	0	0.197	0	0.05	0
Cytokine_Receptors	GO_REGULATION_OF_CELL_AGING	0.134	0	0.128	0	0.013	0	0.222	0	0.218	0	0.036	0
Cytokine_Receptors	GO_REPLICATIVE_SENESCENCE	0.158	0	0.075	0	0.018	0	0.055	0	0.037	0.001	0.002	0
Interferons	HAGR	-0.225	0	-0.008	0.369	0.037	0	-0.051	0	-0.021	0.058	0.002	0
Interferons	IMMAGE	0.204	0	0.237	0	0.031	0	0.119	0	0.156	0	0.01	0
Interferons	GO_AGING	-0.109	0	-0.039	0	0.009	0	-0.008	0.459	-0.002	0.833	0	0.755
Interferons	GO_CELL_AGING	-0.1	0	0.088	0	0.007	0	0.1	0	0.108	0	0.007	0
Interferons	GO_CELLULAR_SENESCENCE	-0.094	0	0.101	0	0.006	0	0.078	0	0.103	0	0.004	0
Interferons	GO_MULTICELLULAR_ORGANISM_AGING	-0.138	0	-0.151	0	0.014	0	-0.109	0	-0.119	0	0.009	0
Interferons	GO_NEGATIVE_REGULATION_OF_CELL_AGING	-0.173	0	-0.081	0	0.022	0	0.01	0.367	0.008	0.477	0	0.777
Interferons	GO_POSITIVE_REGULATION_OF_CELL_AGING	0.088	0	0.284	0	0.006	0	0.258	0	0.281	0	0.05	0
Interferons	GO_REGULATION_OF_CELL_AGING	-0.137	0	0.109	0	0.014	0	0.074	0	0.101	0	0.004	0
Interferons	GO_REPLICATIVE_SENESCENCE	0.109	0	0.21	0	0.009	0	0.264	0	0.251	0	0.052	0
Interferon_Receptor	HAGR	0.424	0	0.33	0	0.143	0	0.26	0	0.25	0	0.05	0
Interferon_Receptor	IMMAGE	0.543	0	0.529	0	0.252	0	0.395	0	0.423	0	0.122	0
Interferon_Receptor	GO_AGING	0.509	0	0.423	0	0.217	0	0.437	0	0.426	0	0.153	0
Interferon_Receptor	GO_CELL_AGING	0.39	0	0.285	0	0.119	0	0.202	0	0.193	0	0.03	0
Interferon_Receptor	GO_CELLULAR_SENESCENCE	0.397	0	0.303	0	0.123	0	0.18	0	0.185	0	0.024	0
Interferon_Receptor	GO_MULTICELLULAR_ORGANISM_AGING	0.306	0	0.243	0	0.071	0	0.264	0	0.249	0	0.052	0
Interferon_Receptor	GO_NEGATIVE_REGULATION_OF_CELL_AGING	0.034	0	0.024	0.01	0.001	0	-0.005	0.658	0.037	0.001	0	0.527
Interferon_Receptor	GO_POSITIVE_REGULATION_OF_CELL_AGING	0.37	0	0.325	0	0.106	0	0.24	0	0.213	0	0.043	0
Interferon_Receptor	GO_REGULATION_OF_CELL_AGING	0.318	0	0.319	0	0.077	0	0.181	0	0.208	0	0.024	0
Interferon_Receptor	GO_REPLICATIVE_SENESCENCE	0.348	0	0.299	0	0.093	0	0.196	0	0.179	0	0.028	0
Interleukins	HAGR	0.208	0	0.305	0	0.032	0	0.38	0	0.392	0	0.113	0
Interleukins	IMMAGE	0.255	0	0.304	0	0.048	0	0.253	0	0.296	0	0.048	0
Interleukins	GO_AGING	0.358	0	0.43	0	0.099	0	0.437	0	0.437	0	0.153	0
Interleukins	GO_CELL_AGING	0.268	0	0.32	0	0.054	0	0.318	0	0.297	0	0.077	0
Interleukins	GO_CELLULAR_SENESCENCE	0.153	0	0.211	0	0.017	0	0.183	0	0.172	0	0.024	0
Interleukins	GO_MULTICELLULAR_ORGANISM_AGING	0.145	0	0.163	0	0.015	0	0.064	0	0.07	0	0.003	0
Interleukins	GO_NEGATIVE_REGULATION_OF_CELL_AGING	0.111	0	0.174	0	0.009	0	0.138	0	0.157	0	0.014	0
Interleukins	GO_POSITIVE_REGULATION_OF_CELL_AGING	0.124	0	0.127	0	0.011	0	0.136	0	0.121	0	0.014	0
Interleukins	GO_REGULATION_OF_CELL_AGING	0.061	0	0.134	0	0.003	0	0.162	0	0.171	0	0.019	0
Interleukins	GO_REPLICATIVE_SENESCENCE	0.392	0	0.389	0	0.12	0	0.462	0	0.442	0	0.173	0
Interleukins_Receptor	HAGR	0.231	0	0.238	0	0.04	0	0.374	0	0.359	0	0.109	0
Interleukins_Receptor	IMMAGE	0.558	0	0.463	0	0.269	0	0.501	0	0.5	0	0.208	0
Interleukins_Receptor	GO_AGING	0.366	0	0.387	0	0.104	0	0.475	0	0.456	0	0.185	0
Interleukins_Receptor	GO_CELL_AGING	0.289	0	0.248	0	0.063	0	0.321	0	0.259	0	0.079	0
Interleukins_Receptor	GO_CELLULAR_SENESCENCE	0.216	0	0.185	0	0.035	0	0.186	0	0.168	0	0.025	0
Interleukins_Receptor	GO_MULTICELLULAR_ORGANISM_AGING	0.085	0	0.099	0	0.005	0	0.118	0	0.103	0	0.01	0
Interleukins_Receptor	GO_NEGATIVE_REGULATION_OF_CELL_AGING	0.04	0	0.103	0	0.001	0	0.084	0	0.116	0	0.005	0
Interleukins_Receptor	GO_POSITIVE_REGULATION_OF_CELL_AGING	0.256	0	0.17	0	0.049	0	0.363	0	0.262	0	0.102	0
Interleukins_Receptor	GO_REGULATION_OF_CELL_AGING	0.083	0	0.111	0	0.005	0	0.226	0	0.227	0	0.038	0
Interleukins_Receptor	GO_REPLICATIVE_SENESCENCE	0.368	0	0.296	0	0.105	0	0.453	0	0.368	0	0.166	0
NaturalKiller_Cell_Cytotoxicity	HAGR	0.298	0	0.351	0	0.067	0	0.347	0	0.348	0	0.093	0
NaturalKiller_Cell_Cytotoxicity	IMMAGE	0.774	0	0.691	0	0.659	0	0.697	0	0.662	0	0.48	0
NaturalKiller_Cell_Cytotoxicity	GO_AGING	0.339	0	0.38	0	0.088	0	0.401	0	0.42	0	0.126	0
NaturalKiller_Cell_Cytotoxicity	GO_CELL_AGING	0.273	0	0.238	0	0.056	0	0.217	0	0.216	0	0.035	0
NaturalKiller_Cell_Cytotoxicity	GO_CELLULAR_SENESCENCE	0.295	0	0.247	0	0.065	0	0.191	0	0.19	0	0.027	0
NaturalKiller_Cell_Cytotoxicity	GO_MULTICELLULAR_ORGANISM_AGING	0.097	0	0.165	0	0.007	0	0.197	0	0.196	0	0.029	0
NaturalKiller_Cell_Cytotoxicity	GO_NEGATIVE_REGULATION_OF_CELL_AGING	0.057	0	0.068	0	0.002	0	0.126	0	0.143	0	0.012	0
NaturalKiller_Cell_Cytotoxicity	GO_POSITIVE_REGULATION_OF_CELL_AGING	0.243	0	0.242	0	0.044	0	0.217	0	0.183	0	0.035	0
NaturalKiller_Cell_Cytotoxicity	GO_REGULATION_OF_CELL_AGING	0.221	0	0.29	0	0.036	0	0.263	0	0.273	0	0.052	0
NaturalKiller_Cell_Cytotoxicity	GO_REPLICATIVE_SENESCENCE	0.219	0	0.243	0	0.035	0	0.174	0	0.178	0	0.022	0
TCRsignalingPathway	HAGR	0.39	0	0.473	0	0.119	0	0.539	0	0.549	0	0.248	0
TCRsignalingPathway	IMMAGE	0.675	0	0.534	0	0.439	0	0.54	0	0.479	0	0.249	0
TCRsignalingPathway	GO_AGING	0.426	0	0.495	0	0.145	0	0.519	0	0.536	0	0.227	0
TCRsignalingPathway	GO_CELL_AGING	0.441	0	0.47	0	0.156	0	0.479	0	0.469	0	0.188	0
TCRsignalingPathway	GO_CELLULAR_SENESCENCE	0.377	0	0.383	0	0.11	0	0.343	0	0.34	0	0.09	0
TCRsignalingPathway	GO_MULTICELLULAR_ORGANISM_AGING	0.144	0	0.204	0	0.015	0	0.219	0	0.214	0	0.035	0
TCRsignalingPathway	GO_NEGATIVE_REGULATION_OF_CELL_AGING	0.163	0	0.242	0	0.02	0	0.246	0	0.284	0	0.045	0
TCRsignalingPathway	GO_POSITIVE_REGULATION_OF_CELL_AGING	0.296	0	0.262	0	0.066	0	0.28	0	0.232	0	0.059	0
TCRsignalingPathway	GO_REGULATION_OF_CELL_AGING	0.248	0	0.317	0	0.046	0	0.341	0	0.352	0	0.089	0
TCRsignalingPathway	GO_REPLICATIVE_SENESCENCE	0.426	0	0.435	0	0.144	0	0.456	0	0.448	0	0.168	0
TGFb_Family_Member	HAGR	0.09	0	0.164	0	0.006	0	0.037	0.001	0.03	0.005	0.001	0
TGFb_Family_Member	IMMAGE	-0.114	0	0.043	0	0.01	0	-0.043	0	0.017	0.114	0.001	0
TGFb_Family_Member	GO_AGING	0.224	0	0.255	0	0.037	0	0.217	0	0.206	0	0.035	0
TGFb_Family_Member	GO_CELL_AGING	0.02	0.028	0.071	0	0	0.001	-0.006	0.61	-0.016	0.145	0	0.552
TGFb_Family_Member	GO_CELLULAR_SENESCENCE	0.073	0	0.148	0	0.004	0	0.095	0	0.09	0	0.007	0
TGFb_Family_Member	GO_MULTICELLULAR_ORGANISM_AGING	0.166	0	0.155	0	0.02	0	0.122	0	0.137	0	0.011	0
TGFb_Family_Member	GO_NEGATIVE_REGULATION_OF_CELL_AGING	0.113	0	0.152	0	0.009	0	0.162	0	0.138	0	0.019	0
TGFb_Family_Member	GO_POSITIVE_REGULATION_OF_CELL_AGING	0.027	0.003	0.043	0	0.001	0	-0.005	0.622	-0.018	0.099	0	0.562
TGFb_Family_Member	GO_REGULATION_OF_CELL_AGING	0.166	0	0.269	0	0.02	0	0.201	0	0.187	0	0.03	0
TGFb_Family_Member	GO_REPLICATIVE_SENESCENCE	0.056	0	0.046	0	0.002	0	-0.067	0	-0.084	0	0.003	0
TGFb_Family_Member_Receptor	HAGR	0.257	0	0.262	0	0.049	0	0.239	0	0.229	0	0.043	0
TGFb_Family_Member_Receptor	IMMAGE	0.042	0	0.134	0	0.001	0	0.141	0	0.197	0	0.014	0
TGFb_Family_Member_Receptor	GO_AGING	0.332	0	0.316	0	0.084	0	0.251	0	0.251	0	0.047	0
TGFb_Family_Member_Receptor	GO_CELL_AGING	0.246	0	0.255	0	0.045	0	0.193	0	0.192	0	0.027	0
TGFb_Family_Member_Receptor	GO_CELLULAR_SENESCENCE	0.281	0	0.307	0	0.059	0	0.253	0	0.257	0	0.048	0
TGFb_Family_Member_Receptor	GO_MULTICELLULAR_ORGANISM_AGING	0.311	0	0.282	0	0.073	0	0.348	0	0.322	0	0.093	0
TGFb_Family_Member_Receptor	GO_NEGATIVE_REGULATION_OF_CELL_AGING	0.175	0	0.216	0	0.022	0	0.135	0	0.116	0	0.013	0
TGFb_Family_Member_Receptor	GO_POSITIVE_REGULATION_OF_CELL_AGING	-0.018	0.056	-0.066	0	0	0	0.016	0.151	0.009	0.432	0	0.601
TGFb_Family_Member_Receptor	GO_REGULATION_OF_CELL_AGING	0.169	0	0.207	0	0.021	0	0.237	0	0.23	0	0.042	0
TGFb_Family_Member_Receptor	GO_REPLICATIVE_SENESCENCE	-0.016	0.086	-0.076	0	0	0.067	-0.179	0	-0.191	0	0.023	0
TNF_Family_Members	HAGR	0.386	0	0.285	0	0.116	0	0.268	0	0.256	0	0.054	0
TNF_Family_Members	IMMAGE	0.618	0	0.634	0	0.347	0	0.545	0	0.59	0	0.255	0
TNF_Family_Members	GO_AGING	0.439	0	0.327	0	0.154	0	0.398	0	0.377	0	0.125	0
TNF_Family_Members	GO_CELL_AGING	0.299	0	0.169	0	0.067	0	0.149	0	0.112	0	0.016	0
TNF_Family_Members	GO_CELLULAR_SENESCENCE	0.294	0	0.174	0	0.065	0	0.09	0	0.077	0	0.006	0
TNF_Family_Members	GO_MULTICELLULAR_ORGANISM_AGING	0.203	0	0.127	0	0.03	0	0.204	0	0.178	0	0.031	0
TNF_Family_Members	GO_NEGATIVE_REGULATION_OF_CELL_AGING	-0.098	0	-0.127	0	0.007	0	-0.131	0	-0.101	0	0.012	0
TNF_Family_Members	GO_POSITIVE_REGULATION_OF_CELL_AGING	0.446	0	0.415	0	0.16	0	0.407	0	0.331	0	0.13	0
TNF_Family_Members	GO_REGULATION_OF_CELL_AGING	0.247	0	0.222	0	0.046	0	0.124	0	0.133	0	0.011	0
TNF_Family_Members	GO_REPLICATIVE_SENESCENCE	0.289	0	0.232	0	0.063	0	0.18	0	0.118	0	0.024	0
TNF_Family_Members_Receptors	HAGR	0.435	0	0.28	0	0.152	0	0.29	0	0.253	0	0.063	0
TNF_Family_Members_Receptors	IMMAGE	0.601	0	0.565	0	0.323	0	0.497	0	0.487	0	0.205	0
TNF_Family_Members_Receptors	GO_AGING	0.481	0	0.364	0	0.19	0	0.375	0	0.347	0	0.11	0
TNF_Family_Members_Receptors	GO_CELL_AGING	0.401	0	0.237	0	0.127	0	0.225	0	0.159	0	0.037	0
TNF_Family_Members_Receptors	GO_CELLULAR_SENESCENCE	0.333	0	0.188	0	0.085	0	0.107	0	0.085	0	0.008	0
TNF_Family_Members_Receptors	GO_MULTICELLULAR_ORGANISM_AGING	0.131	0	0.05	0	0.013	0	-0.002	0.843	-0.022	0.048	0	0.626
TNF_Family_Members_Receptors	GO_NEGATIVE_REGULATION_OF_CELL_AGING	0.12	0	0.085	0	0.01	0	0.069	0	0.08	0	0.003	0
TNF_Family_Members_Receptors	GO_POSITIVE_REGULATION_OF_CELL_AGING	0.418	0	0.322	0	0.139	0	0.376	0	0.303	0	0.11	0
TNF_Family_Members_Receptors	GO_REGULATION_OF_CELL_AGING	0.282	0	0.2	0	0.06	0	0.187	0	0.178	0	0.026	0
TNF_Family_Members_Receptors	GO_REPLICATIVE_SENESCENCE	0.486	0	0.406	0	0.194	0	0.443	0	0.374	0	0.158	0

## Sheet: Table S5
Table S5. Cancer-specific results of correlations betwwen IRPs and ARGs
set1	set2	Num (Cancer)	Significantly correlated in the cancers below
Antigen_Processing_and_Presentation	IMMAGE	25	ACC	BLCA	BRCA	CESC	COAD	ESCA	GBM	KICH	KIRC	KIRP	LGG	LIHC	LUAD	LUSC	OV	PAAD	PRAD	READ	SKCM	STAD	TGCT	THCA	THYM	UCEC	UCS
Antimicrobials	IMMAGE	25	ACC	BLCA	BRCA	CESC	COAD	ESCA	GBM	KICH	KIRC	KIRP	LGG	LIHC	LUAD	LUSC	OV	PAAD	PRAD	READ	SKCM	STAD	TGCT	THCA	THYM	UCEC	UCS
turalKiller_Cell_Cytotoxicity	IMMAGE	25	ACC	BLCA	BRCA	CESC	COAD	ESCA	GBM	KICH	KIRC	KIRP	LGG	LIHC	LUAD	LUSC	OV	PAAD	PRAD	READ	SKCM	STAD	TGCT	THCA	THYM	UCEC	UCS
Chemokines	IMMAGE	24	ACC	BLCA	BRCA	CESC	COAD	ESCA	GBM	KIRC	KIRP	LGG	LIHC	LUAD	LUSC	OV	PAAD	PRAD	READ	SKCM	STAD	TGCT	THCA	THYM	UCEC	UCS
Cytokines	GO_AGING	24	ACC	BLCA	BRCA	CESC	COAD	ESCA	GBM	KICH	KIRC	KIRP	LGG	LIHC	LUAD	LUSC	OV	PAAD	PRAD	READ	SKCM	STAD	TGCT	THCA	THYM	UCS
TCRsiglingPathway	IMMAGE	24	ACC	BLCA	BRCA	CESC	COAD	ESCA	GBM	KICH	KIRC	KIRP	LGG	LIHC	LUAD	LUSC	PAAD	PRAD	READ	SKCM	STAD	TGCT	THCA	THYM	UCEC	UCS
Antimicrobials	GO_AGING	23	ACC	BLCA	BRCA	CESC	COAD	ESCA	GBM	KICH	KIRC	KIRP	LGG	LIHC	LUAD	OV	PAAD	PRAD	READ	SKCM	STAD	TGCT	THCA	THYM	UCS
BCRSiglingPathway	IMMAGE	23	ACC	BLCA	BRCA	CESC	COAD	ESCA	GBM	KICH	KIRC	KIRP	LGG	LIHC	LUAD	LUSC	PAAD	PRAD	READ	SKCM	STAD	TGCT	THCA	THYM	UCEC
Chemokine_Receptors	IMMAGE	23	ACC	BLCA	BRCA	CESC	ESCA	GBM	KICH	KIRC	KIRP	LGG	LIHC	LUAD	LUSC	OV	PAAD	PRAD	SKCM	STAD	TGCT	THCA	THYM	UCEC	UCS
TNF_Family_Members	IMMAGE	23	ACC	BLCA	BRCA	CESC	COAD	ESCA	GBM	KIRC	KIRP	LGG	LIHC	LUAD	LUSC	OV	PAAD	PRAD	READ	SKCM	STAD	TGCT	THCA	UCEC	UCS
TNF_Family_Members_Receptors	IMMAGE	23	ACC	BLCA	BRCA	CESC	COAD	ESCA	GBM	KIRC	KIRP	LGG	LIHC	LUAD	LUSC	OV	PAAD	PRAD	READ	SKCM	STAD	TGCT	THCA	THYM	UCEC
Chemokines	GO_AGING	22	ACC	BLCA	BRCA	CESC	COAD	ESCA	GBM	KICH	KIRP	LGG	LIHC	LUAD	OV	PAAD	PRAD	READ	SKCM	STAD	TGCT	THCA	THYM	UCS
Chemokine_Receptors	GO_AGING	22	ACC	BLCA	BRCA	CESC	COAD	ESCA	GBM	KICH	KIRC	KIRP	LGG	LIHC	LUAD	OV	PAAD	PRAD	READ	STAD	TGCT	THCA	UCEC	UCS
Cytokine_Receptors	GO_AGING	22	ACC	BLCA	BRCA	CESC	ESCA	GBM	KICH	KIRC	KIRP	LGG	LIHC	LUAD	OV	PAAD	PRAD	SKCM	STAD	TGCT	THCA	THYM	UCEC	UCS
Interleukins_Receptor	IMMAGE	22	ACC	BLCA	BRCA	CESC	COAD	GBM	KIRC	KIRP	LGG	LUAD	LUSC	OV	PAAD	PRAD	READ	SKCM	STAD	TGCT	THCA	THYM	UCEC	UCS
TCRsiglingPathway	GO_AGING	22	BLCA	BRCA	CESC	COAD	ESCA	GBM	KICH	KIRC	KIRP	LGG	LIHC	LUAD	LUSC	OV	PAAD	PRAD	READ	STAD	TGCT	THCA	THYM	UCS
Cytokines	IMMAGE	21	BLCA	BRCA	CESC	COAD	ESCA	GBM	KIRC	KIRP	LGG	LIHC	LUAD	LUSC	OV	PAAD	PRAD	SKCM	STAD	TGCT	THCA	THYM	UCEC
turalKiller_Cell_Cytotoxicity	GO_AGING	21	ACC	BLCA	BRCA	CESC	COAD	ESCA	GBM	KICH	KIRC	KIRP	LGG	LUAD	OV	PAAD	PRAD	READ	STAD	TGCT	THCA	THYM	UCS
TCRsiglingPathway	HARG	20	BLCA	BRCA	CESC	COAD	ESCA	GBM	KICH	KIRC	KIRP	LGG	LIHC	LUAD	OV	PAAD	PRAD	READ	STAD	TGCT	THCA	UCS
TCRsiglingPathway	GO_CELL_AGING	20	BLCA	BRCA	CESC	COAD	ESCA	GBM	KICH	KIRC	KIRP	LGG	LIHC	LUAD	PAAD	PRAD	READ	STAD	TGCT	THCA	THYM	UCS
Antimicrobials	HARG	19	ACC	BLCA	COAD	ESCA	GBM	KICH	KIRC	KIRP	LGG	LIHC	OV	PAAD	PRAD	READ	SKCM	STAD	TGCT	THCA	UCS
Cytokine_Receptors	IMMAGE	19	ACC	BLCA	BRCA	CESC	ESCA	GBM	KIRC	KIRP	LGG	LUAD	LUSC	OV	PAAD	PRAD	SKCM	STAD	TGCT	THYM	UCS
TCRsiglingPathway	GO_CELLULAR_SENESCENCE	19	BLCA	BRCA	CESC	COAD	ESCA	GBM	KICH	KIRC	KIRP	LGG	LUAD	PAAD	PRAD	READ	STAD	TGCT	THCA	THYM	UCS
Chemokine_Receptors	HARG	18	BLCA	BRCA	COAD	GBM	KICH	KIRC	LGG	LIHC	LUSC	OV	PAAD	PRAD	READ	SKCM	STAD	TGCT	THCA	THYM
Interleukins	IMMAGE	17	BLCA	BRCA	GBM	KICH	KIRC	KIRP	LGG	LIHC	LUAD	OV	PAAD	PRAD	STAD	TGCT	THCA	THYM	UCEC
TGFb_Family_Member	GO_AGING	17	BRCA	COAD	ESCA	GBM	KICH	KIRC	LGG	LIHC	LUAD	OV	PAAD	PRAD	SKCM	STAD	TGCT	THCA	UCEC
Antigen_Processing_and_Presentation	GO_POSITIVE_REGULATION_OF_CELL_AGING	16	CESC	COAD	GBM	KIRC	KIRP	LGG	LIHC	OV	PAAD	READ	SKCM	STAD	TGCT	THCA	THYM	UCEC
Cytokine_Receptors	HARG	16	ACC	BLCA	BRCA	GBM	KICH	KIRC	KIRP	LGG	LUSC	OV	PAAD	PRAD	STAD	TGCT	THCA	UCEC
Interferon_Receptor	GO_AGING	16	BRCA	COAD	ESCA	GBM	KICH	KIRC	KIRP	LGG	LIHC	PAAD	PRAD	READ	STAD	TGCT	THCA	UCS
Interleukins	GO_AGING	16	BLCA	BRCA	CESC	COAD	GBM	KIRP	LGG	LIHC	LUAD	PAAD	PRAD	READ	STAD	TGCT	THCA	UCS
BCRSiglingPathway	GO_AGING	15	BLCA	CESC	ESCA	GBM	KIRC	KIRP	LGG	LIHC	LUSC	PAAD	PRAD	STAD	TGCT	THCA	UCS
Cytokines	GO_REPLICATIVE_SENESCENCE	15	BRCA	CESC	COAD	ESCA	GBM	KICH	LGG	PAAD	PRAD	READ	STAD	TGCT	THCA	UCEC	UCS
Interferon_Receptor	GO_CELLULAR_SENESCENCE	15	BRCA	COAD	ESCA	GBM	KICH	KIRC	KIRP	LGG	PAAD	READ	SKCM	STAD	TGCT	THCA	THYM
Interferon_Receptor	GO_REGULATION_OF_CELL_AGING	15	BRCA	COAD	ESCA	GBM	KICH	KIRC	KIRP	LGG	PAAD	READ	SKCM	STAD	TGCT	THCA	THYM
Interleukins_Receptor	GO_AGING	15	ACC	BLCA	BRCA	CESC	GBM	KICH	KIRP	LGG	LUAD	PAAD	PRAD	STAD	TGCT	THCA	UCS
turalKiller_Cell_Cytotoxicity	HARG	15	BLCA	COAD	ESCA	GBM	KICH	LGG	LUSC	OV	PAAD	PRAD	READ	SKCM	STAD	TGCT	UCS
turalKiller_Cell_Cytotoxicity	GO_CELL_AGING	15	COAD	ESCA	GBM	KICH	KIRC	KIRP	LGG	LUAD	PAAD	PRAD	SKCM	STAD	TGCT	THCA	THYM
turalKiller_Cell_Cytotoxicity	GO_CELLULAR_SENESCENCE	15	COAD	ESCA	GBM	KICH	KIRC	KIRP	LGG	LUAD	PAAD	READ	SKCM	STAD	TGCT	THCA	THYM
TGFb_Family_Member	GO_NEGATIVE_REGULATION_OF_CELL_AGING	15	ACC	BRCA	CESC	ESCA	GBM	KIRC	KIRP	LGG	LUAD	LUSC	OV	PAAD	PRAD	SKCM	STAD
TGFb_Family_Member_Receptor	GO_NEGATIVE_REGULATION_OF_CELL_AGING	15	ACC	CESC	COAD	ESCA	GBM	KIRC	KIRP	LGG	LUAD	OV	PRAD	READ	STAD	THCA	UCEC
TGFb_Family_Member_Receptor	GO_REPLICATIVE_SENESCENCE	15	ACC	BLCA	COAD	ESCA	GBM	KICH	KIRC	LGG	LUSC	PAAD	READ	TGCT	THYM	UCEC	UCS
TNF_Family_Members_Receptors	GO_REPLICATIVE_SENESCENCE	15	ACC	BRCA	COAD	ESCA	GBM	KICH	KIRC	LGG	PAAD	PRAD	READ	STAD	TGCT	UCEC	UCS
Antigen_Processing_and_Presentation	GO_AGING	14	BLCA	COAD	ESCA	GBM	KIRP	LGG	LIHC	PAAD	PRAD	STAD	TGCT	THCA	THYM	UCS
Antimicrobials	GO_CELL_AGING	14	COAD	ESCA	GBM	KICH	KIRC	KIRP	LGG	LUAD	PAAD	PRAD	STAD	TGCT	THCA	THYM
Chemokines	GO_REPLICATIVE_SENESCENCE	14	BRCA	COAD	ESCA	GBM	KICH	LGG	PAAD	READ	STAD	TGCT	THCA	THYM	UCEC	UCS
Interferon_Receptor	IMMAGE	14	COAD	ESCA	GBM	KIRC	KIRP	LGG	LIHC	LUAD	LUSC	PAAD	READ	STAD	TGCT	THCA
Interferon_Receptor	GO_CELL_AGING	14	BRCA	COAD	ESCA	GBM	KICH	KIRC	KIRP	LGG	PAAD	READ	SKCM	STAD	TGCT	THCA
TCRsiglingPathway	GO_REGULATION_OF_CELL_AGING	14	BLCA	BRCA	ESCA	GBM	KICH	KIRC	KIRP	LGG	LUAD	PAAD	PRAD	STAD	TGCT	THCA
Antigen_Processing_and_Presentation	HARG	13	BLCA	COAD	ESCA	GBM	LGG	LIHC	PAAD	PRAD	SKCM	STAD	TGCT	THYM	UCS
Antimicrobials	GO_CELLULAR_SENESCENCE	13	COAD	ESCA	GBM	KICH	KIRP	LGG	LUAD	PAAD	READ	STAD	TGCT	THCA	THYM
Antimicrobials	GO_POSITIVE_REGULATION_OF_CELL_AGING	13	CESC	COAD	GBM	KICH	KIRP	LGG	OV	PAAD	READ	STAD	TGCT	THCA	UCEC
Antimicrobials	GO_REPLICATIVE_SENESCENCE	13	BRCA	COAD	ESCA	GBM	KICH	LGG	LUSC	PAAD	PRAD	READ	STAD	TGCT	THCA
Chemokines	GO_POSITIVE_REGULATION_OF_CELL_AGING	13	CESC	COAD	GBM	KICH	KIRP	LGG	PAAD	READ	STAD	TGCT	THCA	THYM	UCEC
Chemokine_Receptors	GO_CELL_AGING	13	GBM	KICH	KIRC	LGG	LUAD	LUSC	OV	PAAD	STAD	TGCT	THCA	UCEC	UCS
Chemokine_Receptors	GO_CELLULAR_SENESCENCE	13	BRCA	GBM	KICH	KIRC	LGG	LUAD	OV	PAAD	STAD	TGCT	THCA	UCEC	UCS
Cytokines	GO_REGULATION_OF_CELL_AGING	13	ACC	BLCA	COAD	ESCA	GBM	LGG	LUAD	PAAD	READ	STAD	TGCT	THCA	UCEC
Cytokine_Receptors	GO_CELL_AGING	13	BRCA	GBM	KIRC	KIRP	LGG	LUAD	OV	PAAD	PRAD	TGCT	THCA	UCEC	UCS
Cytokine_Receptors	GO_CELLULAR_SENESCENCE	13	BRCA	GBM	KIRC	KIRP	LGG	LUAD	OV	PAAD	SKCM	TGCT	THYM	UCEC	UCS
Interferon_Receptor	HARG	13	ESCA	GBM	KICH	LGG	LIHC	PAAD	PRAD	SKCM	STAD	TGCT	THCA	THYM	UCS
Interleukins	GO_CELL_AGING	13	CESC	COAD	GBM	KICH	KIRP	LGG	PAAD	READ	SKCM	STAD	TGCT	THCA	UCEC
Interleukins	GO_CELLULAR_SENESCENCE	13	COAD	GBM	KICH	KIRP	LGG	PAAD	READ	SKCM	STAD	TGCT	THCA	THYM	UCEC
Interleukins	GO_REPLICATIVE_SENESCENCE	13	ACC	BRCA	CESC	COAD	GBM	KIRP	LGG	PAAD	PRAD	READ	STAD	TGCT	UCEC
turalKiller_Cell_Cytotoxicity	GO_MULTICELLULAR_ORGANISM_AGING	13	COAD	ESCA	GBM	KICH	LGG	LUSC	PAAD	READ	SKCM	STAD	TGCT	THCA	THYM
turalKiller_Cell_Cytotoxicity	GO_POSITIVE_REGULATION_OF_CELL_AGING	13	CESC	COAD	GBM	KIRC	KIRP	LGG	PAAD	READ	SKCM	STAD	TGCT	THCA	UCEC
TGFb_Family_Member_Receptor	GO_AGING	13	ACC	BRCA	ESCA	GBM	KIRC	KIRP	LGG	LIHC	LUAD	PRAD	SKCM	TGCT	UCEC
TNF_Family_Members	GO_AGING	13	BLCA	COAD	ESCA	GBM	KICH	LGG	PAAD	PRAD	READ	STAD	TGCT	THCA	UCS
Antigen_Processing_and_Presentation	GO_MULTICELLULAR_ORGANISM_AGING	12	COAD	GBM	KICH	LGG	PAAD	PRAD	READ	SKCM	STAD	TGCT	THCA	UCS
Antimicrobials	GO_MULTICELLULAR_ORGANISM_AGING	12	COAD	ESCA	GBM	LGG	LUSC	PAAD	READ	STAD	TGCT	THCA	THYM	UCS
Chemokines	HARG	12	BLCA	COAD	ESCA	GBM	LGG	PAAD	PRAD	READ	STAD	TGCT	THCA	THYM
Chemokine_Receptors	GO_NEGATIVE_REGULATION_OF_CELL_AGING	12	BRCA	COAD	GBM	LGG	LUAD	PAAD	PRAD	READ	STAD	THCA	THYM	UCEC
Cytokine_Receptors	GO_NEGATIVE_REGULATION_OF_CELL_AGING	12	ACC	BLCA	BRCA	COAD	GBM	KIRC	LUAD	PAAD	PRAD	SKCM	THCA	UCEC
Cytokine_Receptors	GO_REGULATION_OF_CELL_AGING	12	ACC	BLCA	GBM	KIRC	KIRP	LGG	OV	PAAD	SKCM	TGCT	THCA	UCEC
Interferon_Receptor	GO_REPLICATIVE_SENESCENCE	12	BRCA	COAD	ESCA	GBM	KICH	LGG	PAAD	READ	SKCM	STAD	TGCT	THYM
TCRsiglingPathway	GO_MULTICELLULAR_ORGANISM_AGING	12	COAD	ESCA	GBM	KICH	KIRP	LGG	PAAD	READ	STAD	TGCT	THCA	THYM
TCRsiglingPathway	GO_REPLICATIVE_SENESCENCE	12	BRCA	COAD	ESCA	GBM	KICH	LGG	LUAD	PAAD	READ	STAD	TGCT	THCA
TGFb_Family_Member_Receptor	GO_CELLULAR_SENESCENCE	12	BRCA	GBM	KIRC	KIRP	LGG	LUAD	OV	PRAD	TGCT	THYM	UCEC	UCS
BCRSiglingPathway	GO_MULTICELLULAR_ORGANISM_AGING	11	COAD	GBM	KICH	LGG	PAAD	PRAD	READ	STAD	TGCT	THCA	THYM
BCRSiglingPathway	GO_POSITIVE_REGULATION_OF_CELL_AGING	11	COAD	GBM	KIRP	LGG	LIHC	PAAD	READ	STAD	TGCT	THCA	UCEC
Chemokines	GO_CELL_AGING	11	COAD	ESCA	GBM	LGG	LUAD	PAAD	STAD	TGCT	THCA	THYM	UCEC
Chemokines	GO_CELLULAR_SENESCENCE	11	COAD	ESCA	GBM	LGG	LUAD	PAAD	READ	STAD	TGCT	THCA	UCEC
Chemokines	GO_MULTICELLULAR_ORGANISM_AGING	11	BLCA	COAD	GBM	LGG	PAAD	READ	STAD	TGCT	THCA	THYM	UCS
Chemokine_Receptors	GO_REGULATION_OF_CELL_AGING	11	ACC	BLCA	GBM	KIRC	LGG	PAAD	STAD	TGCT	THCA	THYM	UCEC
Cytokines	HARG	11	BLCA	COAD	ESCA	GBM	LGG	PAAD	PRAD	READ	STAD	TGCT	THCA
Cytokines	GO_CELL_AGING	11	COAD	ESCA	GBM	LGG	LUAD	PAAD	READ	STAD	TGCT	THCA	UCEC
Cytokines	GO_CELLULAR_SENESCENCE	11	COAD	ESCA	GBM	LGG	LUAD	PAAD	READ	STAD	TGCT	THCA	UCEC
Cytokine_Receptors	GO_MULTICELLULAR_ORGANISM_AGING	11	ACC	BLCA	COAD	GBM	KIRC	LGG	LUSC	PAAD	SKCM	TGCT	THYM
Interferon_Receptor	GO_MULTICELLULAR_ORGANISM_AGING	11	BRCA	COAD	ESCA	GBM	LGG	PAAD	PRAD	READ	STAD	TGCT	THCA
Interferon_Receptor	GO_POSITIVE_REGULATION_OF_CELL_AGING	11	COAD	GBM	KICH	KIRP	LGG	PAAD	READ	STAD	TGCT	THCA	THYM
Interleukins	GO_MULTICELLULAR_ORGANISM_AGING	11	COAD	GBM	KICH	LGG	PAAD	READ	SKCM	STAD	TGCT	THCA	THYM
Interleukins	GO_POSITIVE_REGULATION_OF_CELL_AGING	11	COAD	GBM	KIRP	LGG	OV	PAAD	READ	STAD	TGCT	THCA	UCEC
Interleukins	GO_REGULATION_OF_CELL_AGING	11	BLCA	COAD	GBM	KIRP	LGG	PAAD	READ	SKCM	STAD	THCA	UCEC
Interleukins_Receptor	GO_POSITIVE_REGULATION_OF_CELL_AGING	11	CESC	COAD	GBM	KICH	LGG	LUAD	PAAD	READ	STAD	TGCT	THCA
turalKiller_Cell_Cytotoxicity	GO_REGULATION_OF_CELL_AGING	11	ACC	BLCA	ESCA	GBM	KIRC	LGG	PAAD	SKCM	STAD	TGCT	THCA
TGFb_Family_Member_Receptor	HARG	11	BRCA	ESCA	GBM	KIRC	KIRP	LGG	LUSC	PRAD	TGCT	THCA	UCEC
TGFb_Family_Member_Receptor	GO_CELL_AGING	11	BRCA	GBM	KIRC	KIRP	LGG	LUAD	OV	PRAD	TGCT	UCEC	UCS
TGFb_Family_Member_Receptor	GO_MULTICELLULAR_ORGANISM_AGING	11	COAD	GBM	KICH	KIRC	KIRP	LGG	LUSC	PRAD	READ	SKCM	TGCT
TGFb_Family_Member_Receptor	GO_POSITIVE_REGULATION_OF_CELL_AGING	11	COAD	ESCA	GBM	KICH	LGG	LUAD	READ	SKCM	TGCT	THCA	UCEC
TNF_Family_Members	GO_CELLULAR_SENESCENCE	11	COAD	GBM	KICH	PAAD	READ	SKCM	STAD	TGCT	THCA	UCEC	UCS
TNF_Family_Members	GO_REGULATION_OF_CELL_AGING	11	BLCA	COAD	ESCA	GBM	PAAD	SKCM	STAD	TGCT	THCA	THYM	UCEC
TNF_Family_Members_Receptors	GO_AGING	11	BLCA	BRCA	ESCA	GBM	KICH	LGG	LIHC	PAAD	STAD	TGCT	THCA
TNF_Family_Members_Receptors	GO_POSITIVE_REGULATION_OF_CELL_AGING	11	COAD	GBM	KICH	LGG	LIHC	PAAD	READ	STAD	TGCT	THCA	UCEC
Antigen_Processing_and_Presentation	GO_CELLULAR_SENESCENCE	10	COAD	ESCA	GBM	LGG	PAAD	SKCM	STAD	TGCT	THCA	UCEC
Antimicrobials	GO_NEGATIVE_REGULATION_OF_CELL_AGING	10	ACC	BLCA	ESCA	GBM	LGG	LUAD	PAAD	READ	STAD	UCEC
Antimicrobials	GO_REGULATION_OF_CELL_AGING	10	ACC	BLCA	ESCA	GBM	KIRP	LGG	PAAD	STAD	TGCT	THCA
BCRSiglingPathway	GO_CELLULAR_SENESCENCE	10	GBM	KIRC	KIRP	LGG	PAAD	STAD	TGCT	THCA	THYM	UCEC
Chemokines	GO_REGULATION_OF_CELL_AGING	10	ACC	BLCA	ESCA	GBM	LGG	PAAD	STAD	TGCT	THCA	UCEC
Chemokine_Receptors	GO_MULTICELLULAR_ORGANISM_AGING	10	BLCA	COAD	GBM	KICH	LGG	LUSC	PAAD	STAD	TGCT	THYM
Interleukins	HARG	10	BLCA	COAD	GBM	KIRP	LGG	PAAD	PRAD	READ	STAD	TGCT
Interleukins_Receptor	GO_MULTICELLULAR_ORGANISM_AGING	10	COAD	GBM	LGG	LUSC	PAAD	READ	SKCM	TGCT	THCA	THYM
TGFb_Family_Member	GO_REGULATION_OF_CELL_AGING	10	ACC	CESC	ESCA	GBM	KIRC	LGG	OV	PAAD	STAD	TGCT
TGFb_Family_Member_Receptor	GO_REGULATION_OF_CELL_AGING	10	CESC	ESCA	GBM	KIRC	KIRP	LGG	OV	PRAD	TGCT	UCEC
TNF_Family_Members	HARG	10	BLCA	COAD	ESCA	GBM	PAAD	READ	SKCM	STAD	TGCT	THYM
TNF_Family_Members	GO_MULTICELLULAR_ORGANISM_AGING	10	COAD	GBM	PAAD	PRAD	READ	SKCM	STAD	TGCT	THCA	THYM
TNF_Family_Members	GO_REPLICATIVE_SENESCENCE	10	COAD	ESCA	GBM	LUSC	PAAD	READ	SKCM	STAD	TGCT	THYM
Antigen_Processing_and_Presentation	GO_NEGATIVE_REGULATION_OF_CELL_AGING	9	CESC	GBM	LUAD	OV	PAAD	SKCM	THCA	THYM	UCEC
Antigen_Processing_and_Presentation	GO_REGULATION_OF_CELL_AGING	9	ESCA	GBM	LGG	PAAD	SKCM	STAD	TGCT	THCA	THYM
Antigen_Processing_and_Presentation	GO_REPLICATIVE_SENESCENCE	9	COAD	ESCA	GBM	LGG	PAAD	READ	STAD	TGCT	THYM
BCRSiglingPathway	HARG	9	BLCA	GBM	KIRC	LGG	LIHC	PAAD	PRAD	STAD	TGCT
Cytokines	GO_POSITIVE_REGULATION_OF_CELL_AGING	9	GBM	KICH	KIRP	LGG	PAAD	STAD	TGCT	THYM	UCEC
Interferons	GO_REPLICATIVE_SENESCENCE	9	BLCA	CESC	COAD	GBM	KICH	LGG	LUAD	SKCM	TGCT
Interleukins_Receptor	HARG	9	BLCA	GBM	LGG	LUSC	PAAD	PRAD	STAD	TGCT	THCA
Interleukins_Receptor	GO_CELLULAR_SENESCENCE	9	GBM	LGG	LUAD	PAAD	SKCM	TGCT	THCA	THYM	UCS
Interleukins_Receptor	GO_NEGATIVE_REGULATION_OF_CELL_AGING	9	ACC	BLCA	BRCA	COAD	GBM	LUAD	PAAD	READ	SKCM
Interleukins_Receptor	GO_REPLICATIVE_SENESCENCE	9	BRCA	GBM	KICH	KIRC	LGG	LUSC	PAAD	TGCT	UCS
turalKiller_Cell_Cytotoxicity	GO_NEGATIVE_REGULATION_OF_CELL_AGING	9	ACC	BLCA	ESCA	GBM	LGG	LUAD	PAAD	SKCM	STAD
TCRsiglingPathway	GO_NEGATIVE_REGULATION_OF_CELL_AGING	9	ESCA	GBM	KIRC	KIRP	LGG	LUAD	PAAD	PRAD	STAD
TCRsiglingPathway	GO_POSITIVE_REGULATION_OF_CELL_AGING	9	CESC	COAD	GBM	LGG	PAAD	READ	STAD	TGCT	UCEC
TGFb_Family_Member	HARG	9	ESCA	GBM	KIRC	LGG	PAAD	PRAD	SKCM	STAD	TGCT
TGFb_Family_Member	GO_CELL_AGING	9	ESCA	GBM	KIRC	LGG	LUAD	OV	PAAD	STAD	TGCT
TNF_Family_Members	GO_CELL_AGING	9	COAD	GBM	PAAD	READ	SKCM	STAD	TGCT	THCA	UCEC
TNF_Family_Members	GO_POSITIVE_REGULATION_OF_CELL_AGING	9	COAD	GBM	KICH	PAAD	READ	SKCM	STAD	TGCT	UCEC
TNF_Family_Members_Receptors	GO_CELLULAR_SENESCENCE	9	ESCA	GBM	KICH	LGG	PAAD	STAD	TGCT	THCA	UCEC
Antigen_Processing_and_Presentation	GO_CELL_AGING	8	COAD	GBM	LGG	PAAD	STAD	TGCT	THYM	UCEC
BCRSiglingPathway	GO_CELL_AGING	8	GBM	KIRC	KIRP	LGG	PAAD	STAD	TGCT	UCEC
BCRSiglingPathway	GO_REGULATION_OF_CELL_AGING	8	GBM	KIRC	KIRP	LGG	PAAD	STAD	TGCT	UCEC
Chemokines	GO_NEGATIVE_REGULATION_OF_CELL_AGING	8	ACC	BLCA	ESCA	GBM	LUAD	PAAD	STAD	UCEC
Chemokine_Receptors	GO_POSITIVE_REGULATION_OF_CELL_AGING	8	COAD	GBM	KIRP	LGG	LIHC	LUAD	PAAD	TGCT
Chemokine_Receptors	GO_REPLICATIVE_SENESCENCE	8	GBM	LGG	LUSC	OV	PAAD	TGCT	THCA	UCS
Cytokine_Receptors	GO_REPLICATIVE_SENESCENCE	8	COAD	GBM	LGG	LUSC	TGCT	THCA	UCEC	UCS
Interferon_Receptor	GO_NEGATIVE_REGULATION_OF_CELL_AGING	8	BRCA	ESCA	GBM	LGG	PAAD	SKCM	STAD	THYM
Interleukins_Receptor	GO_CELL_AGING	8	GBM	LGG	LUAD	LUSC	PAAD	TGCT	THCA	UCS
Interleukins_Receptor	GO_REGULATION_OF_CELL_AGING	8	ACC	BLCA	GBM	LGG	PAAD	SKCM	TGCT	THCA
turalKiller_Cell_Cytotoxicity	GO_REPLICATIVE_SENESCENCE	8	ESCA	GBM	LGG	LUSC	PAAD	READ	STAD	TGCT
TGFb_Family_Member	GO_CELLULAR_SENESCENCE	8	ESCA	GBM	KIRC	LGG	OV	PAAD	STAD	TGCT
TGFb_Family_Member	GO_MULTICELLULAR_ORGANISM_AGING	8	ESCA	GBM	KIRC	LGG	PAAD	STAD	TGCT	THCA
TGFb_Family_Member_Receptor	IMMAGE	8	COAD	ESCA	GBM	LGG	LUSC	READ	TGCT	THCA
TNF_Family_Members	GO_NEGATIVE_REGULATION_OF_CELL_AGING	8	ESCA	GBM	OV	PAAD	SKCM	STAD	THYM	UCEC
TNF_Family_Members_Receptors	GO_CELL_AGING	8	GBM	KICH	LGG	PAAD	STAD	TGCT	THCA	UCEC
TNF_Family_Members_Receptors	GO_MULTICELLULAR_ORGANISM_AGING	8	COAD	GBM	PAAD	READ	STAD	TGCT	THCA	THYM
Cytokines	GO_MULTICELLULAR_ORGANISM_AGING	7	BLCA	GBM	LGG	PAAD	STAD	TGCT	THYM
Cytokines	GO_NEGATIVE_REGULATION_OF_CELL_AGING	7	BLCA	ESCA	GBM	LUAD	PAAD	STAD	UCEC
Interferons	GO_MULTICELLULAR_ORGANISM_AGING	7	ACC	GBM	LGG	SKCM	TGCT	THCA	THYM
TNF_Family_Members_Receptors	HARG	7	BLCA	ESCA	GBM	LGG	PAAD	STAD	TGCT
TNF_Family_Members_Receptors	GO_REGULATION_OF_CELL_AGING	7	ESCA	GBM	PAAD	STAD	TGCT	THCA	UCEC
BCRSiglingPathway	GO_NEGATIVE_REGULATION_OF_CELL_AGING	6	COAD	GBM	PAAD	READ	THCA	UCEC
Interferons	IMMAGE	6	GBM	KIRC	TGCT	THCA	THYM	UCEC
Interferons	GO_AGING	6	ACC	GBM	KIRP	LGG	LIHC	TGCT
Interferons	GO_POSITIVE_REGULATION_OF_CELL_AGING	6	GBM	LGG	SKCM	TGCT	THCA	UCEC
Interferons	GO_REGULATION_OF_CELL_AGING	6	ACC	COAD	GBM	LGG	SKCM	TGCT
TGFb_Family_Member	GO_REPLICATIVE_SENESCENCE	6	ACC	ESCA	GBM	LGG	TGCT	UCS
TNF_Family_Members_Receptors	GO_NEGATIVE_REGULATION_OF_CELL_AGING	6	COAD	ESCA	GBM	PAAD	READ	UCEC
BCRSiglingPathway	GO_REPLICATIVE_SENESCENCE	5	GBM	PAAD	STAD	TGCT	UCS
Cytokine_Receptors	GO_POSITIVE_REGULATION_OF_CELL_AGING	5	COAD	GBM	LGG	LUAD	TGCT
Interferons	HARG	5	GBM	KIRP	LGG	LIHC	TGCT
Interferons	GO_CELL_AGING	5	GBM	KIRP	LGG	SKCM	TGCT
Interferons	GO_CELLULAR_SENESCENCE	5	GBM	LGG	SKCM	TGCT	THYM
Interferons	GO_NEGATIVE_REGULATION_OF_CELL_AGING	5	ACC	GBM	LGG	SKCM	UCEC
Interleukins	GO_NEGATIVE_REGULATION_OF_CELL_AGING	5	GBM	OV	PAAD	SKCM	UCEC
TGFb_Family_Member	IMMAGE	5	GBM	LGG	LUSC	PAAD	TGCT
TGFb_Family_Member	GO_POSITIVE_REGULATION_OF_CELL_AGING	3	GBM	LGG	TGCT

## Sheet: Table S6
Table S6. Top 1% ranked genes across 25 cancers
Cancer	Symbol	Entrez ID	Initial value	Final probability
ACC	SEMA3B	7869	1	0.0122299
ACC	SAA2	6289	1	0.0114546
ACC	DES	1674	1	0.010746
ACC	NR2F1	7025	1	0.0106853
ACC	MAP3K8	1326	1	0.0105606
ACC	PTH1R	5745	1	0.0104954
ACC	NPY	4852	1	0.0104675
ACC	NR4A2	4929	1	0.010421
ACC	CCL2	6347	1	0.0104111
ACC	IGF2	3481	1	0.0103482
ACC	CXCL12	6387	1	0.0103088
ACC	SAA1	6288	1	0.0101267
ACC	ESM1	11082	1	0.0101211
ACC	MARCO	8685	1	0.0100898
ACC	TKFC	26007	1	0.0100439
ACC	RBPMS	11030	0	0.00930149
ACC	MRPS26	64949	0	0.00476096
ACC	PXN	5829	0	0.00466961
ACC	MRPL23	6150	0	0.00321654
ACC	RXRB	6257	0	0.00308458
ACC	HIPK2	28996	0	0.00305849
ACC	TP53	7157	0	0.0029239
ACC	GRB2	2885	0	0.00231676
ACC	CACTIN	58509	0	0.0021887
ACC	IKBKG	8517	0	0.00212985
ACC	RPS16	6217	0	0.00201291
ACC	MEN1	4221	0	0.00193719
ACC	LMO3	55885	0	0.00186894
ACC	TP73	7161	0	0.00184965
ACC	KIT	3815	0	0.00182485
ACC	EXOC1	55763	0	0.00182236
ACC	NOC4L	79050	0	0.00181144
ACC	PCNA	5111	0	0.00176562
ACC	DLL3	10683	0	0.00174157
ACC	COLEC12	81035	0	0.00173258
ACC	VIM	7431	0	0.00172595
ACC	MTUS2	23281	0	0.0016868
ACC	HECW2	57520	0	0.00165694
ACC	RD3	343035	0	0.0016297
ACC	U2AF2	11338	0	0.00151872
ACC	MRPS14	63931	0	0.00149038
ACC	PRKACA	5566	0	0.00148503
ACC	APC	324	0	0.00146135
ACC	SF3B3	23450	0	0.0014432
ACC	NA	732272	0	0.0014266
ACC	CBLB	868	0	0.00135969
ACC	RPL6	6128	0	0.00135912
ACC	TFIP11	24144	0	0.00134094
ACC	PSMB9	5698	0	0.00132241
ACC	CDK2	1017	0	0.00131996
ACC	RPL4	6124	0	0.00128847
ACC	MAPK6	5597	0	0.0012865
ACC	NFKB1	4790	0	0.00127808
ACC	YWHAZ	7534	0	0.0012283
ACC	DDX5	1655	0	0.00119422
ACC	SP1	6667	0	0.00118
ACC	CPSF6	11052	0	0.00116749
ACC	YWHAG	7532	0	0.00113356
ACC	KRT40	125115	0	0.00112599
ACC	SRC	6714	0	0.00112416
ACC	TRAF6	7189	0	0.00112234
ACC	DDX23	9416	0	0.00111989
ACC	MYC	4609	0	0.0011159
ACC	WDR77	79084	0	0.00108774
ACC	ACTB	60	0	0.00108191
ACC	PAXBP1	94104	0	0.0010813
ACC	RPS3	6188	0	0.00103156
ACC	TCP1	6950	0	0.00102528
ACC	HSPA1A	3303	0	0.00102166
ACC	SNRNP200	23020	0	0.00101942
ACC	WBP11	51729	0	0.00100963
ACC	EEF1A1	1915	0	0.00100687
ACC	YWHAE	7531	0	0.000992758
ACC	EGFR	1956	0	0.000990605
ACC	SMARCB1	6598	0	0.0009833
ACC	SRSF5	6430	0	0.000982303
ACC	UIMC1	51720	0	0.000946213
ACC	PPIH	10465	0	0.000941791
ACC	GNL3	26354	0	0.000925294
ACC	EEF1B2	1933	0	0.00092267
ACC	DHX9	1660	0	0.000919829
ACC	CTNNB1	1499	0	0.000915022
ACC	UBC	7316	0	0.00091496
ACC	SMURF2	64750	0	0.000913834
ACC	ESR1	2099	0	0.000910909
ACC	SF3B1	23451	0	0.00090473
ACC	UBE2I	7329	0	0.000904371
ACC	FBL	2091	0	0.000897619
ACC	PLCG1	5335	0	0.000893626
ACC	HNF1A	6927	0	0.000880785
ACC	FYN	2534	0	0.00087575
ACC	HNRNPU	3192	0	0.000868066
ACC	U2AF1	7307	0	0.000862176
ACC	CREBBP	1387	0	0.000858142
ACC	PTPRO	5800	0	0.00085664
ACC	RPS27A	6233	0	0.000853569
ACC	HNRNPA1	3178	0	0.000853371
ACC	HSP90AB1	3326	0	0.000851025
ACC	SOX5	6660	0	0.000845121
ACC	PFKFB3	5209	0	0.000838007
ACC	GNB3	2784	0	0.000835878
ACC	PRPF4B	8899	0	0.000835769
ACC	PABPC1	26986	0	0.000833981
ACC	BARD1	580	0	0.000833872
ACC	CSNK2A1	1457	0	0.000830688
ACC	ADH5	128	0	0.000829856
ACC	CRK	1398	0	0.000829728
ACC	RBBP6	5930	0	0.000825745
ACC	IKBKE	9641	0	0.000822473
ACC	PRPF8	10594	0	0.000811276
ACC	ARRB2	409	0	0.000808531
ACC	ZBTB8A	653121	0	0.000803721
ACC	EP300	2033	0	0.000799567
ACC	INHBC	3626	0	0.000798365
ACC	HSPA8	3312	0	0.000794124
ACC	NEK3	4752	0	0.000792779
ACC	RPL23	9349	0	0.000785485
ACC	DRG1	4733	0	0.000781704
ACC	DDX39B	7919	0	0.000778044
ACC	RPL28	6158	0	0.000777711
ACC	HNRNPM	4670	0	0.000776707
ACC	SUOX	6821	0	0.000776061
ACC	NCL	4691	0	0.000768627
ACC	NPM1	4869	0	0.000768366
ACC	FAM9B	171483	0	0.000760518
ACC	KRTAP10-7	386675	0	0.000760297
ACC	JUN	3725	0	0.000751787
ACC	KCNA2	3737	0	0.000750514
ACC	PARP1	142	0	0.000750365
ACC	ADH6	130	0	0.000749912
ACC	PRKCA	5578	0	0.000736309
ACC	YWHAQ	10971	0	0.000730121
ACC	SLC25A5	292	0	0.000726023
ACC	GSK3B	2932	0	0.000724659
BLCA	ISG15	9636	1	0.0113435
BLCA	PTGDS	5730	1	0.0105527
BLCA	GPR17	2840	1	0.0103254
BLCA	NR2F1	7025	1	0.0100387
BLCA	CXCL13	10563	1	0.0100213
BLCA	TGFBR3	7049	1	0.00995191
BLCA	ANGPTL1	9068	1	0.00990679
BLCA	MMP9	4318	1	0.00970528
BLCA	PDGFRA	5156	1	0.00967724
BLCA	MASP1	5648	1	0.009661
BLCA	SPP1	6696	1	0.00965352
BLCA	BIRC5	332	1	0.00961248
BLCA	PLAU	5328	1	0.00959717
BLCA	CCL18	6362	1	0.0095065
BLCA	PLXNB3	5365	1	0.00948227
BLCA	LTBP4	8425	1	0.00943962
BLCA	CCDC114	93233	0	0.00894515
BLCA	TRAF1	7185	0	0.00315377
BLCA	GRB2	2885	0	0.00276587
BLCA	GTF3C4	9329	0	0.00271456
BLCA	SRSF11	9295	0	0.00257651
BLCA	SP1	6667	0	0.00244962
BLCA	RELA	5970	0	0.00244109
BLCA	MAPK3	5595	0	0.00228319
BLCA	TAF7	6879	0	0.00227227
BLCA	CTF1	1489	0	0.00214988
BLCA	DHX9	1660	0	0.00207369
BLCA	GSK3B	2932	0	0.00201649
BLCA	DDX5	1655	0	0.00187387
BLCA	PRKACA	5566	0	0.0018445
BLCA	BCAR1	9564	0	0.00182343
BLCA	VDAC3	7419	0	0.0018055
BLCA	RPL26	6154	0	0.00172494
BLCA	PRKCG	5582	0	0.0015625
BLCA	NCL	4691	0	0.00155349
BLCA	USHBP1	83878	0	0.00151436
BLCA	ANXA2	302	0	0.00150892
BLCA	HDAC1	3065	0	0.00149099
BLCA	SYNE1	23345	0	0.00148251
BLCA	ARRB2	409	0	0.00147044
BLCA	RPS8	6202	0	0.00146015
BLCA	IKBKG	8517	0	0.0014512
BLCA	MRPS6	64968	0	0.00145039
BLCA	HNRNPC	3183	0	0.00143292
BLCA	ITGB3	3690	0	0.00141471
BLCA	AGXT	189	0	0.00141318
BLCA	NAP1L1	4673	0	0.0013974
BLCA	TEX10	54881	0	0.00136559
BLCA	ATP6V1A	523	0	0.00135424
BLCA	ARRB1	408	0	0.00131442
BLCA	RPL4	6124	0	0.00131322
BLCA	MPP3	4356	0	0.00126599
BLCA	SNAP29	9342	0	0.00125136
BLCA	PRPF40A	55660	0	0.00124784
BLCA	SRSF1	6426	0	0.00123167
BLCA	SF3B2	10992	0	0.00122437
BLCA	RPS9	6203	0	0.00122337
BLCA	HSPA8	3312	0	0.00122034
BLCA	KANK2	25959	0	0.00121328
BLCA	MRPS22	56945	0	0.00121046
BLCA	YWHAZ	7534	0	0.00119187
BLCA	ALPI	248	0	0.00118745
BLCA	RPLP0	6175	0	0.0011755
BLCA	IGF2BP3	10643	0	0.0011702
BLCA	RPL7A	6130	0	0.00117008
BLCA	UBC	7316	0	0.00116391
BLCA	NDUFS5	4725	0	0.00113711
BLCA	TP53	7157	0	0.00112379
BLCA	RPL27	6155	0	0.00112058
BLCA	SNRNP200	23020	0	0.00111852
BLCA	PPM1G	5496	0	0.00111566
BLCA	SRC	6714	0	0.00110353
BLCA	KRT15	3866	0	0.00108947
BLCA	RBMX	27316	0	0.0010868
BLCA	MAPK9	5601	0	0.00107455
BLCA	RPL14	9045	0	0.00107081
BLCA	YWHAG	7532	0	0.00106417
BLCA	TF	7018	0	0.00105981
BLCA	POLE2	5427	0	0.00104838
BLCA	PLCG1	5335	0	0.00104211
BLCA	BMP7	655	0	0.00103527
BLCA	NUP133	55746	0	0.000996084
BLCA	ILK	3611	0	0.000995347
BLCA	CDK2	1017	0	0.000977086
BLCA	TRAF6	7189	0	0.000974576
BLCA	SF3B3	23450	0	0.000970143
BLCA	EEF1A1	1915	0	0.000967385
BLCA	MYC	4609	0	0.000952029
BLCA	CREB3	10488	0	0.000949166
BLCA	SF3A1	10291	0	0.000941486
BLCA	KRT40	125115	0	0.000939855
BLCA	MEOX2	4223	0	0.000924706
BLCA	EGFR	1956	0	0.000918084
BLCA	IKBKE	9641	0	0.000906098
BLCA	NDUFB9	4715	0	0.000899785
BLCA	WRAP73	49856	0	0.000897448
BLCA	RPL10	6134	0	0.000889176
BLCA	ANXA1	301	0	0.000874832
BLCA	PABPC1	26986	0	0.000871975
BLCA	KAT7	11143	0	0.000868209
BLCA	NR0B2	8431	0	0.000865674
BLCA	DHX8	1659	0	0.000856732
BLCA	CDC5L	988	0	0.000855654
BLCA	RPS27A	6233	0	0.000855258
BLCA	AGO3	192669	0	0.000852667
BLCA	CCND1	595	0	0.000850779
BLCA	PPIE	10450	0	0.00084966
BLCA	IRAK1	3654	0	0.000838808
BLCA	SF3B1	23451	0	0.000835958
BLCA	SHMT2	6472	0	0.000834684
BLCA	ATP6V0C	527	0	0.000831702
BLCA	TRIR	79002	0	0.000828127
BLCA	PPWD1	23398	0	0.000824995
BLCA	ACTB	60	0	0.000823599
BLCA	RPL29	6159	0	0.000822953
BLCA	CRK	1398	0	0.000822539
BLCA	PIK3R1	5295	0	0.000819167
BLCA	MAPK1	5594	0	0.000816116
BLCA	PHB	5245	0	0.000813892
BLCA	TOP1	7150	0	0.000812434
BLCA	REL	5966	0	0.000809714
BLCA	RPS13	6207	0	0.000806619
BLCA	RPL23	9349	0	0.000806323
BLCA	HSP90AB1	3326	0	0.000803169
BLCA	PRKCA	5578	0	0.000802615
BLCA	NPM1	4869	0	0.000802536
BLCA	GTF3C1	2975	0	0.000795509
BLCA	UBE2E2	7325	0	0.000794424
BLCA	PRKCQ	5588	0	0.000792917
BLCA	HNRNPU	3192	0	0.000792728
BLCA	RPL3	6122	0	0.000792186
BLCA	CSNK1E	1454	0	0.000787581
BLCA	FYN	2534	0	0.000786179
BLCA	RPL11	6135	0	0.000785202
BRCA	EGFR	1956	1	0.00396633
BRCA	ESR1	2099	1	0.00380933
BRCA	CXCL2	2920	1	0.00342615
BRCA	SAA2	6289	1	0.00337774
BRCA	BMPR1B	658	1	0.00335132
BRCA	NR4A1	3164	1	0.00329694
BRCA	EDN1	1906	1	0.00328428
BRCA	PPARG	5468	1	0.00323001
BRCA	TMPRSS6	164656	1	0.00322963
BRCA	ADRB2	154	1	0.00320344
BRCA	DES	1674	1	0.00319903
BRCA	TGFBR2	7048	1	0.00317947
BRCA	LIFR	3977	1	0.00317178
BRCA	CXCL13	10563	1	0.00315489
BRCA	EDNRB	1910	1	0.00314412
BRCA	NGFR	4804	1	0.00313947
BRCA	SPP1	6696	1	0.00312374
BRCA	CNTFR	1271	1	0.00312335
BRCA	MIA	8190	1	0.00311452
BRCA	ANGPTL1	9068	1	0.00311372
BRCA	PRLR	5618	1	0.00311309
BRCA	PTX3	5806	1	0.00310785
BRCA	PTH1R	5745	1	0.00310635
BRCA	NPR1	4881	1	0.00310461
BRCA	MMP9	4318	1	0.00310323
BRCA	SDC1	6382	1	0.00310277
BRCA	OGN	4969	1	0.00309766
BRCA	IGF1	3479	1	0.00309464
BRCA	PDGFRA	5156	1	0.0030913
BRCA	ROBO3	64221	1	0.00309118
BRCA	VAV3	10451	1	0.00308101
BRCA	ADM	133	1	0.00307264
BRCA	CCL21	6366	1	0.00306773
BRCA	IL33	90865	1	0.00306699
BRCA	TPM2	7169	1	0.00305642
BRCA	PLA2G2A	5320	1	0.00305614
BRCA	ACKR1	2532	1	0.00303795
BRCA	FGF7	2252	1	0.00303659
BRCA	LEP	3952	1	0.00303424
BRCA	CX3CL1	6376	1	0.00302613
BRCA	S1PR1	1901	1	0.00302294
BRCA	CXCL10	3627	1	0.00301888
BRCA	CCL14	6358	1	0.00301146
BRCA	CLDN4	1364	1	0.00301044
BRCA	FCGR3A	2214	1	0.00300989
BRCA	AREG	374	1	0.00299108
BRCA	SAA1	6288	1	0.00298854
BRCA	IL11RA	3590	1	0.00297811
BRCA	ADIPOQ	9370	1	0.00297741
BRCA	OLR1	4973	1	0.00297729
BRCA	LTBP4	8425	1	0.00296947
BRCA	GRB2	2885	0	0.00270072
BRCA	IKBKE	9641	0	0.00182399
BRCA	RPL37A	6168	0	0.0017995
BRCA	TCF4	6925	0	0.00179336
BRCA	MRPL3	11222	0	0.00173249
BRCA	TP53	7157	0	0.00164576
BRCA	MRPL34	64981	0	0.00161283
BRCA	PRKACA	5566	0	0.00160716
BRCA	YWHAZ	7534	0	0.00155627
BRCA	U2AF1	7307	0	0.00149006
BRCA	SF3B3	23450	0	0.00148568
BRCA	YWHAG	7532	0	0.00147017
BRCA	DDX5	1655	0	0.00138562
BRCA	SP1	6667	0	0.0013814
BRCA	MGAT2	4247	0	0.00136078
BRCA	RELA	5970	0	0.00133206
BRCA	DHX9	1660	0	0.0012948
BRCA	CDK2	1017	0	0.00129381
BRCA	IKBKG	8517	0	0.0012771
BRCA	PSMA1	5682	0	0.00126716
BRCA	SF3B6	51639	0	0.00126055
BRCA	MAPK3	5595	0	0.00123747
BRCA	UBC	7316	0	0.00117801
BRCA	RPL26	6154	0	0.00116416
BRCA	CDC5L	988	0	0.00115604
BRCA	SRC	6714	0	0.00112513
BRCA	MAPK9	5601	0	0.0010969
BRCA	EEF1A1	1915	0	0.00107433
BRCA	SRSF11	9295	0	0.00106712
BRCA	GTF3C4	9329	0	0.00106526
BRCA	PIK3R1	5295	0	0.00106428
BRCA	PPP2R1A	5518	0	0.00105017
BRCA	GADD45B	4616	0	0.0010453
BRCA	RPS8	6202	0	0.00103951
BRCA	MAPK6	5597	0	0.00103403
BRCA	TRAF6	7189	0	0.0010258
BRCA	NCL	4691	0	0.00100703
BRCA	SNRNP35	11066	0	0.000991295
BRCA	THOC2	57187	0	0.000986258
BRCA	ZW10	9183	0	0.000980912
BRCA	MYC	4609	0	0.000980307
BRCA	SF3B2	10992	0	0.000967129
BRCA	HDAC1	3065	0	0.000965696
BRCA	RAPGEF4	11069	0	0.000961062
BRCA	RPS6	6194	0	0.00095811
BRCA	PABPC1	26986	0	0.000957671
BRCA	RPL7A	6130	0	0.000956804
BRCA	ASB12	142689	0	0.000943753
BRCA	PCNA	5111	0	0.000941167
BRCA	MEAF6	64769	0	0.000939628
BRCA	NPM1	4869	0	0.000938786
BRCA	SNRNP70	6625	0	0.000930034
BRCA	DHX15	1665	0	0.000926983
BRCA	C5	727	0	0.000917788
BRCA	LYN	4067	0	0.000913575
BRCA	CACTIN	58509	0	0.000913108
BRCA	SF3B1	23451	0	0.000912958
BRCA	AR	367	0	0.000896602
BRCA	RPL7	6129	0	0.00089383
BRCA	RPL6	6128	0	0.000892221
BRCA	HLA-B	3106	0	0.00088616
BRCA	MOV10	4343	0	0.000883935
BRCA	CSNK2A1	1457	0	0.000881748
BRCA	NCK1	4690	0	0.000879956
BRCA	KRT40	125115	0	0.000879501
BRCA	U2SURP	23350	0	0.000870832
BRCA	ABL1	25	0	0.000863507
BRCA	MTREX	23517	0	0.000859287
BRCA	ESS2	8220	0	0.000857592
BRCA	HNRNPU	3192	0	0.000856328
BRCA	RPS16	6217	0	0.000853276
BRCA	VIM	7431	0	0.000850762
BRCA	HSP90AB1	3326	0	0.000849531
BRCA	ATXN1	6310	0	0.000846945
BRCA	RPL11	6135	0	0.000846125
BRCA	PHB	5245	0	0.000844413
BRCA	TFIP11	24144	0	0.000843978
BRCA	RPL4	6124	0	0.000843183
BRCA	ARRB1	408	0	0.000840682
BRCA	FYN	2534	0	0.000840621
BRCA	ATR	545	0	0.000838699
BRCA	RPS3A	6189	0	0.000834962
BRCA	RPL19	6143	0	0.000831176
CESC	SEMA3B	7869	1	0.0229218
CESC	PTN	5764	1	0.0197211
CESC	PGR	5241	1	0.0196762
CESC	CXCL12	6387	1	0.0193025
CESC	SPP1	6696	1	0.0192412
CESC	ELN	2006	1	0.0192295
CESC	CXCL8	3576	1	0.0191117
CESC	CXCL1	2919	1	0.0189304
CESC	MEN1	4221	0	0.00357967
CESC	MYC	4609	0	0.00344074
CESC	LMO3	55885	0	0.00340301
CESC	EXOC1	55763	0	0.00337338
CESC	NOC4L	79050	0	0.00336942
CESC	DLL3	10683	0	0.00326092
CESC	COLEC12	81035	0	0.00324725
CESC	PHB2	11331	0	0.00291043
CESC	RPL22	6146	0	0.00280281
CESC	EPB41	2035	0	0.00270347
CESC	PIK3R2	5296	0	0.00256385
CESC	SNTA1	6640	0	0.00246888
CESC	ALDH3A1	218	0	0.00246271
CESC	GRB2	2885	0	0.00222385
CESC	MAPK6	5597	0	0.0019424
CESC	MTUS2	23281	0	0.00175002
CESC	DDX23	9416	0	0.00174267
CESC	DDX5	1655	0	0.00161823
CESC	SNRPD3	6634	0	0.00161579
CESC	CPSF6	11052	0	0.00159938
CESC	WBP11	51729	0	0.00155783
CESC	SRSF5	6430	0	0.00155658
CESC	YWHAE	7531	0	0.00154367
CESC	TCP1	6950	0	0.00153942
CESC	SMURF2	64750	0	0.00148685
CESC	HNRNPK	3190	0	0.00145558
CESC	LZTS2	84445	0	0.00143166
CESC	UBC	7316	0	0.00142864
CESC	MRPS2	51116	0	0.00141974
CESC	RPS2	6187	0	0.00141967
CESC	BARD1	580	0	0.00140089
CESC	TP53	7157	0	0.00139381
CESC	COPA	1314	0	0.00138171
CESC	REL	5966	0	0.0013788
CESC	SNU13	4809	0	0.00136741
CESC	RPS15	6209	0	0.0013385
CESC	ZBTB8A	653121	0	0.00132696
CESC	PABPC3	5042	0	0.00130936
CESC	TCOF1	6949	0	0.00130732
CESC	MAP2K5	5607	0	0.00129913
CESC	MCF2L	23263	0	0.00129337
CESC	TNIP3	79931	0	0.00125066
CESC	KRT31	3881	0	0.00125029
CESC	CRYBB3	1417	0	0.00124643
CESC	FAM9B	171483	0	0.00123553
CESC	MRPS36	92259	0	0.00122309
CESC	ACSL5	51703	0	0.00120708
CESC	YWHAZ	7534	0	0.00120121
CESC	DCTN1	1639	0	0.00118762
CESC	TNNT1	7138	0	0.00118601
CESC	COBLL1	22837	0	0.00117902
CESC	NDUFV3	4731	0	0.0011776
CESC	CDC5L	988	0	0.00117692
CESC	TRAF6	7189	0	0.00117689
CESC	AEN	64782	0	0.00113625
CESC	SART1	9092	0	0.00111989
CESC	SMARCC1	6599	0	0.00111105
CESC	CTNNBL1	56259	0	0.00110579
CESC	HDAC1	3065	0	0.00110202
CESC	RPL7	6129	0	0.00108437
CESC	ZMIZ1	57178	0	0.00106769
CESC	LRP6	4040	0	0.00106296
CESC	MAPK1	5594	0	0.00104929
CESC	SRC	6714	0	0.00104745
CESC	NPM1	4869	0	0.00103834
CESC	SP1	6667	0	0.00102449
CESC	YWHAG	7532	0	0.0010227
CESC	SF3B1	23451	0	0.00102045
CESC	SF3B2	10992	0	0.00100425
CESC	PRKCQ	5588	0	0.00100109
CESC	PAXBP1	94104	0	0.000982451
CESC	EEF1A1	1915	0	0.000979651
CESC	SF3B3	23450	0	0.000969537
CESC	EIF3K	27335	0	0.00096013
CESC	WAS	7454	0	0.000951853
CESC	IKBKG	8517	0	0.000945799
CESC	TUFM	7284	0	0.000934466
CESC	BRCA1	672	0	0.0009333
CESC	ACTG2	72	0	0.00093323
CESC	MRPS6	64968	0	0.000931784
CESC	DHX9	1660	0	0.000910634
CESC	ACTB	60	0	0.000900041
CESC	HNRNPM	4670	0	0.000898039
CESC	CHEK2	11200	0	0.000897103
CESC	VIM	7431	0	0.000895931
CESC	VCL	7414	0	0.000890478
CESC	PRKCZ	5590	0	0.00088951
CESC	CDK2	1017	0	0.000888798
CESC	USP21	27005	0	0.000885206
CESC	MRPL44	65080	0	0.000880991
CESC	EGFR	1956	0	0.000880067
CESC	RPS9	6203	0	0.000878029
CESC	TUBA3D	113457	0	0.000874823
CESC	PRKACA	5566	0	0.000873165
CESC	EIF3M	10480	0	0.000873033
CESC	MYH10	4628	0	0.000870329
CESC	ZGPAT	84619	0	0.000869994
CESC	RPS7	6201	0	0.000869836
CESC	HSP90AB1	3326	0	0.000865885
CESC	MRPL34	64981	0	0.000858121
CESC	IKBKE	9641	0	0.000857559
CESC	COL4A1	1282	0	0.000856009
CESC	RANBP1	5902	0	0.000851385
CESC	EFTUD2	9343	0	0.000846251
CESC	BMPR1B	658	0	0.000840748
CESC	MPP3	4356	0	0.000837143
CESC	SMAD2	4087	0	0.000832422
CESC	HSPA8	3312	0	0.000829325
CESC	PPP2R5A	5525	0	0.0008285
CESC	PPP1CB	5500	0	0.000827222
CESC	MAP4K5	11183	0	0.00082009
CESC	TRIM27	5987	0	0.000816567
CESC	RPL37A	6168	0	0.000816391
CESC	PABPC1	26986	0	0.000813385
CESC	TTC23	64927	0	0.000812204
CESC	EP300	2033	0	0.000806446
CESC	ESR1	2099	0	0.000805868
CESC	PRPF19	27339	0	0.000797028
CESC	DBNL	28988	0	0.000793597
CESC	PLCG1	5335	0	0.000792334
CESC	CGA	1081	0	0.00078968
CESC	SLC25A5	292	0	0.000787601
CESC	POLR2G	5436	0	0.000786318
CESC	KRT40	125115	0	0.000784855
CESC	RPL23	9349	0	0.000780528
CESC	GSK3B	2932	0	0.000779688
COAD	CXCL11	6373	1	0.00270054
COAD	CDH1	999	1	0.0025627
COAD	BMP7	655	1	0.00250609
COAD	WBP11	51729	0	0.00248867
COAD	PTN	5764	1	0.00248722
COAD	CXCL16	58191	1	0.00246207
COAD	HNF4A	3172	1	0.00245573
COAD	FOS	2353	0	0.00245182
COAD	TDGF1	6997	1	0.00243518
COAD	HSPA2	3306	1	0.00243451
COAD	MET	4233	1	0.00242417
COAD	LYZ	4069	1	0.0024218
COAD	GPR17	2840	1	0.00240416
COAD	NGFR	4804	1	0.00239033
COAD	LIFR	3977	1	0.00238359
COAD	INHBA	3624	1	0.00238038
COAD	DES	1674	1	0.00237906
COAD	FGFR1	2260	1	0.00235925
COAD	CSRP1	1465	1	0.00235794
COAD	VIP	7432	1	0.00232954
COAD	MMP9	4318	1	0.00232947
COAD	CNTFR	1271	1	0.00232125
COAD	FGFR2	2263	1	0.00231528
COAD	NPR1	4881	1	0.00230999
COAD	SDC1	6382	1	0.00230794
COAD	PTH1R	5745	1	0.00230514
COAD	ANGPTL1	9068	1	0.0023037
COAD	PTX3	5806	1	0.00230112
COAD	OGN	4969	1	0.00230086
COAD	CBLC	23624	1	0.00229708
COAD	IL2RG	3561	1	0.00229241
COAD	TNFRSF6B	8771	1	0.00229212
COAD	BIRC5	332	1	0.00228994
COAD	NFATC4	4776	1	0.00228992
COAD	SERPINA3	12	1	0.00228868
COAD	ROBO3	64221	1	0.00228677
COAD	CXCL12	6387	1	0.0022862
COAD	AGTR1	185	1	0.00228311
COAD	IL32	9235	1	0.00228199
COAD	TPM2	7169	1	0.00227567
COAD	MASP1	5648	1	0.00227367
COAD	PLAUR	5329	1	0.00226595
COAD	CXCL9	4283	1	0.00225951
COAD	BMP3	651	1	0.00225928
COAD	ACKR1	2532	1	0.00225578
COAD	CHGA	1113	1	0.00225353
COAD	SST	6750	1	0.0022529
COAD	CXCL8	3576	1	0.00225018
COAD	F2RL1	2150	1	0.00224876
COAD	PYY	5697	1	0.00224595
COAD	CXCL10	3627	1	0.00224169
COAD	TNFRSF12A	51330	1	0.00223741
COAD	GLP2R	9340	1	0.00223189
COAD	GRB2	2885	0	0.00222831
COAD	CCL14	6358	1	0.00222787
COAD	CLDN4	1364	1	0.00222784
COAD	CCL20	6364	1	0.00221974
COAD	IL22RA1	58985	1	0.00221871
COAD	PLXNB3	5365	1	0.00221855
COAD	CCL18	6362	1	0.00221828
COAD	AZGP1	563	1	0.00221673
COAD	AREG	374	1	0.00221601
COAD	CXCL1	2919	1	0.00221145
COAD	ESM1	11082	1	0.0022053
COAD	GDF15	9518	1	0.00220355
COAD	IL11RA	3590	1	0.00220202
COAD	CCL24	6369	1	0.0021957
COAD	GUCA2A	2980	1	0.00219143
COAD	GREM2	64388	1	0.0021909
COAD	CXCL3	2921	1	0.00219034
COAD	REG1A	5967	1	0.00218802
COAD	NOP58	51602	0	0.00218502
COAD	DEFA5	1670	1	0.00218455
COAD	CCDC114	93233	0	0.00216701
COAD	FRG1	2483	0	0.0021528
COAD	NA	285216	0	0.00203437
COAD	KRT40	125115	0	0.00185414
COAD	MTREX	23517	0	0.00179898
COAD	MYC	4609	0	0.00169238
COAD	YWHAZ	7534	0	0.00162136
COAD	DDX5	1655	0	0.00152334
COAD	DHX8	1659	0	0.00148248
COAD	RPL23	9349	0	0.00143726
COAD	PRKACA	5566	0	0.00140831
COAD	MRPL3	11222	0	0.00139716
COAD	RPL37A	6168	0	0.00134458
COAD	SRC	6714	0	0.00133569
COAD	TRA2B	6434	0	0.0013188
COAD	YWHAG	7532	0	0.00129242
COAD	RELA	5970	0	0.00128156
COAD	ZCCHC8	55596	0	0.00115289
COAD	MRPL34	64981	0	0.00114865
COAD	GNL3	26354	0	0.00114349
COAD	TRAF1	7185	0	0.00114287
COAD	EGFR	1956	0	0.00114242
COAD	TRAF6	7189	0	0.00113317
COAD	ATXN1	6310	0	0.00110286
COAD	APC	324	0	0.00108084
COAD	TP53	7157	0	0.00106947
COAD	U2AF1	7307	0	0.00106414
COAD	NCL	4691	0	0.00105946
COAD	EEF1A1	1915	0	0.00105007
COAD	HSPA8	3312	0	0.0010406
COAD	KIAA0408	9729	0	0.00104035
COAD	CDK2	1017	0	0.00102758
COAD	SF3B3	23450	0	0.00100973
COAD	HNRNPK	3190	0	0.00100905
COAD	MAPK9	5601	0	0.000991666
COAD	HDAC1	3065	0	0.00098703
COAD	SMAD3	4088	0	0.000984889
COAD	ILF3	3609	0	0.000981928
COAD	SF3B1	23451	0	0.000980431
COAD	SNRPA	6626	0	0.00097935
COAD	SRSF1	6426	0	0.000975702
COAD	PABPC1	26986	0	0.000968421
COAD	GSK3B	2932	0	0.00095447
COAD	PIK3R1	5295	0	0.000951877
COAD	PRKCZ	5590	0	0.00094465
COAD	SP1	6667	0	0.000936134
COAD	DHX9	1660	0	0.000927767
COAD	HSP90AB1	3326	0	0.000926972
COAD	CREB3	10488	0	0.000910996
COAD	IKBKE	9641	0	0.000905748
COAD	RPLP0	6175	0	0.000900376
COAD	SRSF11	9295	0	0.000890069
COAD	MRPS17	51373	0	0.000886105
COAD	AR	367	0	0.000882622
COAD	YBX1	4904	0	0.000871733
COAD	FYN	2534	0	0.000868829
COAD	TFIP11	24144	0	0.000868774
COAD	RPL26	6154	0	0.000865562
COAD	PRKACG	5568	0	0.000864967
COAD	POLR2A	5430	0	0.00086463
COAD	GTF3C4	9329	0	0.000862872
ESCA	CXCL11	6373	1	0.00346543
ESCA	CD74	972	1	0.00340162
ESCA	ISG15	9636	1	0.00338052
ESCA	STAT1	6772	1	0.0032415
ESCA	CXCL2	2920	1	0.00323204
ESCA	PTN	5764	1	0.00312198
ESCA	INSR	3643	1	0.00311842
ESCA	HNF4A	3172	1	0.00308013
ESCA	MET	4233	1	0.00307195
ESCA	INHBA	3624	1	0.00303007
ESCA	SYTL1	84958	1	0.00302929
ESCA	FGFR3	2261	1	0.0030281
ESCA	ITGAV	3685	1	0.00302352
ESCA	DES	1674	1	0.00302101
ESCA	LYZ	4069	1	0.00299655
ESCA	EIF2AK2	5610	1	0.00299034
ESCA	CXCR2	3579	1	0.00298978
ESCA	ICAM1	3383	1	0.00298926
ESCA	IL34	146433	1	0.00298225
ESCA	CXCL13	10563	1	0.00298116
ESCA	MEOX2	4223	0	0.00296807
ESCA	FCER1G	2207	1	0.00296248
ESCA	AGT	183	1	0.00295856
ESCA	MDK	4192	1	0.00294805
ESCA	MMP9	4318	1	0.0029468
ESCA	IL32	9235	1	0.00291478
ESCA	SPP1	6696	1	0.00290177
ESCA	CXCL5	6374	1	0.00290121
ESCA	CTSE	1510	1	0.00289917
ESCA	F2R	2149	1	0.00289679
ESCA	DMBT1	1755	1	0.00289628
ESCA	IL36RN	26525	1	0.00289116
ESCA	HNF4G	3174	1	0.00288995
ESCA	IDO1	3620	1	0.00288755
ESCA	CXCL9	4283	1	0.00288576
ESCA	PLAUR	5329	1	0.00288498
ESCA	PLAU	5328	1	0.00288448
ESCA	ACKR1	2532	1	0.00287452
ESCA	WBP11	51729	0	0.00286828
ESCA	F2RL1	2150	1	0.00286329
ESCA	CXCL8	3576	1	0.00286201
ESCA	TNFRSF12A	51330	1	0.00285526
ESCA	CXCL10	3627	1	0.00285297
ESCA	FCGR3A	2214	1	0.00285208
ESCA	IL1RN	3557	1	0.00284957
ESCA	CCL14	6358	1	0.00284087
ESCA	CCL20	6364	1	0.00283399
ESCA	CCL18	6362	1	0.00282689
ESCA	EDN3	1908	1	0.00282082
ESCA	CXCL1	2919	1	0.00281837
ESCA	GDF15	9518	1	0.00281071
ESCA	SEMA3C	10512	1	0.00281069
ESCA	LTB4R	1241	1	0.00279861
ESCA	CXCL3	2921	1	0.00279672
ESCA	REG1A	5967	1	0.00279403
ESCA	SPINK5	11005	1	0.00279134
ESCA	PSIP1	11168	0	0.00264608
ESCA	NA	285216	0	0.00257886
ESCA	GRB2	2885	0	0.0021663
ESCA	MTREX	23517	0	0.00214977
ESCA	LCK	3932	0	0.00198089
ESCA	DHX8	1659	0	0.00164384
ESCA	PTK2	5747	0	0.00160669
ESCA	HNRNPD	3184	0	0.001515
ESCA	IKBKG	8517	0	0.00147424
ESCA	UBC	7316	0	0.00141825
ESCA	YWHAZ	7534	0	0.00140568
ESCA	CDK2	1017	0	0.00137502
ESCA	DHX9	1660	0	0.00136463
ESCA	TRIM29	23650	0	0.00132792
ESCA	SLC25A5	292	0	0.00131366
ESCA	YWHAG	7532	0	0.00130364
ESCA	SRC	6714	0	0.00125847
ESCA	MYC	4609	0	0.00125722
ESCA	SRPK1	6732	0	0.00124971
ESCA	EGFR	1956	0	0.00121932
ESCA	MAP3K1	4214	0	0.00120264
ESCA	RPL11	6135	0	0.00120198
ESCA	DDX5	1655	0	0.00116552
ESCA	ILF3	3609	0	0.00114192
ESCA	TP53	7157	0	0.0011385
ESCA	GRIN2B	2904	0	0.00113365
ESCA	HDAC1	3065	0	0.00113073
ESCA	GNL3	26354	0	0.00112914
ESCA	U2AF1	7307	0	0.00110939
ESCA	RPS4X	6191	0	0.00110821
ESCA	EEF1A1	1915	0	0.00110256
ESCA	TRAF6	7189	0	0.00106284
ESCA	VIM	7431	0	0.00105738
ESCA	PRMT5	10419	0	0.0010467
ESCA	GSK3B	2932	0	0.00104489
ESCA	SF3B3	23450	0	0.00103125
ESCA	RPL26	6154	0	0.00102888
ESCA	EWSR1	2130	0	0.000996422
ESCA	PRKACA	5566	0	0.000992582
ESCA	FYN	2534	0	0.000991625
ESCA	RAF1	5894	0	0.000966934
ESCA	SF3B1	23451	0	0.000966183
ESCA	RPL31	6160	0	0.000963097
ESCA	RPS8	6202	0	0.000933054
ESCA	RPL37A	6168	0	0.000918664
ESCA	NPM1	4869	0	0.000917303
ESCA	EPB41	2035	0	0.000915262
ESCA	TRAF1	7185	0	0.000914653
ESCA	PRKCZ	5590	0	0.00091309
ESCA	SMARCA2	6595	0	0.000907104
ESCA	SFN	2810	0	0.000904699
ESCA	RELA	5970	0	0.000899072
ESCA	RB1	5925	0	0.000897985
ESCA	RPL4	6124	0	0.000896913
ESCA	PABPC1	26986	0	0.000889074
ESCA	USP39	10713	0	0.000883313
ESCA	NLRC4	58484	0	0.000881801
ESCA	PHB2	11331	0	0.000880656
ESCA	RPL24	6152	0	0.000877756
ESCA	SP1	6667	0	0.000875877
ESCA	UBE2M	9040	0	0.000875668
ESCA	JUN	3725	0	0.000874842
ESCA	MAP3K3	4215	0	0.000868264
ESCA	CSNK2A1	1457	0	0.0008658
ESCA	SRSF1	6426	0	0.000865138
ESCA	HSP90AB1	3326	0	0.000862418
ESCA	RPL7	6129	0	0.000862405
ESCA	ARRB2	409	0	0.000859977
ESCA	RNPS1	10921	0	0.000857818
ESCA	MAPK6	5597	0	0.000856084
ESCA	HNRNPA1	3178	0	0.000854447
ESCA	IGF2BP3	10643	0	0.000852508
ESCA	IKBKE	9641	0	0.000844911
ESCA	GOLGA2	2801	0	0.000842862
ESCA	MRPS25	64432	0	0.000842484
ESCA	KRT40	125115	0	0.00084224
ESCA	AR	367	0	0.000839817
ESCA	SYF2	25949	0	0.000837575
GBM	VIM	7431	1	0.00786476
GBM	GFAP	2670	1	0.00745355
GBM	CMTM3	123920	1	0.00735075
GBM	FGF13	2258	1	0.00728743
GBM	CD74	972	1	0.00698677
GBM	ITGB2	3689	1	0.0069662
GBM	FCER1G	2207	1	0.00690829
GBM	APLN	8862	1	0.00690439
GBM	CXCR4	7852	1	0.00687715
GBM	MDK	4192	1	0.00686094
GBM	CHGB	1114	1	0.00684409
GBM	SERPINA3	12	1	0.0068111
GBM	SSTR1	6751	1	0.00678769
GBM	ADM	133	1	0.00678692
GBM	NAMPT	10135	1	0.00677702
GBM	SPP1	6696	1	0.00673086
GBM	SST	6750	1	0.00672523
GBM	CCK	885	1	0.00671354
GBM	TNFRSF12A	51330	1	0.00667753
GBM	FCGR3A	2214	1	0.00664346
GBM	GDF15	9518	1	0.00658749
GBM	APLNR	187	1	0.00655068
GBM	RNASE2	6036	1	0.00654154
GBM	U2AF2	11338	0	0.0064307
GBM	RPL22	6146	0	0.00623067
GBM	GRB2	2885	0	0.00212421
GBM	KRTAP10-7	386675	0	0.00201256
GBM	GNL3	26354	0	0.00201189
GBM	RPS16	6217	0	0.00192911
GBM	RPL11	6135	0	0.001755
GBM	UBE2M	9040	0	0.00171653
GBM	RNF149	284996	0	0.00169794
GBM	U2AF1	7307	0	0.00168322
GBM	SF3B3	23450	0	0.00164335
GBM	MRPS25	64432	0	0.00161486
GBM	PPP2R5A	5525	0	0.00155894
GBM	CCNK	8812	0	0.00153768
GBM	SRSF2	6427	0	0.00152684
GBM	YBX1	4904	0	0.00151107
GBM	SPTAN1	6709	0	0.00150164
GBM	SLC25A5	292	0	0.00149649
GBM	REN	5972	0	0.00148125
GBM	CFAP206	154313	0	0.00142569
GBM	RPL31	6160	0	0.00140559
GBM	CDK2	1017	0	0.00140041
GBM	EGFR	1956	0	0.00139949
GBM	BUD13	84811	0	0.00139744
GBM	BRCA1	672	0	0.00137488
GBM	HNRNPK	3190	0	0.00136683
GBM	SUPT16H	11198	0	0.00136347
GBM	MAPK6	5597	0	0.00135665
GBM	SRSF1	6426	0	0.00132379
GBM	MAPK1	5594	0	0.00132141
GBM	GSK3B	2932	0	0.00130964
GBM	HSPA8	3312	0	0.00130535
GBM	RPS6	6194	0	0.00130031
GBM	CEBPB	1051	0	0.00124222
GBM	PABPC1	26986	0	0.00123962
GBM	EEF1A1	1915	0	0.00122983
GBM	FAM9B	171483	0	0.00119853
GBM	MRPL13	28998	0	0.00118487
GBM	VCL	7414	0	0.00117237
GBM	PSME1	5720	0	0.00115252
GBM	YWHAZ	7534	0	0.00115143
GBM	DDX5	1655	0	0.00114392
GBM	NT5C	30833	0	0.00114391
GBM	NECAB2	54550	0	0.00113516
GBM	TP53	7157	0	0.00113084
GBM	SH3KBP1	30011	0	0.00112789
GBM	YWHAB	7529	0	0.00111705
GBM	TRAF6	7189	0	0.00111347
GBM	FGFR3	2261	0	0.00110058
GBM	PRKAR2A	5576	0	0.00110011
GBM	GADD45G	10912	0	0.00108693
GBM	DDX46	9879	0	0.00107694
GBM	CAMK1	8536	0	0.0010735
GBM	GLYR1	84656	0	0.00106615
GBM	NUP62	23636	0	0.00106101
GBM	YWHAG	7532	0	0.0010603
GBM	RPL24	6152	0	0.00105757
GBM	IKBKE	9641	0	0.00105224
GBM	MAT1A	4143	0	0.00104207
GBM	STX3	6809	0	0.00103174
GBM	FXR2	9513	0	0.00102788
GBM	TCERG1	10915	0	0.00102549
GBM	HNRNPC	3183	0	0.00101648
GBM	RPL21	6144	0	0.00101529
GBM	UBC	7316	0	0.00101499
GBM	SRC	6714	0	0.00101351
GBM	DDX21	9188	0	0.00101153
GBM	COL13A1	1305	0	0.00100406
GBM	SP3	6670	0	0.00100333
GBM	HNRNPL	3191	0	0.00100322
GBM	C1QC	714	0	0.000979891
GBM	EIF4B	1975	0	0.000978234
GBM	JUN	3725	0	0.000960744
GBM	DHX9	1660	0	0.000952149
GBM	MYC	4609	0	0.000945398
GBM	FYN	2534	0	0.000933927
GBM	RPL7A	6130	0	0.00092077
GBM	NPM1	4869	0	0.000893234
GBM	ZNF234	10780	0	0.000892591
GBM	SF3B1	23451	0	0.000892169
GBM	TCF4	6925	0	0.000890536
GBM	DHX38	9785	0	0.000884962
GBM	PRKACA	5566	0	0.000879472
GBM	TRIM27	5987	0	0.00087244
GBM	VIRMA	25962	0	0.000868457
GBM	MRPL18	29074	0	0.000867239
GBM	PTPMT1	114971	0	0.000865896
GBM	CXCR3	2833	0	0.000863888
GBM	IKBKG	8517	0	0.00085975
GBM	ACTB	60	0	0.000857136
GBM	RPS3A	6189	0	0.000853473
GBM	DAB1	1600	0	0.000839237
GBM	CRNKL1	51340	0	0.000834691
GBM	PIK3R1	5295	0	0.000828986
GBM	DHX15	1665	0	0.000828332
GBM	ARRB2	409	0	0.000821375
GBM	ALYREF	10189	0	0.00082124
GBM	ESR1	2099	0	0.000819311
GBM	RPS9	6203	0	0.000819144
GBM	HNRNPU	3192	0	0.000814342
GBM	KRT40	125115	0	0.000808888
GBM	RPL7	6129	0	0.000805309
GBM	CDC5L	988	0	0.000803335
GBM	PRKCA	5578	0	0.000790035
GBM	GOLGA2	2801	0	0.000789602
GBM	HLA-B	3106	0	0.000787125
GBM	RPL35A	6165	0	0.000785759
GBM	HDAC1	3065	0	0.000780139
GBM	CSNK2A1	1457	0	0.000776103
GBM	NCL	4691	0	0.000775996
GBM	SRSF6	6431	0	0.000773187
KICH	CLDN4	1364	1	0.15302
KICH	GTF2F2	2963	0	0.0273955
KICH	U2SURP	23350	0	0.0271863
KICH	HDAC5	10014	0	0.0270217
KICH	E2F3	1871	0	0.0268204
KICH	RICTOR	253260	0	0.0267499
KICH	GRB2	2885	0	0.00280602
KICH	HMGA1	3159	0	0.00236426
KICH	HNRNPC	3183	0	0.00218958
KICH	SF3B2	10992	0	0.00182396
KICH	YBX1	4904	0	0.00174738
KICH	CREB3	10488	0	0.001743
KICH	RPL18	6141	0	0.00168037
KICH	RPS3	6188	0	0.0016445
KICH	SMAD3	4088	0	0.00163774
KICH	AKT1	207	0	0.00163418
KICH	NTAQ1	55093	0	0.00149572
KICH	RBM17	84991	0	0.00147754
KICH	MAPK9	5601	0	0.00144257
KICH	HNRNPR	10236	0	0.00139237
KICH	ACTA1	58	0	0.00138294
KICH	GTF2H4	2968	0	0.00137172
KICH	DDX20	11218	0	0.00137055
KICH	JAK2	3717	0	0.00135571
KICH	AKT3	10000	0	0.00134537
KICH	MCM5	4174	0	0.00132757
KICH	MRPL41	64975	0	0.00131776
KICH	NFKBIB	4793	0	0.0013005
KICH	ZNF24	7572	0	0.00129316
KICH	UQCRC1	7384	0	0.00128931
KICH	ZFYVE9	9372	0	0.00125985
KICH	LZTR1	8216	0	0.00125969
KICH	PSMD10	5716	0	0.0012569
KICH	CSNK2A1	1457	0	0.0012516
KICH	GHR	2690	0	0.00124314
KICH	ATXN7L1	222255	0	0.00122189
KICH	PRKCA	5578	0	0.00121935
KICH	IL16	3603	0	0.00121068
KICH	IDH3B	3420	0	0.00120964
KICH	BUB1	699	0	0.0012069
KICH	TLE4	7091	0	0.00119484
KICH	DAPK3	1613	0	0.00119482
KICH	EIF4G2	1982	0	0.00119162
KICH	EEF1A1	1915	0	0.00118819
KICH	CCR4	1233	0	0.00117292
KICH	CSF2RA	1438	0	0.00113913
KICH	NPM1	4869	0	0.00112547
KICH	ICAM4	3386	0	0.00112103
KICH	LYPLA1	10434	0	0.00111815
KICH	SVEP1	79987	0	0.0011058
KICH	YWHAZ	7534	0	0.00106504
KICH	HSP90AB1	3326	0	0.00104994
KICH	SRC	6714	0	0.00104598
KICH	SF3B3	23450	0	0.0010271
KICH	HDAC1	3065	0	0.00102351
KICH	PRKACA	5566	0	0.000983715
KICH	TP53	7157	0	0.000978121
KICH	PABPC1	26986	0	0.000974066
KICH	SMAD2	4087	0	0.000938561
KICH	ACTB	60	0	0.000915043
KICH	TRAF6	7189	0	0.000883355
KICH	EGFR	1956	0	0.000868437
KICH	RPL7A	6130	0	0.000864801
KICH	MDFI	4188	0	0.000854506
KICH	ILF2	3608	0	0.00085414
KICH	YWHAG	7532	0	0.000851946
KICH	RPL11	6135	0	0.000850376
KICH	DHX9	1660	0	0.000844866
KICH	DDB1	1642	0	0.000831841
KICH	CDK2	1017	0	0.000829837
KICH	APC	324	0	0.00082578
KICH	TRAF2	7186	0	0.000824308
KICH	MYC	4609	0	0.000819452
KICH	RUVBL2	10856	0	0.000817957
KICH	BCAS2	10286	0	0.0008061
KICH	JUN	3725	0	0.000797613
KICH	NCBP1	4686	0	0.000795019
KICH	DDX5	1655	0	0.000795007
KICH	SF3B4	10262	0	0.000792321
KICH	SRSF1	6426	0	0.000791035
KICH	RPS18	6222	0	0.000790404
KICH	RPL6	6128	0	0.00078913
KICH	SLC4A5	57835	0	0.00077536
KICH	GOLGA2	2801	0	0.000772493
KICH	HNRNPU	3192	0	0.000769798
KICH	HSPD1	3329	0	0.000766346
KICH	SF3B1	23451	0	0.00076177
KICH	EPS8	2059	0	0.00075494
KICH	IKBKE	9641	0	0.000754903
KICH	HSPA8	3312	0	0.000746433
KICH	DDX18	8886	0	0.000741181
KICH	CDK12	51755	0	0.00073933
KICH	CREBBP	1387	0	0.000736817
KICH	ADCY1	107	0	0.000736807
KICH	SP1	6667	0	0.000733181
KICH	CDKN2A	1029	0	0.000729025
KICH	RPS8	6202	0	0.000723951
KICH	DIABLO	56616	0	0.000722741
KICH	SF3A2	8175	0	0.000721206
KICH	RPL35A	6165	0	0.000720128
KICH	IKBKG	8517	0	0.000719457
KICH	SLC25A3	5250	0	0.000716817
KICH	RPL14	9045	0	0.000715139
KICH	EEF2	1938	0	0.00070978
KICH	RPL8	6132	0	0.000709537
KICH	TUBB	203068	0	0.000704496
KICH	KRT40	125115	0	0.000702911
KICH	SFN	2810	0	0.000701502
KICH	DICER1	23405	0	0.000698378
KICH	RPLP0	6175	0	0.000695624
KICH	DDX3X	1654	0	0.000695004
KICH	RPS3A	6189	0	0.00069493
KICH	KRTAP10-3	386682	0	0.000688843
KICH	HLA-B	3106	0	0.000688599
KICH	SLU7	10569	0	0.000687476
KICH	FYN	2534	0	0.000678522
KICH	SMNDC1	10285	0	0.000677572
KICH	RPS9	6203	0	0.00067498
KICH	UBC	7316	0	0.000674057
KICH	ARRB2	409	0	0.000673142
KICH	CTNNB1	1499	0	0.00067234
KICH	RSL1D1	26156	0	0.000670695
KICH	SYF2	25949	0	0.000668115
KICH	KAT5	10524	0	0.000662196
KICH	RPS19	6223	0	0.000658849
KICH	PML	5371	0	0.000658709
KICH	EIF1B	10289	0	0.000652806
KICH	U2AF2	11338	0	0.000647031
KICH	POLR1A	25885	0	0.000644692
KICH	CALM1	801	0	0.00064328
KICH	YWHAH	7533	0	0.000636926
KICH	MAPK8	5599	0	0.000636868
KICH	GCN1	10985	0	0.00063374
KICH	FBL	2091	0	0.000624452
KIRC	APLN	8862	1	0.0158489
KIRC	PGF	5228	1	0.0158092
KIRC	PTHLH	5744	1	0.0157289
KIRC	STC2	8614	1	0.0156179
KIRC	INHBB	3625	1	0.0155194
KIRC	IDO1	3620	1	0.0154673
KIRC	KNG1	3827	1	0.0154175
KIRC	CXCL10	3627	1	0.0153264
KIRC	FCGR3A	2214	1	0.0152422
KIRC	GCGR	2642	1	0.0151924
KIRC	FYN	2534	0	0.00531525
KIRC	DHX8	1659	0	0.00486487
KIRC	FBLN2	2199	0	0.004499
KIRC	SNW1	22938	0	0.00285594
KIRC	YWHAE	7531	0	0.00266526
KIRC	RASA1	5921	0	0.00250061
KIRC	CYFIP1	23191	0	0.00237823
KIRC	SIRT6	51548	0	0.00232584
KIRC	SF3B3	23450	0	0.00229622
KIRC	TBC1D3	729873	0	0.00227586
KIRC	GRB2	2885	0	0.00219253
KIRC	HSP90AB1	3326	0	0.00216615
KIRC	ATXN1	6310	0	0.00215601
KIRC	MAPK1	5594	0	0.00213155
KIRC	BRCA1	672	0	0.00213083
KIRC	CDK2	1017	0	0.00203876
KIRC	DDX5	1655	0	0.00197439
KIRC	ZBTB8A	653121	0	0.00191092
KIRC	AKT2	208	0	0.00188931
KIRC	BUD13	84811	0	0.0018704
KIRC	CRKL	1399	0	0.00184714
KIRC	MAD2L1	4085	0	0.00184071
KIRC	DDX21	9188	0	0.00181916
KIRC	MRPL18	29074	0	0.00175762
KIRC	SYTL5	94122	0	0.00174959
KIRC	MMP14	4323	0	0.0017426
KIRC	DAB1	1600	0	0.00171446
KIRC	NR1H4	9971	0	0.00170709
KIRC	SRRM2	23524	0	0.00170158
KIRC	MAP3K12	7786	0	0.00169449
KIRC	HNRNPA1	3178	0	0.00166188
KIRC	SHC1	6464	0	0.00165312
KIRC	DNAJC8	22826	0	0.00165131
KIRC	U2AF1	7307	0	0.00164161
KIRC	PLAT	5327	0	0.00162186
KIRC	GUCY2F	2986	0	0.00160637
KIRC	FXR2	9513	0	0.00156473
KIRC	PHLDB2	90102	0	0.00153434
KIRC	CUL2	8453	0	0.00152675
KIRC	VIRMA	25962	0	0.00151527
KIRC	RPS23	6228	0	0.001452
KIRC	TJP1	7082	0	0.00143764
KIRC	RTN4	57142	0	0.00142503
KIRC	MRPS24	64951	0	0.00141264
KIRC	PRPF19	27339	0	0.0013937
KIRC	HADHA	3030	0	0.00137882
KIRC	VCL	7414	0	0.00136687
KIRC	RPS24	6229	0	0.00136665
KIRC	WTAP	9589	0	0.00136548
KIRC	CEP126	57562	0	0.00135692
KIRC	ADAMTSL4	54507	0	0.00134794
KIRC	THAP10	56906	0	0.00134157
KIRC	MRPS16	51021	0	0.0013375
KIRC	FCGR1A	2209	0	0.00132772
KIRC	HPRT1	3251	0	0.00132103
KIRC	MRPL54	116541	0	0.0013169
KIRC	CALM2	805	0	0.00131126
KIRC	POU5F1	5460	0	0.00130782
KIRC	RCHY1	25898	0	0.00128961
KIRC	MRPL46	26589	0	0.00128956
KIRC	AKT3	10000	0	0.00128709
KIRC	CKMT1B	1159	0	0.00127703
KIRC	INPP5E	56623	0	0.0012727
KIRC	ACOT13	55856	0	0.00125286
KIRC	RO60	6738	0	0.00125131
KIRC	H4C14	8370	0	0.0012422
KIRC	RBM7	10179	0	0.00123677
KIRC	YWHAZ	7534	0	0.00123505
KIRC	EIF6	3692	0	0.00122465
KIRC	ETV5	2119	0	0.0012244
KIRC	ARRB2	409	0	0.00122138
KIRC	JAK1	3716	0	0.00121274
KIRC	YWHAG	7532	0	0.0011835
KIRC	HNRNPH2	3188	0	0.00118266
KIRC	GABRB2	2561	0	0.00117161
KIRC	RPL34	6164	0	0.00116948
KIRC	CIITA	4261	0	0.00116093
KIRC	TRIM27	5987	0	0.00115951
KIRC	NCK2	8440	0	0.0011511
KIRC	HARS1	3035	0	0.00115022
KIRC	SRC	6714	0	0.00114952
KIRC	PSMB3	5691	0	0.00113162
KIRC	PHYHIP	9796	0	0.00108973
KIRC	EEF1A1	1915	0	0.00107397
KIRC	TRAF6	7189	0	0.00106832
KIRC	NMI	9111	0	0.00106716
KIRC	MED30	90390	0	0.00106293
KIRC	MKNK1	8569	0	0.00105873
KIRC	ADCY4	196883	0	0.00105067
KIRC	BAIAP2	10458	0	0.00102682
KIRC	PNLIPRP2	5408	0	0.00102645
KIRC	ACAP1	9744	0	0.00102628
KIRC	TP53	7157	0	0.00100272
KIRC	FGG	2266	0	0.000989362
KIRC	RPL10	6134	0	0.000988174
KIRC	RAB5B	5869	0	0.000979892
KIRC	SALL2	6297	0	0.000974373
KIRC	FFAR2	2867	0	0.000967568
KIRC	MYC	4609	0	0.000967349
KIRC	EGFR	1956	0	0.000947289
KIRC	RPL21	6144	0	0.0009244
KIRC	NAP1L1	4673	0	0.000908315
KIRC	EIF4A3	9775	0	0.000903943
KIRC	TUBA1A	7846	0	0.000876592
KIRC	IKBKE	9641	0	0.000875511
KIRC	RPL23	9349	0	0.000861033
KIRC	RPS13	6207	0	0.000860716
KIRC	TRIR	79002	0	0.000860666
KIRC	SF3B1	23451	0	0.00085838
KIRC	KRT40	125115	0	0.000853126
KIRC	SF1	7536	0	0.000847388
KIRC	LSM7	51690	0	0.00084
KIRC	SP1	6667	0	0.000836108
KIRC	PABPC1	26986	0	0.000829948
KIRC	SMAD2	4087	0	0.000828798
KIRC	HDAC1	3065	0	0.000826512
KIRC	IKBKG	8517	0	0.00082301
KIRC	TRAF2	7186	0	0.000814358
KIRC	HSPA8	3312	0	0.000806772
KIRC	DHX9	1660	0	0.000803988
KIRC	ESR1	2099	0	0.000801626
KIRC	UBC	7316	0	0.000798965
KIRC	PELP1	27043	0	0.000798627
KIRC	PACSIN1	29993	0	0.000795135
KIRP	ALB	213	1	0.00816282
KIRP	NR0B2	8431	1	0.00808575
KIRP	NR2F1	7025	1	0.00803521
KIRP	PDGFRB	5159	1	0.00799099
KIRP	SOCS1	8651	1	0.00792365
KIRP	PTGER3	5733	1	0.00791605
KIRP	IL32	9235	1	0.00786704
KIRP	SERPINA3	12	1	0.00778474
KIRP	KNG1	3827	1	0.00778105
KIRP	ARG2	384	1	0.00777958
KIRP	CCL21	6366	1	0.00777743
KIRP	PDGFRA	5156	1	0.0077475
KIRP	FLT4	2324	1	0.00771439
KIRP	KITLG	4254	1	0.00764285
KIRP	CRLF1	9244	1	0.00763981
KIRP	IL1R2	7850	1	0.00762908
KIRP	IL1RL1	9173	1	0.00762644
KIRP	PTGER1	5731	1	0.00760466
KIRP	GCGR	2642	1	0.00759896
KIRP	MARCO	8685	1	0.00757115
KIRP	NA	285216	0	0.00690901
KIRP	MRPS26	64949	0	0.00386131
KIRP	PXN	5829	0	0.00358696
KIRP	KRTAP10-8	386681	0	0.00312964
KIRP	FYN	2534	0	0.00302122
KIRP	DHX8	1659	0	0.00262438
KIRP	HSP90AB1	3326	0	0.00259078
KIRP	NUP62	23636	0	0.00243461
KIRP	GRB2	2885	0	0.00238112
KIRP	RPL35	11224	0	0.00230154
KIRP	FBLN2	2199	0	0.00227312
KIRP	PTPRZ1	5803	0	0.0022523
KIRP	CALM1	801	0	0.00214201
KIRP	RPS3A	6189	0	0.00208845
KIRP	SHC1	6464	0	0.00207917
KIRP	TK1	7083	0	0.00204907
KIRP	PRPF18	8559	0	0.00195762
KIRP	SYF2	25949	0	0.00187075
KIRP	CCNC	892	0	0.00180866
KIRP	OSTF1	26578	0	0.00176439
KIRP	ZNF670	93474	0	0.00169611
KIRP	ACTB	60	0	0.001682
KIRP	RPL30	6156	0	0.00155266
KIRP	YWHAG	7532	0	0.00153174
KIRP	EEF1A1	1915	0	0.00145856
KIRP	MOV10	4343	0	0.00142159
KIRP	MEOX1	4222	0	0.00142096
KIRP	CACTIN	58509	0	0.0013668
KIRP	TP53	7157	0	0.0013619
KIRP	MAEA	10296	0	0.00135392
KIRP	RPS8	6202	0	0.00134409
KIRP	PRKACA	5566	0	0.00124495
KIRP	YWHAZ	7534	0	0.00122596
KIRP	EGFR	1956	0	0.00121059
KIRP	ITGB1	3688	0	0.00120765
KIRP	RPS14	6208	0	0.00119786
KIRP	DDX47	51202	0	0.00119677
KIRP	TRAF6	7189	0	0.00119417
KIRP	PABPC1	26986	0	0.0011772
KIRP	RPL37A	6168	0	0.00116616
KIRP	KRTAP10-9	386676	0	0.00116179
KIRP	SRC	6714	0	0.00115244
KIRP	HSPA8	3312	0	0.00115071
KIRP	PSMA6	5687	0	0.00114936
KIRP	SF3B3	23450	0	0.00114088
KIRP	SNRPA1	6627	0	0.00110954
KIRP	U2AF1	7307	0	0.0011035
KIRP	TRIM27	5987	0	0.00110345
KIRP	RELA	5970	0	0.00107828
KIRP	NPM1	4869	0	0.00104975
KIRP	IKBKE	9641	0	0.00103125
KIRP	IKBKG	8517	0	0.00102222
KIRP	H2AX	3014	0	0.00101816
KIRP	ARRB2	409	0	0.000994181
KIRP	OSM	5008	0	0.000989796
KIRP	CDK2	1017	0	0.000985633
KIRP	TARS1	6897	0	0.000964062
KIRP	UBE2D1	7321	0	0.000950462
KIRP	MYC	4609	0	0.000941357
KIRP	TAF9	6880	0	0.000936242
KIRP	RPL7	6129	0	0.000933655
KIRP	FLG2	388698	0	0.000932173
KIRP	UBC	7316	0	0.00092225
KIRP	RPL23	9349	0	0.000908777
KIRP	SF3B1	23451	0	0.00090149
KIRP	ARRB1	408	0	0.000872016
KIRP	U2SURP	23350	0	0.000867371
KIRP	NFKB1	4790	0	0.000864425
KIRP	RPL12	6136	0	0.000849471
KIRP	EIF4A3	9775	0	0.00084787
KIRP	RB1	5925	0	0.000839766
KIRP	DHX9	1660	0	0.000837897
KIRP	UBE2N	7334	0	0.000833746
KIRP	KRTAP9-2	83899	0	0.000829491
KIRP	RPLP0	6175	0	0.000823046
KIRP	GSK3B	2932	0	0.000821655
KIRP	RPL11	6135	0	0.00082065
KIRP	CSNK2A1	1457	0	0.000816916
KIRP	RPS27A	6233	0	0.000813111
KIRP	SP1	6667	0	0.000807793
KIRP	CDK1	983	0	0.000803007
KIRP	PDIA3	2923	0	0.000795988
KIRP	PLCG1	5335	0	0.00079261
KIRP	RGS2	5997	0	0.000791142
KIRP	JUN	3725	0	0.000791049
KIRP	HNRNPU	3192	0	0.000786778
KIRP	APC	324	0	0.000785542
KIRP	RPL28	6158	0	0.000785464
KIRP	KRTAP10-3	386682	0	0.000782006
KIRP	EXOSC5	56915	0	0.000781538
KIRP	U2AF2	11338	0	0.000779372
KIRP	HDAC1	3065	0	0.00077638
KIRP	RPL29	6159	0	0.00077466
KIRP	KRT40	125115	0	0.000774539
KIRP	MAPK1	5594	0	0.000771616
KIRP	ABL1	25	0	0.000769119
KIRP	BCL2	596	0	0.000768828
KIRP	SNRNP40	9410	0	0.00076817
KIRP	RPS9	6203	0	0.000765855
KIRP	RPS5	6193	0	0.000764506
KIRP	PRKCA	5578	0	0.000762229
KIRP	ESR1	2099	0	0.000754074
KIRP	MTREX	23517	0	0.00074994
KIRP	RPS7	6201	0	0.000749878
KIRP	DDX5	1655	0	0.000747105
KIRP	CFTR	1080	0	0.000743462
KIRP	RPL18A	6142	0	0.000741733
KIRP	PHB	5245	0	0.000735045
KIRP	RPL10	6134	0	0.000733765
KIRP	TRAF2	7186	0	0.000728287
KIRP	RPS13	6207	0	0.000727045
KIRP	ILF2	3608	0	0.000725385
KIRP	TUBB	203068	0	0.000724983
KIRP	USP3	9960	0	0.000724827
LGG	EGFR	1956	1	0.00335247
LGG	DDX5	1655	0	0.00272573
LGG	TGFBR1	7046	1	0.00270036
LGG	FPR1	2357	1	0.00264757
LGG	SYK	6850	1	0.00262574
LGG	CD86	942	1	0.0026194
LGG	CD4	920	1	0.00260393
LGG	ITGB2	3689	1	0.00259974
LGG	CDK4	1019	1	0.00257873
LGG	HCK	3055	1	0.00253716
LGG	DES	1674	1	0.00252459
LGG	CMTM3	123920	1	0.00250028
LGG	GFAP	2670	1	0.00245595
LGG	TNFRSF25	8718	1	0.0024552
LGG	CD14	929	1	0.00245401
LGG	KLRC2	3822	1	0.00244162
LGG	GPR17	2840	1	0.00243066
LGG	B2M	567	1	0.00242018
LGG	C3	718	1	0.00240266
LGG	VIPR1	7433	1	0.00239185
LGG	VIP	7432	1	0.00237688
LGG	CD74	972	1	0.00237487
LGG	EDNRB	1910	1	0.00236534
LGG	FCER1G	2207	1	0.0023615
LGG	CCL2	6347	1	0.00235209
LGG	FGF17	8822	1	0.00235097
LGG	LIFR	3977	1	0.00234536
LGG	KLRC3	3823	1	0.00234097
LGG	PDGFRA	5156	1	0.00233859
LGG	CSF1R	1436	1	0.00233618
LGG	PGF	5228	1	0.00233504
LGG	SERPINA3	12	1	0.00233374
LGG	BMP2	650	1	0.00233296
LGG	AGT	183	1	0.00232209
LGG	CYBB	1536	1	0.00231925
LGG	SPP1	6696	1	0.00231798
LGG	FCGRT	2217	1	0.002316
LGG	F2R	2149	1	0.0023144
LGG	HMOX1	3162	1	0.00231101
LGG	TNC	3371	1	0.00231098
LGG	MASP1	5648	1	0.00230595
LGG	TNFRSF21	27242	1	0.00230547
LGG	GRB2	2885	0	0.00230237
LGG	TYROBP	7305	1	0.0022969
LGG	CHGA	1113	1	0.00228704
LGG	CXCL16	58191	1	0.00228606
LGG	CCK	885	1	0.00228297
LGG	PRLHR	2834	1	0.00227416
LGG	VCAM1	7412	1	0.00227132
LGG	EBI3	10148	1	0.00226969
LGG	TNFRSF19	55504	1	0.00226846
LGG	FCGR3A	2214	1	0.00226572
LGG	CCL3	6348	1	0.00226563
LGG	PTAFR	5724	1	0.00226547
LGG	CSF1	1435	1	0.00226442
LGG	IL18	3606	1	0.00226435
LGG	CALCRL	10203	1	0.00225884
LGG	CTSS	1520	1	0.00225303
LGG	VIPR2	7434	1	0.00224804
LGG	CCL4	6351	1	0.00224783
LGG	IL17RD	54756	1	0.00223909
LGG	OLR1	4973	1	0.0022343
LGG	ADCYAP1R1	117	1	0.00223367
LGG	CXCL14	9547	1	0.00223015
LGG	CCL4L2	9560	1	0.00222888
LGG	MSTN	2660	1	0.00222712
LGG	NMB	4828	1	0.00222514
LGG	C3AR1	719	1	0.0022225
LGG	CCL3L3	414062	1	0.00222191
LGG	CX3CR1	1524	1	0.00221379
LGG	WDR83	84292	0	0.0021643
LGG	CCDC114	93233	0	0.00211559
LGG	TRAF6	7189	0	0.00209119
LGG	YWHAG	7532	0	0.00200946
LGG	RPL11	6135	0	0.00183185
LGG	FYN	2534	0	0.00164327
LGG	IKBKE	9641	0	0.00153188
LGG	CSNK2B	1460	0	0.00138613
LGG	DDX46	9879	0	0.00135674
LGG	YWHAZ	7534	0	0.00134733
LGG	CBL	867	0	0.00133129
LGG	PRPF18	8559	0	0.00131468
LGG	PPP2R2B	5521	0	0.00129144
LGG	PTPN6	5777	0	0.00126204
LGG	SRC	6714	0	0.00125076
LGG	SF3B4	10262	0	0.00124477
LGG	EIF4A3	9775	0	0.0012207
LGG	CDK2	1017	0	0.00119021
LGG	MAPK3	5595	0	0.00118336
LGG	ARRB2	409	0	0.00118326
LGG	HNRNPK	3190	0	0.00117352
LGG	NPM1	4869	0	0.00115153
LGG	KIT	3815	0	0.00114856
LGG	HSPA8	3312	0	0.00114661
LGG	LSM7	51690	0	0.00113314
LGG	TP53	7157	0	0.00112462
LGG	IQGAP2	10788	0	0.00110145
LGG	PRKACB	5567	0	0.00109662
LGG	APC	324	0	0.0010867
LGG	U2AF2	11338	0	0.00108182
LGG	U2AF1	7307	0	0.00107857
LGG	PRKACA	5566	0	0.00107429
LGG	PABPC1	26986	0	0.00106802
LGG	SF3B1	23451	0	0.00106435
LGG	RPLP0	6175	0	0.00106025
LGG	NTRK2	4915	0	0.00105742
LGG	GNA11	2767	0	0.00104922
LGG	SNRPA	6626	0	0.00104911
LGG	HS3ST2	9956	0	0.00102666
LGG	JUN	3725	0	0.00102564
LGG	YBX1	4904	0	0.00102317
LGG	SF3B3	23450	0	0.00100052
LGG	DDX3X	1654	0	0.00100048
LGG	EEF1A1	1915	0	0.00100005
LGG	PSMA1	5682	0	0.000999782
LGG	VIM	7431	0	0.000995853
LGG	HSPA1A	3303	0	0.000995321
LGG	UBE2I	7329	0	0.000985086
LGG	SYNCRIP	10492	0	0.000983143
LGG	UBC	7316	0	0.000970686
LGG	MYC	4609	0	0.000970219
LGG	SP1	6667	0	0.000968302
LGG	ABL1	25	0	0.000941977
LGG	PRKCZ	5590	0	0.000935485
LGG	KRTAP10-7	386675	0	0.000932641
LGG	SLC25A5	292	0	0.000931417
LGG	DHX9	1660	0	0.000930047
LGG	IKBKG	8517	0	0.000925093
LGG	MDFI	4188	0	0.000907102
LGG	SLU7	10569	0	0.000906933
LGG	RPL15	6138	0	0.000905569
LGG	ACTB	60	0	0.000892178
LGG	RPL21	6144	0	0.000890984
LGG	TRAF1	7185	0	0.000890897
LIHC	TNFSF14	8740	1	0.00830479
LIHC	DEFA1	1667	1	0.00816718
LIHC	CALCA	796	1	0.00810661
LIHC	OXT	5020	1	0.00804556
LIHC	CD74	972	1	0.00797792
LIHC	VIPR1	7433	1	0.00793916
LIHC	MDK	4192	1	0.00787768
LIHC	PTH1R	5745	1	0.0078771
LIHC	NGFR	4804	1	0.00781729
LIHC	OSGIN1	29948	1	0.00779016
LIHC	IGF2	3481	1	0.00777451
LIHC	CXCL12	6387	1	0.00775194
LIHC	SPP1	6696	1	0.00772361
LIHC	HGF	3082	1	0.00768569
LIHC	CXCL10	3627	1	0.00767838
LIHC	IL1RL1	9173	1	0.00762635
LIHC	CXCL14	9547	1	0.00757153
LIHC	MARCO	8685	1	0.00756849
LIHC	HAMP	57817	1	0.00756018
LIHC	FCN2	2220	1	0.0075411
LIHC	LRRC59	55379	0	0.0069386
LIHC	MRPS26	64949	0	0.00363063
LIHC	PTPN6	5777	0	0.0036183
LIHC	PXN	5829	0	0.00356616
LIHC	KIT	3815	0	0.00345111
LIHC	RPL7	6129	0	0.00291291
LIHC	RPS16	6217	0	0.00264662
LIHC	GRB2	2885	0	0.00246277
LIHC	H1-3	3007	0	0.00242535
LIHC	GOLGA2	2801	0	0.00190952
LIHC	SF3B2	10992	0	0.00184664
LIHC	CREBBP	1387	0	0.00181096
LIHC	ACTB	60	0	0.00176168
LIHC	RAN	5901	0	0.00168467
LIHC	VIM	7431	0	0.00161262
LIHC	DDX39B	7919	0	0.00157239
LIHC	JUN	3725	0	0.00155912
LIHC	ZBTB8A	653121	0	0.00145609
LIHC	RPL30	6156	0	0.00143866
LIHC	SF3B3	23450	0	0.00140046
LIHC	TUBA1A	7846	0	0.00137874
LIHC	PRKACA	5566	0	0.00135202
LIHC	U2AF2	11338	0	0.00135114
LIHC	CACTIN	58509	0	0.00134321
LIHC	CALM2	805	0	0.00130124
LIHC	EDN1	1906	0	0.00129485
LIHC	SRC	6714	0	0.00127649
LIHC	YWHAZ	7534	0	0.00127573
LIHC	ATXN1	6310	0	0.001266
LIHC	SP1	6667	0	0.00125633
LIHC	ITGB1	3688	0	0.0012502
LIHC	MDM2	4193	0	0.00124539
LIHC	NA	440552	0	0.00123826
LIHC	DGKA	1606	0	0.0012082
LIHC	SRSF6	6431	0	0.0012019
LIHC	HSPA1A	3303	0	0.00120094
LIHC	DDX47	51202	0	0.00120054
LIHC	MYO1A	4640	0	0.00119013
LIHC	RPS13	6207	0	0.00118667
LIHC	RPL6	6128	0	0.00117957
LIHC	POC5	134359	0	0.00117613
LIHC	SGCG	6445	0	0.00117367
LIHC	DEXI	28955	0	0.00116698
LIHC	NFKB2	4791	0	0.00116438
LIHC	PSMA6	5687	0	0.00115796
LIHC	YWHAG	7532	0	0.00115733
LIHC	TFIP11	24144	0	0.00114045
LIHC	UBC	7316	0	0.0011142
LIHC	RPL4	6124	0	0.00109685
LIHC	TRAF6	7189	0	0.00109392
LIHC	EIF4A3	9775	0	0.00108123
LIHC	CALM1	801	0	0.00107366
LIHC	TP53	7157	0	0.00107272
LIHC	RPL29	6159	0	0.00107189
LIHC	GSK3B	2932	0	0.00106399
LIHC	CDK1	983	0	0.00105915
LIHC	MAPK6	5597	0	0.00105898
LIHC	RPL24	6152	0	0.00105731
LIHC	AKT2	208	0	0.00104098
LIHC	EEF1A1	1915	0	0.0010375
LIHC	DHX9	1660	0	0.00100249
LIHC	CRKL	1399	0	0.00100124
LIHC	HSPA8	3312	0	0.00100108
LIHC	ABL1	25	0	0.000989208
LIHC	OSM	5008	0	0.000988501
LIHC	RPS14	6208	0	0.00097772
LIHC	RBM8A	9939	0	0.000976471
LIHC	CPSF6	11052	0	0.00097286
LIHC	CDC27	996	0	0.000970688
LIHC	MYC	4609	0	0.000961971
LIHC	MAD2L1	4085	0	0.000959271
LIHC	KRTAP10-9	386676	0	0.000923309
LIHC	TUBA3C	7278	0	0.000921635
LIHC	FOS	2353	0	0.000921015
LIHC	IKBKE	9641	0	0.000916343
LIHC	DDX23	9416	0	0.000913698
LIHC	SPARC	6678	0	0.000911211
LIHC	EGFR	1956	0	0.000906599
LIHC	MMP14	4323	0	0.000901322
LIHC	SNRPD2	6633	0	0.000899435
LIHC	RPL11	6135	0	0.000896158
LIHC	QRICH1	54870	0	0.000896101
LIHC	SDCBP	6386	0	0.000893719
LIHC	FYN	2534	0	0.00089347
LIHC	SRSF5	6430	0	0.000890567
LIHC	CDK2	1017	0	0.00089001
LIHC	MAP3K12	7786	0	0.000883212
LIHC	SF3B1	23451	0	0.000879546
LIHC	NR1H4	9971	0	0.000875988
LIHC	RPL13	6137	0	0.00086733
LIHC	RPS11	6205	0	0.000865048
LIHC	CD44	960	0	0.000853347
LIHC	LSM2	57819	0	0.000848843
LIHC	WBP11	51729	0	0.000847746
LIHC	HSP90AB1	3326	0	0.000847088
LIHC	YWHAE	7531	0	0.000846277
LIHC	RPL23	9349	0	0.000838155
LIHC	TCP1	6950	0	0.000828878
LIHC	RPS8	6202	0	0.000820628
LIHC	PABPC1	26986	0	0.000819898
LIHC	U2SURP	23350	0	0.000812444
LIHC	IKBKG	8517	0	0.000804273
LIHC	RPL35A	6165	0	0.000799357
LIHC	CRK	1398	0	0.000798471
LIHC	NPM1	4869	0	0.000794387
LIHC	CDC5L	988	0	0.000792851
LIHC	BUD13	84811	0	0.000790705
LIHC	TRIM44	54765	0	0.00078946
LIHC	IRF7	3665	0	0.000787611
LIHC	CSNK2A1	1457	0	0.000786749
LIHC	HNRNPU	3192	0	0.000786022
LIHC	ATP1B3	483	0	0.000784341
LIHC	HDAC1	3065	0	0.000780564
LIHC	ARRB2	409	0	0.000776592
LUAD	GRB2	2885	0	0.00334916
LUAD	SEMA3B	7869	1	0.00270689
LUAD	FPR1	2357	1	0.00264704
LUAD	ACTA1	58	1	0.00261987
LUAD	CDH1	999	1	0.00254538
LUAD	NR4A1	3164	1	0.00251876
LUAD	MAP3K8	1326	1	0.00245483
LUAD	AGER	177	1	0.00244412
LUAD	GPR17	2840	1	0.00243071
LUAD	DES	1674	1	0.00241296
LUAD	DEFA1	1667	1	0.00241115
LUAD	PPBP	5473	1	0.00240757
LUAD	MDK	4192	1	0.0023941
LUAD	CXCL13	10563	1	0.00237903
LUAD	VIPR1	7433	1	0.00237623
LUAD	TGFBR3	7049	1	0.00236362
LUAD	EDNRB	1910	1	0.00236208
LUAD	TRIR	79002	0	0.00235091
LUAD	CBLC	23624	1	0.00234918
LUAD	NPR1	4881	1	0.00234665
LUAD	PTX3	5806	1	0.00234032
LUAD	FGR	2268	1	0.0023397
LUAD	CD79A	973	1	0.00233961
LUAD	TEK	7010	1	0.00233886
LUAD	PIK3R5	23533	1	0.00233767
LUAD	PF4	5196	1	0.00233719
LUAD	ANGPTL1	9068	1	0.002337
LUAD	PTH1R	5745	1	0.00233631
LUAD	PDGFRA	5156	1	0.00233365
LUAD	FGFR4	2264	1	0.00233287
LUAD	SDC1	6382	1	0.00232851
LUAD	SERPINA3	12	1	0.00232479
LUAD	AGTR1	185	1	0.0023229
LUAD	OGN	4969	1	0.00231962
LUAD	ROBO3	64221	1	0.0023168
LUAD	DDX41	51428	0	0.00231603
LUAD	TIE1	7075	1	0.0023126
LUAD	FPR2	2358	1	0.00231191
LUAD	SPP1	6696	1	0.00231121
LUAD	ADM	133	1	0.00230917
LUAD	ACVRL1	94	1	0.00230863
LUAD	CHIT1	1118	1	0.00230848
LUAD	SLIT2	9353	1	0.00230766
LUAD	CSF3R	1441	1	0.0023076
LUAD	ELN	2006	1	0.00230609
LUAD	PLA2G2A	5320	1	0.00229502
LUAD	CXCL9	4283	1	0.00229209
LUAD	GREM1	26585	1	0.00228851
LUAD	FLT4	2324	1	0.00228795
LUAD	ADRB1	153	1	0.00228324
LUAD	AZU1	566	1	0.00228257
LUAD	SEMA6A	57556	1	0.00228157
LUAD	PRTN3	5657	1	0.00228152
LUAD	FGF7	2252	1	0.00228152
LUAD	ACKR1	2532	1	0.00228043
LUAD	CXCR1	3577	1	0.00227612
LUAD	IL18R1	8809	1	0.00227003
LUAD	S1PR1	1901	1	0.00226456
LUAD	RETN	56729	1	0.00226255
LUAD	CSF3	1440	1	0.00225666
LUAD	CALCRL	10203	1	0.00225528
LUAD	IL1RL1	9173	1	0.00225463
LUAD	IL1R2	7850	1	0.00225074
LUAD	FCGR3B	2215	1	0.00224921
LUAD	GDF10	2662	1	0.00224289
LUAD	DEFA3	1668	1	0.00223376
LUAD	LTBP4	8425	1	0.00223139
LUAD	IL18RAP	8807	1	0.00223051
LUAD	CXCL14	9547	1	0.00222984
LUAD	CMTM2	146225	1	0.00222137
LUAD	CCL23	6368	1	0.00221796
LUAD	CCDC114	93233	0	0.00211599
LUAD	ATXN1L	342371	0	0.00208987
LUAD	NEU4	129807	0	0.00204139
LUAD	RPL23	9349	0	0.00174776
LUAD	UBQLN4	56893	0	0.00166482
LUAD	YWHAG	7532	0	0.0014785
LUAD	ATXN1	6310	0	0.00146739
LUAD	SP1	6667	0	0.0014167
LUAD	SF3B3	23450	0	0.00137735
LUAD	MAP3K7	6885	0	0.00130366
LUAD	SF3B2	10992	0	0.00128499
LUAD	YWHAZ	7534	0	0.00126632
LUAD	PTPN6	5777	0	0.00124915
LUAD	PRKACA	5566	0	0.00123917
LUAD	RELA	5970	0	0.00123839
LUAD	SRC	6714	0	0.00121416
LUAD	MED15	51586	0	0.00119356
LUAD	DHX9	1660	0	0.00117069
LUAD	TP53	7157	0	0.00116052
LUAD	ACTB	60	0	0.0011354
LUAD	KIT	3815	0	0.00113155
LUAD	SH3GL3	6457	0	0.00112692
LUAD	EFEMP2	30008	0	0.00110912
LUAD	EGFR	1956	0	0.00109203
LUAD	MAPK3	5595	0	0.00109107
LUAD	CALM1	801	0	0.00109002
LUAD	PRSS23	11098	0	0.0010738
LUAD	STK39	27347	0	0.00106195
LUAD	TRAF6	7189	0	0.00105443
LUAD	CREBBP	1387	0	0.00104223
LUAD	GOLGA2	2801	0	0.00103447
LUAD	CDK2	1017	0	0.00103138
LUAD	EBF1	1879	0	0.00102297
LUAD	ANKRD11	29123	0	0.00101745
LUAD	EEF1A1	1915	0	0.00100757
LUAD	MYC	4609	0	0.00100538
LUAD	RPL15	6138	0	0.00100221
LUAD	RPS8	6202	0	0.00100019
LUAD	RPS6	6194	0	0.00098829
LUAD	IKBKE	9641	0	0.000986505
LUAD	RPL26	6154	0	0.000986494
LUAD	SNRPD2	6633	0	0.000982293
LUAD	PABPC1	26986	0	0.000981302
LUAD	SHC1	6464	0	0.000974788
LUAD	ABL1	25	0	0.000974093
LUAD	ARRB2	409	0	0.000958388
LUAD	IKBKG	8517	0	0.000956554
LUAD	HSPA8	3312	0	0.000950929
LUAD	UBC	7316	0	0.00093911
LUAD	SF3B1	23451	0	0.000918441
LUAD	NCL	4691	0	0.000910836
LUAD	RPL37A	6168	0	0.000908654
LUAD	PIK3R1	5295	0	0.000893449
LUAD	RPL6	6128	0	0.000891603
LUAD	U2AF1	7307	0	0.000887093
LUAD	TFIP11	24144	0	0.000886299
LUAD	DDX5	1655	0	0.000883544
LUAD	SNRNP200	23020	0	0.000872242
LUAD	RPS13	6207	0	0.000871058
LUAD	RPLP0	6175	0	0.000870188
LUAD	HLA-B	3106	0	0.000865718
LUAD	HDAC1	3065	0	0.000859678
LUAD	SRSF11	9295	0	0.00085376
LUSC	GRB2	2885	0	0.00330627
LUSC	ARRB1	408	1	0.00283958
LUSC	SEMA3B	7869	1	0.00239256
LUSC	ACTA1	58	1	0.00235851
LUSC	NR2F1	7025	1	0.00235716
LUSC	FPR1	2357	1	0.00233859
LUSC	CXCL2	2920	1	0.00227588
LUSC	NR4A1	3164	1	0.00225652
LUSC	BMP7	655	1	0.00224955
LUSC	BTK	695	1	0.00223873
LUSC	PTGDS	5730	1	0.002228
LUSC	EPOR	2057	1	0.00221742
LUSC	TNFRSF14	8764	1	0.00221495
LUSC	MAP3K8	1326	1	0.00218852
LUSC	BIRC5	332	1	0.00218669
LUSC	AGER	177	1	0.00216257
LUSC	GPR17	2840	1	0.00215418
LUSC	TGFBR2	7048	1	0.00214549
LUSC	DES	1674	1	0.00214126
LUSC	PPBP	5473	1	0.00213213
LUSC	DEFA1	1667	1	0.00213106
LUSC	KDR	3791	1	0.00213099
LUSC	TIE1	7075	1	0.00212178
LUSC	PDGFRA	5156	1	0.00212002
LUSC	NPR1	4881	1	0.00211782
LUSC	CXCL13	10563	1	0.0021039
LUSC	DDX41	51428	0	0.00210342
LUSC	VIPR1	7433	1	0.00210127
LUSC	NTS	4922	1	0.00209514
LUSC	TGFBR3	7049	1	0.00209264
LUSC	EDNRB	1910	1	0.00209013
LUSC	MDK	4192	1	0.00208546
LUSC	CBLC	23624	1	0.00208047
LUSC	FGR	2268	1	0.00207848
LUSC	PTHLH	5744	1	0.00207578
LUSC	TEK	7010	1	0.00207394
LUSC	SCGB3A1	92304	1	0.00207308
LUSC	PTX3	5806	1	0.00206824
LUSC	PTH1R	5745	1	0.00206668
LUSC	PIK3R5	23533	1	0.00206666
LUSC	PF4	5196	1	0.00206647
LUSC	FGFR4	2264	1	0.0020658
LUSC	ANGPTL1	9068	1	0.00206466
LUSC	SHC2	25759	1	0.00206286
LUSC	SDC1	6382	1	0.00206268
LUSC	AGTR1	185	1	0.00205815
LUSC	SPP1	6696	1	0.00205054
LUSC	CSF3R	1441	1	0.00205045
LUSC	OGN	4969	1	0.00204994
LUSC	ACVRL1	94	1	0.002042
LUSC	ELN	2006	1	0.0020404
LUSC	SLIT2	9353	1	0.00204003
LUSC	PLA2G2A	5320	1	0.00203384
LUSC	HGF	3082	1	0.00203218
LUSC	ENG	2022	1	0.00202839
LUSC	ICAM2	3384	1	0.00202657
LUSC	FLT4	2324	1	0.00202442
LUSC	ADRB1	153	1	0.00202169
LUSC	GREM1	26585	1	0.00202118
LUSC	FGF7	2252	1	0.00201748
LUSC	ACKR1	2532	1	0.00201699
LUSC	AZU1	566	1	0.00201624
LUSC	CXCR1	3577	1	0.00201394
LUSC	IL18R1	8809	1	0.00200603
LUSC	S1PR1	1901	1	0.00200251
LUSC	RETN	56729	1	0.00200231
LUSC	CCL14	6358	1	0.00199726
LUSC	IL7R	3575	1	0.00199519
LUSC	CSF3	1440	1	0.00199344
LUSC	IL1RL1	9173	1	0.00199321
LUSC	GDF10	2662	1	0.00198079
LUSC	OLR1	4973	1	0.00197406
LUSC	DEFA3	1668	1	0.00197351
LUSC	ANGPT1	284	1	0.00197077
LUSC	IL18RAP	8807	1	0.00197037
LUSC	CXCL14	9547	1	0.00197022
LUSC	MARCO	8685	1	0.00196926
LUSC	PGC	5225	1	0.00196209
LUSC	CCL23	6368	1	0.00195902
LUSC	CCDC114	93233	0	0.00193999
LUSC	GIT2	9815	0	0.00191219
LUSC	ATXN1L	342371	0	0.00184868
LUSC	NEU4	129807	0	0.00180682
LUSC	RPL23	9349	0	0.00163247
LUSC	YWHAG	7532	0	0.00157273
LUSC	IKBKE	9641	0	0.00151725
LUSC	UBQLN4	56893	0	0.00151437
LUSC	SART3	9733	0	0.00136198
LUSC	SF3B2	10992	0	0.00132492
LUSC	YWHAZ	7534	0	0.00126503
LUSC	SF3B3	23450	0	0.00124346
LUSC	RPLP0	6175	0	0.00123286
LUSC	RPN1	6184	0	0.00120166
LUSC	PTPN6	5777	0	0.00119828
LUSC	EGFR	1956	0	0.0011902
LUSC	PRKACA	5566	0	0.00118194
LUSC	MAP3K7	6885	0	0.00117925
LUSC	PXN	5829	0	0.00117221
LUSC	CDK2	1017	0	0.00117213
LUSC	U2AF1	7307	0	0.00117102
LUSC	MYC	4609	0	0.00116709
LUSC	TP53	7157	0	0.00116137
LUSC	ARRB2	409	0	0.00114212
LUSC	DHX9	1660	0	0.00113786
LUSC	SRC	6714	0	0.00110981
LUSC	EP300	2033	0	0.00109589
LUSC	MED15	51586	0	0.00109213
LUSC	ACTB	60	0	0.00108758
LUSC	MRPS26	64949	0	0.00107233
LUSC	RPS27A	6233	0	0.00106191
LUSC	HSP90AB1	3326	0	0.00104136
LUSC	TRAF6	7189	0	0.00102324
LUSC	KIT	3815	0	0.00101917
LUSC	EEF1A1	1915	0	0.00101508
LUSC	CREBBP	1387	0	0.00101125
LUSC	JUN	3725	0	0.00100664
LUSC	GOLGA2	2801	0	0.000999665
LUSC	EFEMP2	30008	0	0.000997283
LUSC	SP1	6667	0	0.000974079
LUSC	PSMA1	5682	0	0.000968614
LUSC	RPL26	6154	0	0.000948453
LUSC	STK39	27347	0	0.000942537
LUSC	UBC	7316	0	0.000941062
LUSC	SF3B1	23451	0	0.000940204
LUSC	IKBKG	8517	0	0.000934557
LUSC	SNRPD2	6633	0	0.000934282
LUSC	ABL1	25	0	0.000931549
LUSC	RTN4	57142	0	0.000913293
LUSC	RPL15	6138	0	0.000912923
LUSC	EBF1	1879	0	0.000907177
LUSC	RPS8	6202	0	0.000905843
LUSC	CSNK2A1	1457	0	0.000903004
LUSC	HSPA8	3312	0	0.000900156
LUSC	EIF4A3	9775	0	0.00089948
OV	RPS6	6194	0	0.00424189
OV	VIM	7431	1	0.0042121
OV	ISG15	9636	1	0.00396623
OV	PTGDS	5730	1	0.00370409
OV	CDH1	999	1	0.00369052
OV	NR4A1	3164	1	0.00364306
OV	PDGFRB	5159	1	0.00360035
OV	AKT3	10000	1	0.00359571
OV	DES	1674	1	0.00355619
OV	NR2F1	7025	1	0.00354283
OV	PGR	5241	1	0.00353133
OV	LEFTY2	7044	1	0.00349652
OV	NR2F6	2063	1	0.00349375
OV	INHA	3623	1	0.00347997
OV	TGFBR3	7049	1	0.00347848
OV	CXCR4	7852	1	0.00347485
OV	NR2F2	7026	1	0.00347004
OV	NR5A1	2516	1	0.00346026
OV	ANGPTL1	9068	1	0.00345612
OV	NGF	4803	1	0.0034525
OV	NR4A2	4929	1	0.00344752
OV	SHC2	25759	1	0.00344036
OV	MMP9	4318	1	0.00343663
OV	SDC1	6382	1	0.00342746
OV	OGN	4969	1	0.00342725
OV	CBLC	23624	1	0.00342702
OV	IGF2	3481	1	0.00342458
OV	ROBO3	64221	1	0.00342226
OV	PDGFRA	5156	1	0.00341754
OV	SERPINA3	12	1	0.00341603
OV	NFATC4	4776	1	0.00340511
OV	PTH2R	5746	1	0.00339574
OV	SPP1	6696	1	0.00339205
OV	BMP7	655	1	0.00338829
OV	PLA2G2A	5320	1	0.00338481
OV	BIRC5	332	1	0.00338242
OV	CCL26	10344	1	0.00338071
OV	SST	6750	1	0.00336945
OV	FGF7	2252	1	0.00336047
OV	CCL28	56477	1	0.00335117
OV	TNFRSF12A	51330	1	0.00334757
OV	CXCL10	3627	1	0.00334596
OV	FGF18	8817	1	0.00334337
OV	CLDN4	1364	1	0.00333892
OV	AMHR2	269	1	0.00333119
OV	PNOC	5368	1	0.00328177
OV	PDGFD	80310	1	0.00327468
OV	THOC5	8563	0	0.00324529
OV	GRB2	2885	0	0.00249609
OV	DDX20	11218	0	0.00180063
OV	RPL37A	6168	0	0.00161574
OV	CEP250	11190	0	0.00150875
OV	RPL11	6135	0	0.00147388
OV	SRSF11	9295	0	0.00145589
OV	CDK2	1017	0	0.0014344
OV	SF3B3	23450	0	0.00140632
OV	YWHAZ	7534	0	0.00136739
OV	RPL4	6124	0	0.00130693
OV	HDAC1	3065	0	0.00130317
OV	MYC	4609	0	0.00129793
OV	RBM8A	9939	0	0.0012508
OV	SNRPA	6626	0	0.00122979
OV	TP53	7157	0	0.00120623
OV	GTF3C4	9329	0	0.00119033
OV	NCBP1	4686	0	0.00118777
OV	NCL	4691	0	0.00117955
OV	EGFR	1956	0	0.00117169
OV	HSPA8	3312	0	0.00114246
OV	CRNKL1	51340	0	0.00114191
OV	SRC	6714	0	0.00111868
OV	RPS8	6202	0	0.00111577
OV	SNRNP35	11066	0	0.00109476
OV	YWHAG	7532	0	0.00108874
OV	THOC7	80145	0	0.00108792
OV	PABPC1	26986	0	0.00106191
OV	TRAF6	7189	0	0.00104023
OV	GADD45B	4616	0	0.0010386
OV	KRT40	125115	0	0.0010238
OV	EEF1A1	1915	0	0.00102011
OV	IKBKE	9641	0	0.00101946
OV	DHX9	1660	0	0.00101832
OV	C5	727	0	0.00101525
OV	TAF7	6879	0	0.00100356
OV	HSP90AB1	3326	0	0.000990622
OV	ARRB2	409	0	0.000986448
OV	SF3B1	23451	0	0.000977427
OV	SNRNP200	23020	0	0.000966321
OV	U2AF2	11338	0	0.000959051
OV	U2SURP	23350	0	0.000958607
OV	SF3B2	10992	0	0.000957352
OV	RPLP0	6175	0	0.000955792
OV	RPL31	6160	0	0.000955373
OV	RPL13A	23521	0	0.000955149
OV	PLCG1	5335	0	0.00095167
OV	IKBKG	8517	0	0.000948159
OV	ARRB1	408	0	0.000937135
OV	MAPK13	5603	0	0.000935707
OV	UBC	7316	0	0.000934726
OV	PRKACA	5566	0	0.000930505
OV	APC	324	0	0.000926855
OV	SRSF1	6426	0	0.000898492
OV	PPP2R1A	5518	0	0.000886195
OV	GSK3B	2932	0	0.000882524
OV	RPL7	6129	0	0.000873001
OV	KRTAP10-3	386682	0	0.000863001
OV	MAPK1	5594	0	0.000854053
OV	ATXN1L	342371	0	0.000848588
OV	PHB	5245	0	0.000841206
OV	ATXN1	6310	0	0.000834293
OV	TFIP11	24144	0	0.000831166
OV	TRIM27	5987	0	0.000826316
OV	SP1	6667	0	0.000825343
OV	CREB3	10488	0	0.000823161
OV	RPL23	9349	0	0.00082171
OV	RPL26	6154	0	0.000817904
OV	FYN	2534	0	0.000815705
OV	ESR1	2099	0	0.00081148
OV	NPM1	4869	0	0.000810259
OV	MOV10	4343	0	0.000809446
OV	HNRNPU	3192	0	0.000800765
OV	DHX8	1659	0	0.000799418
OV	CSNK2A1	1457	0	0.000797988
[truncated: 1,352 more rows]

## Sheet: Table S7
Table S7. Drug prediction of top 1% genes in pan-cancer
Symbol	Entrez ID	Rank	Drug	Sources	PMIDs
ABL1	25	0.00401189	BLITUMOMAB	PharmGKB|FDA
			MELPHALAN	NCI	7923130
			OXALIPLATIN	NCI	10098743
			HYDROXYUREA	NCI	7923130
			PAZOPANIB	DTC
			IMATINIB	DTC|MyCancerGenome|TdgClinicalTrial|JAX-CKB|NCI|TEND|COSMIC|CIViC|PharmGKB|FDA|OncoKB
			NILOTINIB	MyCancerGenome|TdgClinicalTrial|JAX-CKB|TEND|DoCM|COSMIC|CIViC|PharmGKB|FDA|OncoKB
			SORAFENIB	DTC
			BOSUTINIB	MyCancerGenome|TdgClinicalTrial|ChemblInteractions|DoCM|COSMIC|PharmGKB|TTD|FDA|OncoKB
			BUSULFAN	PharmGKB|FDA
			POTINIB	DTC|MyCancerGenome|TdgClinicalTrial|DoCM|CIViC|PharmGKB|TTD|FDA|OncoKB
			DASATINIB	MyCancerGenome|TdgClinicalTrial|JAX-CKB|ChemblInteractions|TEND|DoCM|COSMIC|CIViC|PharmGKB|FDA|OncoKB
			AZACITIDINE	NCI	2425967
			VINCRISTINE	PharmGKB|FDA
ACTB	60	0.00237741	CYCLOPHOSPHAMIDE	NCI	12167460
AKT1	207	0.00906389	TEMSIROLIMUS	JAX-CKB	27016228
			SIROLIMUS	JAX-CKB	18708578
			IRINOTECAN	JAX-CKB	25714871
			SORAFENIB	JAX-CKB
			EVEROLIMUS	JAX-CKB|MyCancerGenomeClinicalTrial
			GEMCITABINE	JAX-CKB
			TOPOTECAN	DTC	21440338
			PACLITAXEL	JAX-CKB
			DOXORUBICIN	JAX-CKB	18708578
			WORTMANNIN	NCI	10187855
			CARBOPLATIN	PharmGKB	22901187
			CISPLATIN	JAX-CKB|PharmGKB	22901187|25519148
APC	324	0.00928678	SIROLIMUS	JAX-CKB	18768809|20080688
			VINORELBINE	JAX-CKB	22399804
			DASATINIB	JAX-CKB	20473900
			FLUOROURACIL	JAX-CKB	27626067
			TRASTUZUMAB	JAX-CKB	27626067
AR	367	0.00958395	BORTEZOMIB	DTC
			AMCINONIDE	DTC
			AZACITIDINE	DTC
			BETAMETHASONE	DTC
			MITOMYCIN	DTC
			METHYLPREDNISOLONE	DTC
			CARBAMAZEPINE	DTC
			PACLITAXEL	DTC
			MELPHALAN	DTC
			ALDOSTERONE	DTC
			THIOGUANINE	DTC
			THIOTEPA	DTC
			TRIAMCINOLONE	DTC
			TRILOSTANE	DTC
			VINCRISTINE	DTC
			ESTRAMUSTINE	DTC
			CARFILZOMIB	DTC
			CICLESONIDE	DTC
			CLOFARABINE	DTC
			COLCHICINE	DTC
			DACTINOMYCIN	DTC
			DASATINIB	DTC
			DAUNORUBICIN	DTC
			DEFLAZACORT	DTC
			DESONIDE	DTC
			DESOXIMETASONE	DTC
			DEXAMETHASONE	DTC
			DIFLUPREDTE	DTC
			FLUMETHASONE	DTC
			EVEROLIMUS	DTC
			FLUCYTOSINE	DTC
			FLUDROCORTISONE	DTC|TTD	11956172|11906285
			FLURANDRENOLIDE	DTC
			FLUNISOLIDE	DTC
			FLUOCINONIDE	DTC
			FLUOROMETHOLONE	DTC
			PAZOPANIB	DTC
			HALCINONIDE	DTC
			HYDROCORTISONE	DTC
			MEDRYSONE	DTC
			SIROLIMUS	DTC
			PREDNICARBATE	DTC
			PREDNISOLONE	DTC
			PREDNISONE	DTC
			TACROLIMUS	DTC
BRCA1	672	0.00720654	OXALIPLATIN	ClearityFoundationBiomarkers|CIViC	25072261
			VINORELBINE	JAX-CKB|NCI	26801247|14559807
			OLAPARIB	ClearityFoundationBiomarkers|JAX-CKB|CIViC|PharmGKB|OncoKB	31157963|23346317|26546619|20609467|27454287|25193512|30345884|25366685|19553641|28792849|25218906|28578601|21862407|22172724|30797618|31538027|24882434
			IRINOTECAN	JAX-CKB	26842236
			DOXORUBICIN	NCI	12698198
			MITOXANTRONE	NCI	12684687
			BLEOMYCIN	NCI	14559807
			DENOSUMAB	JAX-CKB	27322743
			PACLITAXEL	JAX-CKB|NCI	12684687
			TEMOZOLOMIDE	JAX-CKB
			GEMCITABINE	NCI|CIViC	29338080|12684687
			CARBOPLATIN	ClearityFoundationBiomarkers|JAX-CKB|CIViC	25847936|25824335|21135055|27998224
			CYCLOPHOSPHAMIDE	JAX-CKB	25589624
			CISPLATIN	ClearityFoundationBiomarkers|JAX-CKB|NCI|CIViC	29338080|25847936|25193512|26801247|16982732|25072261|27454289
			CHLORAMBUCIL	JAX-CKB	25193512
			EVEROLIMUS	JAX-CKB	26546619
CDK2	1017	0.000445765	CARBOPLATIN	CIViC	26006067
			DEXAMETHASONE	NCI	10867026
			PACLITAXEL	NCI	16020661
			RALTITREXED	NCI	10047461
			ERIBULIN	CIViC	26006067
CREBBP	1387	0.00482912	COLCHICINE	DTC
CTNNB1	1499	0.00846954	TEMSIROLIMUS	JAX-CKB	27016228
			LELIDOMIDE	PharmGKB	26521987
			IMATINIB	JAX-CKB	26861905
			THALIDOMIDE	PharmGKB	26521987
			DEXAMETHASONE	PharmGKB	26521987
			CYCLOPHOSPHAMIDE	PharmGKB	26521987
EGFR	1956	0.000965825	TRASTUZUMAB	TEND	11752352
			PEMETREXED	CIViC	31605797|24636847
			TEMSIROLIMUS	JAX-CKB	24470557
			IMATINIB	JAX-CKB|PharmGKB	28762371|22323597
			BEVACIZUMAB	JAX-CKB	28408243
			POTINIB	JAX-CKB	22238366
			SIROLIMUS	JAX-CKB|DoCM|CIViC	24934779|24813888|25157968|18089823
			SORAFENIB	DTC|JAX-CKB|TTD	23629727|26743856|26318998|24166906
			BOSUTINIB	JAX-CKB	28416483
			TEMOZOLOMIDE	JAX-CKB	25910950|26846818
			ETOPOSIDE	JAX-CKB	27216155
			EVEROLIMUS	JAX-CKB	23629727
			FLUOROURACIL	PharmGKB	23816762
			GEMCITABINE	PharmGKB	21783417|22285168
			IBRUTINIB	DTC	24915291
			CISPLATIN	JAX-CKB|CIViC	23764753|27040853
			IRINOTECAN	JAX-CKB	23209031|25185971
			PACLITAXEL	JAX-CKB|CIViC|PharmGKB	24886365|22370314|20573926|19692680|22581822|21783417|22285168|21900837|22139083|20022809
			CARBOPLATIN	CIViC|PharmGKB	22370314|20573926|19692680|22581822|21783417|22285168|21900837|22139083|20022809
			DASATINIB	JAX-CKB	28416483
			SUNITINIB	JAX-CKB	27149458
			DOCETAXEL	PharmGKB	21783417|22285168
			DECITABINE	JAX-CKB	24874286
ESR1	2099	0.00349183	DOCETAXEL	PharmGKB|FDA
			TRASTUZUMAB	PharmGKB|FDA
			DACTINOMYCIN	DTC
			IXABEPILONE	PharmGKB|FDA
			PALBOCICLIB	CIViC|PharmGKB|FDA	25524798
			PHENYLALANINE	DTC
			ERIBULIN	PharmGKB|FDA
			LEFLUNOMIDE	PharmGKB	21174621
			CISPLATIN	PharmGKB	21430602
			OLAPARIB	PharmGKB|FDA
			EVEROLIMUS	PharmGKB|FDA
FOS	2353	0.00780089	PACLITAXEL	NCI	9588740
FYN	2534	0.00178306	PAZOPANIB	DTC
			DASATINIB	TdgClinicalTrial|ChemblInteractions|TEND|TTD	20072833|11752352|17139284|17016423
GNL3	26354	0.00980684	FLUOROURACIL	PharmGKB
			CYCLOPHOSPHAMIDE	PharmGKB
			EPIRUBICIN	PharmGKB
HDAC1	3065	0.00312036	PANOBINOSTAT	TALC|DTC|MyCancerGenome|TdgClinicalTrial|CancerCommons|TTD	24694055|17145876|17455259
			DAUNORUBICIN	DTC	22260166
			VORINOSTAT	TALC|DTC|MyCancerGenome|TdgClinicalTrial|ChemblInteractions|TEND|TTD	24694055|17694093|19344175|19966789|26211462|23622981|22260166|11752352|18381238|20491440|21548582|23672185|19084294
			BELINOSTAT	TALC|DTC|MyCancerGenome|TdgClinicalTrial|ChemblInteractions	25937017|28090369
HLA-B	3106	0.00468053	THALIDOMIDE	NCI	7876469
			CARBAMAZEPINE	NCI|FDA	16981842
			SULFASALAZINE	PharmGKB	25303297
			PAZOPANIB	PharmGKB|FDA	26546620
			METHIMAZOLE	PharmGKB	26599303|26151496
HSP90AA1	3320	0.00817236	WORTMANNIN	DTC
HSP90AB1	3326	0.00141159	BEVACIZUMAB	PharmGKB	29871907
HSPA8	3312	0.00148588	CISPLATIN	NCI	15378690
			DEXAMETHASONE	NCI	7542664
			TRETINOIN	NCI	8578578
JUN	3725	0.002526	COLCHICINE	DTC
			METHIMAZOLE	DTC
LCK	3932	0.00750371	IMATINIB	DTC
			DASATINIB	TdgClinicalTrial|ChemblInteractions|TEND|TTD	17154512|20072833|11752352
			PAZOPANIB	DTC
MAPK1	5594	0.00445765	MITOXANTRONE	DTC
			ETOPOSIDE	DTC	23999041
			SORAFENIB	PharmGKB	20124951
MAPK14	1432	0.00832095	DOXORUBICIN	NCI	16905201|15557793
			PIRFENIDONE	TdgClinicalTrial
			SORAFENIB	DTC|PharmGKB	20124951
			DASATINIB	DTC	18180381
MAPK3	5595	0.00839525	CYCLOPHOSPHAMIDE	NCI	15193230
			SORAFENIB	PharmGKB	20124951
			ETOPOSIDE	DTC	23999041
MAPK6	5597	0.00549777	SORAFENIB	PharmGKB	20124951
MYC	4609	0.000742942	IMATINIB	NCI	15517875
			CISPLATIN	CIViC	28490518
			INDOMETHACIN	NCI	10403534
			METHYLPREDNISOLONE	NCI	9169090
			OLAPARIB	CIViC	28490518
			IBRUTINIB	CIViC	28830912
			VORINOSTAT	NCI	15583844
			THIOGUANINE	NCI	1988936
			AZACITIDINE	NCI	9006118
NFKB1	4790	0.0089896	BORTEZOMIB	ClearityFoundationClinicalTrial
			CHLORAMBUCIL	DTC
			TRIAMCINOLONE	DTC
			HYDROCORTISONE	DTC
			MITOXANTRONE	DTC
			THALIDOMIDE	TdgClinicalTrial|TEND	11752352|15723633
NPM1	4869	0.00215453	VORINOSTAT	JAX-CKB	26634271
			TRETINOIN	CIViC	19965647|21719597
PIK3R1	5295	0.00579495	EVEROLIMUS	PharmGKB
PRKCA	5578	0.00156018	BEVACIZUMAB	PharmGKB	29871907
RELA	5970	0.00185736	DEXAMETHASONE	DTC	23219855
RPL13	6137	0.00453195	DOCETAXEL	PharmGKB	20038957
			THALIDOMIDE	PharmGKB	20038957
SMAD2	4087	0.00430906	BLEOMYCIN	NCI	17274978
			HYDROCORTISONE	NCI	16644034
			TRETINOIN	NCI	15799023
SMAD3	4088	0.00668648	MITOXANTRONE	DTC
			VINCRISTINE	DTC
			DEXAMETHASONE	NCI	15817834
			DASATINIB	DTC
			IMATINIB	DTC
			FLUDARABINE	DTC
			IBRUTINIB	DTC
			AZACITIDINE	DTC
SRC	6714	0.000594354	CISPLATIN	JAX-CKB	27196758
			DASATINIB	TALC|DTC|TdgClinicalTrial|JAX-CKB|ChemblInteractions|TEND|CancerCommons|TTD	27231123|17429625|16230377|19098899|19462975|17155893|27154914|27222538|25835317|11752352|17148760|16397263
			DOXORUBICIN	NCI	7532928
			PACLITAXEL	JAX-CKB	22784709
			POTINIB	TdgClinicalTrial|JAX-CKB	26270481|19878872
			BOSUTINIB	TALC|TdgClinicalTrial|JAX-CKB|ChemblInteractions|TTD	27196758
			GEMCITABINE	JAX-CKB	27196758
TP53	7157	0.000297177	METHIMAZOLE	NCI	7790147
			METHOTREXATE	DTC|CIViC	17363498
			METHYLPREDNISOLONE	NCI	16684279
			MITOMYCIN	CIViC	14514923
			MITOXANTRONE	DTC
			OLAPARIB	JAX-CKB	22172724
			OXALIPLATIN	JAX-CKB|CIViC	24957073|21468686
			PACLITAXEL	JAX-CKB|NCI|CIViC	16459017|24065105
			PAZOPANIB	JAX-CKB|CIViC	26646755|25669829
			PROPYLTHIOURACIL	NCI	7790147
			RITUXIMAB	NCI	11895917
			SIROLIMUS	JAX-CKB|NCI	26144316|16651424
			TEMOZOLOMIDE	JAX-CKB|CIViC	21730979|24248532
			TOPOTECAN	JAX-CKB	26438783
			TRIFLURIDINE	JAX-CKB	25700705
			AZACITIDINE	DTC
			AZATHIOPRINE	DTC
			BEVACIZUMAB	JAX-CKB	27466356|23670029|17145525
			BORTEZOMIB	TALC|CIViC	28679691
			CAPECITABINE	CIViC	24957073
			CARBOPLATIN	JAX-CKB|CIViC	25567130|25658463|11595686|26494859|27998224
			CHLORAMBUCIL	DTC
			CISPLATIN	JAX-CKB|NCI|CIViC	25376608|25567130|9600935|11595686|25964101|23428903|26086967|11812076|27179933|8678559|14514923|23839309|28652249|18618574|26294215
			CLADRIBINE	DTC
			CYCLOPHOSPHAMIDE	JAX-CKB|PharmGKB	17388661|16243804|26438783
			CYTARABINE	JAX-CKB
			DASATINIB	JAX-CKB	26855149
			DAUNORUBICIN	JAX-CKB	16243804
			DOCETAXEL	JAX-CKB|CIViC	21399868|22425996
			DOXORUBICIN	DTC|JAX-CKB|CIViC	25658463|21399868|16243804|23165797|26826118|26288684|22698404|17363498|9569050|24065105
			EPIRUBICIN	JAX-CKB|PharmGKB	17388661|22903472
			ETOPOSIDE	JAX-CKB|CIViC	25964101|14514923|24065105
			FANCHININ	DTC
			FLUOROURACIL	DTC|PharmGKB
			GEMCITABINE	JAX-CKB	27167172|23520471|21389100|27815358|26228206
			IBRUTINIB	JAX-CKB	26563132
			IFOSFAMIDE	JAX-CKB	23165797
			IRINOTECAN	JAX-CKB	25567130
			MELPHALAN	DTC
			MERCAPTOPURINE	DTC
			VORINOSTAT	JAX-CKB|CIViC	26009011|25669829
TUBA1A	7846	0.00713224	VINBLASTINE	DTC	9664292|23708010|1818332|18220533|15579115|23916255|14619954
			IXABEPILONE	ChemblInteractions
			CABAZITAXEL	ChemblInteractions
			VINORELBINE	DTC	25768699
			VORINOSTAT	DTC	20491440
			COLCHICINE	DTC|ChemblInteractions	23750455|25805446|24502232|25061803|25937236|24773591|25938266
			VINCRISTINE	DTC	16539377|21664138|23916255
			PACLITAXEL	DTC|ChemblInteractions	23631389|25369367|25768699|24457094|22595423|23313639|17887662|23387901|19758808|23725535|24953821
UBE2I	7329	0.00988113	CISPLATIN	PharmGKB	19859084
			IRINOTECAN	PharmGKB	19859084
VHL	7428	0.00505201	TEMSIROLIMUS	CIViC	16341243
			OLAPARIB	JAX-CKB	28346230
			RUXOLITINIB	CIViC	27518686
			EVEROLIMUS	JAX-CKB|CIViC	26951309
			SUNITINIB	JAX-CKB	22105611|26487278
			BEVACIZUMAB	JAX-CKB	16827904|22931246

## Sheet: Table S8
Table S8. Dataset sources and sample size statistics
TCGA	Detail	Num	GTEx	Num
ACC	Adrenocortical carcinoma	77	Adrenal Gland	128
BLCA	Bladder Urothelial Carcinoma	407	Bladder	9
BRCA	Breast invasive carcinoma	1092	Breast	179
CESC	Cervical squamous cell carcinoma and endocervical adenocarcinoma	304	Cervix Uteri	10
COAD	Colon adenocarcinoma	288	Colon	308
ESCA	Esophageal carcinoma	181	Esophagus	271
GBM	Glioblastoma multiforme	153	Brain	207
KICH	Kidney Chromophobe	66	Kidney	28
KIRC	Kidney renal clear cell carcinoma	530	Kidney	28
KIRP	Kidney renal papillary cell carcinoma	288	Kidney	28
LGG	Brain Lower Grade Glioma	509	Brain	207
LIHC	Liver hepatocellular carcinoma	369	Liver	110
LUAD	Lung adenocarcinoma	513	Lung	288
LUSC	Lung squamous cell carcinoma	498	Lung	288
OV	Ovarian serous cystadenocarcinoma	419	Ovary	88
PAAD	Pancreatic adenocarcinoma	178	Pancreas	167
PRAD	Prostate adenocarcinoma	495	Prostate	100
READ	Rectum adenocarcinoma	92	Colon	308
SKCM	Skin Cutaneous Melanoma	469	Skin	556
STAD	Stomach adenocarcinoma	414	Stomach	174
TGCT	Testicular Germ Cell Tumors	148	Testis	165
THCA	Thyroid carcinoma	504	Thyroid	279
THYM	Thymoma	119	Blood	337
UCEC	Uterine Corpus Endometrial Carcinoma	180	Uterus	78
UCS	Uterine Carcinosarcoma	57	Uterus	78

## Sheet: Table S9
Table S9. Details of cancer cell lines from CCLE database
DepMap ID	Cell line name	Age	Gender	Sample collection site	Primary disease	Primary/Metastasis	Source
ACH-000018	T24	82	Female	urinary tract	Bladder Cancer	Primary	ATCC
ACH-000142	CAL29	80	Female	urinary tract	Bladder Cancer	Primary	DSMZ
ACH-000242	RT4	63	Male	urinary tract	Bladder Cancer	Primary	ATCC
ACH-000384	SW780	80	Female	urinary tract	Bladder Cancer	Primary	ATCC
ACH-000396	J82	58	Male	urinary tract	Bladder Cancer	Primary	ATCC
ACH-000473	RT112		Female	urinary tract	Bladder Cancer	Primary	DSMZ
ACH-000486	KU1919	76	Female	urinary tract	Bladder Cancer		DSMZ
ACH-000522	UMUC3		Male	urinary tract	Bladder Cancer	Primary	ATCC
ACH-000547	HT1197	44	Male	urinary tract	Bladder Cancer	Primary	ATCC
ACH-000566	SW1710	84	Female	urinary tract	Bladder Cancer	Primary	DSMZ
ACH-000720	TCCSUP	67	Female	urinary tract	Bladder Cancer	Primary	ATCC
ACH-000724	HT1376	58	Female	urinary tract	Bladder Cancer	Primary	ATCC
ACH-000802	BFTC905	51	Female	urinary tract	Bladder Cancer	Primary	DSMZ
ACH-000896	647V	59	Male	urinary tract	Bladder Cancer	Primary	DSMZ
ACH-000905	5637	68	Male	urinary tract	Bladder Cancer		ATCC
ACH-000973	639V	69	Male	urinary tract	Bladder Cancer	Primary	ATCC
ACH-000040	U118MG	47	Male	central nervous system	Brain Cancer	Primary	ATCC
ACH-000067	HS683	76	Male	central nervous system	Brain Cancer	Primary	ATCC
ACH-000075	U87MG	44	Male	central nervous system	Brain Cancer	Primary	ATCC
ACH-000098	GAMG	42	Female	central nervous system	Brain Cancer	Primary	DSMZ
ACH-000137	8MGBA	54	Female	central nervous system	Brain Cancer	Primary	DSMZ
ACH-000200	NMCG1		Female	central nervous system	Brain Cancer	Primary	HSRRB
ACH-000231	KALS1	74	Female	central nervous system	Brain Cancer	Primary	HSRRB
ACH-000244	DKMG	67	Female	central nervous system	Brain Cancer	Primary	DSMZ
ACH-000269	AM38	36	Male	central nervous system	Brain Cancer	Primary	HSRRB
ACH-000273	SF539	34	Female	central nervous system	Brain Cancer	Primary	Academic lab
ACH-000323	42MGBA	63	Male	central nervous system	Brain Cancer	Primary	DSMZ
ACH-000376	SF295	67	Female	central nervous system	Brain Cancer	Primary	NCI/DCTD
ACH-000389	H4	37	Male	central nervous system	Brain Cancer	Primary	ATCC
ACH-000437	SW1088	72	Male	central nervous system	Brain Cancer	Primary	ATCC
ACH-000464	CAS1	63	Male	central nervous system	Brain Cancer	Primary	ICLC
ACH-000469	YH13	40	Male	central nervous system	Brain Cancer	Primary	HSRRB
ACH-000504	SNB75	75	Female	central nervous system	Brain Cancer	Primary	Academic lab
ACH-000558	A172	53	Male	central nervous system	Brain Cancer	Primary	ATCC
ACH-000570	YKG1	53	Female	central nervous system	Brain Cancer	Primary	HSRRB
ACH-000571	T98G	61	Male	central nervous system	Brain Cancer	Primary	ATCC
ACH-000595	LN229	60	Female	central nervous system	Brain Cancer	Primary	ATCC
ACH-000609	SF126	50	Female	central nervous system	Brain Cancer	Primary	HSRRB
ACH-000622	KNS42	16	Male	central nervous system	Brain Cancer	Primary	HSRRB
ACH-000631	KS1	45	Female	central nervous system	Brain Cancer	Primary	HSRRB
ACH-000655	SF268	24	Male	central nervous system	Brain Cancer	Primary	Academic lab
ACH-000738	GB1	35	Male	central nervous system	Brain Cancer	Primary	HSRRB
ACH-000756	GI1	61	Male	central nervous system	Brain Cancer	Primary	RIKEN
ACH-000819	LN18	65	Male	central nervous system	Brain Cancer	Primary	ATCC
ACH-000863	DBTRG05MG	59	Female	central nervous system	Brain Cancer	Primary	ATCC
ACH-000883	SW1783	68	Male	central nervous system	Brain Cancer	Primary	ATCC
ACH-001016	BECKER	57	Male	central nervous system	Brain Cancer		HSRRB
ACH-001605	NO10	62	Male	central nervous system	Brain Cancer	Primary	JCRB
ACH-000828	ZR7530	47	Female	ascites	Breast Cancer	Metastasis	ATCC
ACH-000111	HCC1187	41	Female	breast	Breast Cancer	Primary	ATCC
ACH-000148	HS578T	74	Female	breast	Breast Cancer	Primary	ATCC
ACH-000196	HCC1599	44	Female	breast	Breast Cancer	Primary	ATCC
ACH-000223	HCC1937	24	Female	breast	Breast Cancer	Primary	ATCC
ACH-000276	HCC38	50	Female	breast	Breast Cancer	Primary	ATCC
ACH-000277	HCC1419	42	Female	breast	Breast Cancer	Primary	ATCC
ACH-000288	BT549	72	Female	breast	Breast Cancer	Primary	ATCC
ACH-000349	HCC1500	32	Female	breast	Breast Cancer	Primary	ATCC
ACH-000374	HCC1143	52	Female	breast	Breast Cancer	Primary	ATCC
ACH-000536	BT20	74	Female	breast	Breast Cancer	Primary	ATCC
ACH-000554	UACC893	57	Female	breast	Breast Cancer	Primary	ATCC
ACH-000568	UACC812	43	Female	breast	Breast Cancer	Primary	ATCC
ACH-000643	HDQP1	50	Female	breast	Breast Cancer	Primary	DSMZ
ACH-000668	HCC70	49	Female	breast	Breast Cancer	Primary	ATCC
ACH-000691	HCC2157	48	Female	breast	Breast Cancer	Primary	ATCC
ACH-000699	HCC1395	43	Female	breast	Breast Cancer	Primary	ATCC
ACH-000755	HCC2218	38	Female	breast	Breast Cancer	Primary	ATCC
ACH-000818	BT483	23	Female	breast	Breast Cancer	Primary	ATCC
ACH-000857	CAL851	35	Female	breast	Breast Cancer	Primary	DSMZ
ACH-000859	HCC1954	61	Female	breast	Breast Cancer	Primary	ATCC
ACH-000927	BT474	60	Female	breast	Breast Cancer	Primary	ATCC
ACH-000930	HCC1569	70	Female	breast	Breast Cancer	Primary	ATCC
ACH-000019	MCF7	69	Female	pleural effusion	Breast Cancer	Metastasis	ATCC
ACH-000117	EFM192A	46	Female	pleural effusion	Breast Cancer	Metastasis	DSMZ
ACH-000147	T47D	54	Female	pleural effusion	Breast Cancer	Metastasis	ATCC
ACH-000212	CAL120	43	Female	pleural effusion	Breast Cancer	Metastasis	DSMZ
ACH-000248	AU565	43	Female	pleural effusion	Breast Cancer	Metastasis	ATCC
ACH-000330	EFM19	50	Female	pleural effusion	Breast Cancer	Metastasis	DSMZ
ACH-000352	HCC1428	49	Female	pleural effusion	Breast Cancer	Metastasis	ATCC
ACH-000573	MDAMB436	43	Female	pleural effusion	Breast Cancer	Metastasis	ATCC
ACH-000621	MDAMB157	44	Female	pleural effusion	Breast Cancer	Metastasis	ATCC
ACH-000711	JIMT1	62	Female	pleural effusion	Breast Cancer	Metastasis	DSMZ
ACH-000759	MDAMB175VII	56	Female	pleural effusion	Breast Cancer	Metastasis	ATCC
ACH-000768	MDAMB231	51	Female	pleural effusion	Breast Cancer	Metastasis	ATCC
ACH-000783	CAMA1	51	Female	pleural effusion	Breast Cancer	Metastasis	ATCC
ACH-000849	MDAMB468	51	Female	pleural effusion	Breast Cancer	Metastasis	ATCC
ACH-000856	CAL51	45	Female	pleural effusion	Breast Cancer	Metastasis	DSMZ
ACH-000876	MDAMB415	38	Female	pleural effusion	Breast Cancer	Metastasis	ATCC
ACH-000902	CAL148	58	Female	pleural effusion	Breast Cancer	Metastasis	DSMZ
ACH-001819	MFM223	Adult	Female	pleural effusion	Breast Cancer	Metastasis	DSMZ
ACH-001820	COLO824	52	Female	pleural effusion	Breast Cancer	Metastasis	DSMZ
ACH-000556	SIHA	55	Female	cervix	Cervical Cancer		ATCC
ACH-001086	HELA	30	Female	cervix	Cervical Cancer		ATCC
ACH-001333	C33A	66	Female	cervix	Cervical Cancer	Primary	ATCC
ACH-001334	C4I	41	Female	cervix	Cervical Cancer	Primary	ATCC
ACH-001341	DOTC24510		Female	cervix	Cervical Cancer	Primary	ATCC
ACH-001402	SW756	46	Female	cervix	Cervical Cancer	Primary	ATCC
ACH-001650	SISO	67	Female	cervix	Cervical Cancer	Primary	DSMZ
ACH-001360	MS751	47	Female	lymph node	Cervical Cancer	Metastasis	ATCC
ACH-001525	HT3	58	Female	lymph node	Cervical Cancer	Metastasis	ATCC
ACH-001336	CASKI	40	Female	small intestine	Cervical Cancer	Metastasis	ATCC
ACH-000360	NCIH508	55	Male	abdomen	Colon/Colorectal Cancer	Metastasis	ATCC
ACH-000722	SNUC1	71	Male	abdomen	Colon/Colorectal Cancer	Metastasis	ATCC
ACH-000989	SNU175	56	Female	abdomen	Colon/Colorectal Cancer	Metastasis	KCLB
ACH-000400	SKCO1	65	Male	ascites	Colon/Colorectal Cancer	Metastasis	ATCC
ACH-000491	NCIH716	33	Male	ascites	Colon/Colorectal Cancer	Metastasis	ATCC
ACH-000009	C2BBE1	72	Male	colon	Colon/Colorectal Cancer	Primary	ATCC
ACH-000236	SW1417	53	Female	colon	Colon/Colorectal Cancer	Primary	ATCC
ACH-000249	CL11		Male	colon	Colon/Colorectal Cancer	Primary	DSMZ
ACH-000489	SW1116	73	Male	colon	Colon/Colorectal Cancer	Primary	ATCC
ACH-000501	LS123	65	Female	colon	Colon/Colorectal Cancer	Primary	ATCC
ACH-000680	SW948	81	Female	colon	Colon/Colorectal Cancer	Primary	ATCC
ACH-000943	RKO			colon	Colon/Colorectal Cancer	Primary	ATCC
ACH-000957	LS180	58	Female	colon	Colon/Colorectal Cancer	Primary	ATCC
ACH-000958	SW48	83	Female	colon	Colon/Colorectal Cancer	Primary	ATCC
ACH-000970	SNUC5	77	Female	colon	Colon/Colorectal Cancer		KCLB
ACH-000986	HT115			colon	Colon/Colorectal Cancer		ECACC
ACH-000991	SNU81	53	Male	colon	Colon/Colorectal Cancer		KCLB
ACH-001345	GP5D	71	Female	colon	Colon/Colorectal Cancer	Primary	Sigma-Aldrich
ACH-000007	LS513	63	Male	large intestine	Colon/Colorectal Cancer	Primary	ATCC
ACH-000252	LS1034	54	Male	large intestine	Colon/Colorectal Cancer	Primary	ATCC
ACH-000403	NCIH747	69	Male	large intestine	Colon/Colorectal Cancer	Metastasis	ATCC
ACH-000421	SW837	53	Male	large intestine	Colon/Colorectal Cancer	Primary	ATCC
ACH-000470	SW1463	66	Female	large intestine	Colon/Colorectal Cancer	Primary	ATCC
ACH-000552	HT29	44	Female	large intestine	Colon/Colorectal Cancer	Primary	ATCC
ACH-000565	RCM1	73	Female	large intestine	Colon/Colorectal Cancer	Primary	HSRRB
ACH-000926	HT55			large intestine	Colon/Colorectal Cancer	Primary	ECACC
ACH-000935	MDST8			large intestine	Colon/Colorectal Cancer		ECACC
ACH-000963	CCK81	62	Female	large intestine	Colon/Colorectal Cancer	Metastasis	HSRRB
ACH-000969	KM12			large intestine	Colon/Colorectal Cancer	Primary	JCRB
ACH-000971	HCT116	48	Male	large intestine	Colon/Colorectal Cancer	Primary	ATCC
ACH-000985	LS411N	32	Male	large intestine	Colon/Colorectal Cancer	Primary	ATCC
ACH-000997	HCT15	67	Male	large intestine	Colon/Colorectal Cancer	Primary	ATCC
ACH-000998	CW2	55	Female	large intestine	Colon/Colorectal Cancer	Primary	RIKEN
ACH-000350	COLO678	69	Male	lymph node	Colon/Colorectal Cancer	Metastasis	DSMZ
ACH-000651	SW620	51	Male	lymph node	Colon/Colorectal Cancer	Metastasis	ATCC
ACH-000950	LOVO	56	Male	lymph node	Colon/Colorectal Cancer	Metastasis	ATCC
ACH-000955	SNU407	37	Male	soft tissue	Colon/Colorectal Cancer	Metastasis	KCLB
ACH-000192	MFE280	77	Female	endometrium	Endometrial/Uterine Cancer	Primary	DSMZ
ACH-000293	KLE	68	Female	endometrium	Endometrial/Uterine Cancer	Primary	ATCC
ACH-000864	COLO684	63	Female	endometrium	Endometrial/Uterine Cancer	Primary	ECACC
ACH-000879	MFE296	68	Female	endometrium	Endometrial/Uterine Cancer	Primary	DSMZ
ACH-000940	AN3CA	55	Female	endometrium	Endometrial/Uterine Cancer	Metastasis	ATCC
ACH-000978	EN	50	Female	endometrium	Endometrial/Uterine Cancer	Primary	DSMZ
ACH-000988	MFE319	81	Female	endometrium	Endometrial/Uterine Cancer		DSMZ
ACH-001517	HEC1	71	Female	endometrium	Endometrial/Uterine Cancer	Primary	JCRB
ACH-000974	SNGM	52	Female	lymph node	Endometrial/Uterine Cancer	Metastasis	HSRRB
ACH-000305	ECGI10	65	Male	lymph node	Esophageal Cancer		RIKEN
ACH-000917	TE4	48	Male	lymph node	Esophageal Cancer		RIKEN
ACH-001368	OACM51	47	Female	lymph node	Esophageal Cancer	Metastasis	DSMZ
ACH-000318	TE10	58	Male	oesophagus	Esophageal Cancer	Primary	RIKEN
ACH-000353	TE15	58	Female	oesophagus	Esophageal Cancer	Primary	RIKEN
ACH-000383	OE33	73	Female	oesophagus	Esophageal Cancer	Primary	HPACC
ACH-000408	TE5	73	Female	oesophagus	Esophageal Cancer		RIKEN
ACH-000452	TE8	63	Male	oesophagus	Esophageal Cancer		RIKEN
ACH-000488	TE11	58	Male	oesophagus	Esophageal Cancer	Primary	RIKEN
ACH-000544	OE21	74	Male	oesophagus	Esophageal Cancer	Primary	HPACC
ACH-000605	TE6	71	Male	oesophagus	Esophageal Cancer		RIKEN
ACH-000637	KYSE520	58	Female	oesophagus	Esophageal Cancer	Primary	DSMZ
ACH-000647	TE1	58	Male	oesophagus	Esophageal Cancer	Primary	JCRB
ACH-000679	OE19	72	Male	oesophagus	Esophageal Cancer	Primary	HPACC
ACH-000693	KYSE180	53	Male	oesophagus	Esophageal Cancer	Primary	DSMZ
ACH-000717	COLO680N	57	Female	oesophagus	Esophageal Cancer		DSMZ
ACH-000784	KYSE70	77	Male	oesophagus	Esophageal Cancer	Primary	DSMZ
ACH-000809	KYSE410	51	Male	oesophagus	Esophageal Cancer	Primary	DSMZ
ACH-000823	KYSE140	54	Male	oesophagus	Esophageal Cancer	Primary	DSMZ
ACH-000824	KYSE510	67	Female	oesophagus	Esophageal Cancer	Primary	DSMZ
ACH-000855	KYSE150	49	Female	oesophagus	Esophageal Cancer	Primary	DSMZ
ACH-000865	KYSE450	59	Male	oesophagus	Esophageal Cancer	Primary	DSMZ
ACH-000873	KYSE270	79	Male	oesophagus	Esophageal Cancer	Primary	DSMZ
ACH-001496	ESO26	56	Male	oesophagus	Esophageal Cancer	Primary	Sigma-Aldrich
ACH-001497	ESO51	74	Male	oesophagus	Esophageal Cancer	Primary	Sigma-Aldrich
ACH-001500	FLO1	68	Male	oesophagus	Esophageal Cancer	Primary	Sigma-Aldrich
ACH-001654	SKGT4	89	Male	oesophagus	Esophageal Cancer	Primary	Sigma-Aldrich
ACH-000694	TE9	48	Male	pleural effusion	Esophageal Cancer	Metastasis	RIKEN
ACH-000303	SNU5	33	Female	ascites	Gastric Cancer	Metastasis	ATCC
ACH-000581	SNU16	33	Female	ascites	Gastric Cancer	Metastasis	ATCC
ACH-000144	RERFGC1B	41	Male	lymph node	Gastric Cancer	Metastasis	HSRRB
ACH-000674	NUGC4	35	Female	lymph node	Gastric Cancer	Metastasis	RIKEN
ACH-000678	MKN7	39	Male	lymph node	Gastric Cancer	Metastasis	RIKEN
ACH-000847	HGC27			lymph node	Gastric Cancer	Metastasis	ECACC
ACH-000949	TGBC11TKB	72	Female	lymph node	Gastric Cancer	Metastasis	RIKEN
ACH-000793	KATOIII	57	Male	pleural effusion	Gastric Cancer	Metastasis	ATCC
ACH-000616	HS746T	74	Male	soft tissue	Gastric Cancer	Metastasis	ATCC
ACH-000911	NUGC3	72	Male	soft tissue	Gastric Cancer	Metastasis	JHSF
ACH-000247	OCUM1	38	Female	stomach	Gastric Cancer	Metastasis	HSRRB
ACH-000633	FU97	66	Female	stomach	Gastric Cancer	Primary	HSRRB
ACH-000880	AGS	54	Female	stomach	Gastric Cancer	Primary	ATCC
ACH-000919	IM95	63	Male	stomach	Gastric Cancer	Primary	HSRRB
ACH-000932	SNU1	44	Male	stomach	Gastric Cancer	Metastasis	ATCC
ACH-000948	2313287	72	Male	stomach	Gastric Cancer	Primary	DSMZ
ACH-001653	SKGT2	72	Male	stomach	Gastric Cancer	Primary	Sigma-Aldrich
ACH-000159	OSRC2	52	Male	kidney	Kidney Cancer	Primary	RIKEN
ACH-000171	VMRCRCZ			kidney	Kidney Cancer	Primary	HSRRB
ACH-000189	RCC10RGB		Male	kidney	Kidney Cancer	Primary	RIKEN
ACH-000250	KMRC20			kidney	Kidney Cancer	Primary	HSRRB
ACH-000411	769P	63	Female	kidney	Kidney Cancer	Primary	ATCC
ACH-000429	A704	78	Male	kidney	Kidney Cancer	Primary	ATCC
ACH-000484	VMRCRCW		Male	kidney	Kidney Cancer	Primary	RIKEN
ACH-000555	A498	52	Female	kidney	Kidney Cancer	Primary	ATCC
ACH-000684	KMRC1	Adult	Male	kidney	Kidney Cancer	Primary	HSRRB
ACH-000792	BFTC909	64	Male	kidney	Kidney Cancer	Primary	DSMZ
ACH-001398	SW156	75	Male	kidney	Kidney Cancer	Primary	ATCC
ACH-000046	ACHN	22	Male	pleural effusion	Kidney Cancer	Metastasis	ATCC
ACH-000457	CAL54	75	Male	pleural effusion	Kidney Cancer	Metastasis	DSMZ
ACH-000361	SKHEP1	52	Male	ascites	Liver Cancer	Metastasis	ATCC
ACH-000577	JHH2	57	Male	ascites	Liver Cancer	Metastasis	HSRRB
ACH-000217	JHH6	57	Female	liver	Liver Cancer	Primary	HSRRB
ACH-000221	SNU398	42	Male	liver	Liver Cancer	Primary	ATCC
ACH-000420	SNU449	52	Male	liver	Liver Cancer	Primary	ATCC
ACH-000475	HUH1	53	Male	liver	Liver Cancer	Primary	HSRRB
ACH-000476	JHH4	51	Male	liver	Liver Cancer	Primary	HSRRB
ACH-000478	SNU387	41	Female	liver	Liver Cancer	Primary	ATCC
ACH-000480	HUH7	57	Male	liver	Liver Cancer	Primary	HSRRB
ACH-000493	SNU423	40	Male	liver	Liver Cancer	Primary	ATCC
ACH-000620	JHH1	50	Male	liver	Liver Cancer	Primary	HSRRB
ACH-000625	HEP3B217	8	Male	liver	Liver Cancer	Primary	ATCC
ACH-000848	JHH7	53	Male	liver	Liver Cancer	Primary	HSRRB
ACH-000121	NCIH2405	47	Male	ascites	Lung Cancer	Metastasis	ATCC
ACH-000282	NCIH1755	65	Female	liver	Lung Cancer	Metastasis	ATCC
ACH-000012	HCC827	39	Female	lung	Lung Cancer	Primary	ATCC
ACH-000030	PC14	45	Male	lung	Lung Cancer	Primary	RIKEN
ACH-000062	RERFLCMS		Male	lung	Lung Cancer	Primary	JCRB
ACH-000176	LOUNH91	64	Female	lung	Lung Cancer	Primary	DSMZ
ACH-000337	NCIH3122		Male	lung	Lung Cancer		Academic lab
ACH-000343	NCIH522	58	Male	lung	Lung Cancer	Primary	ATCC
ACH-000395	NCIH520		Male	lung	Lung Cancer	Primary	ATCC
ACH-000442	RERFLCSQ1	74	Female	lung	Lung Cancer	Primary	HSRRB
ACH-000447	NCIH2228		Female	lung	Lung Cancer	Primary	ATCC
ACH-000451	NCIH2085	45	Male	lung	Lung Cancer	Primary	ATCC
ACH-000481	NCIH2170		Male	lung	Lung Cancer	Primary	ATCC
ACH-000482	RERFLCKJ	78	Male	lung	Lung Cancer	Primary	HSRRB
ACH-000585	EPLC272H	57	Male	lung	Lung Cancer	Primary	DSMZ
ACH-000587	NCIH1975		Female	lung	Lung Cancer	Primary	ATCC
ACH-000667	HCC44	54	Female	lung	Lung Cancer	Primary	DSMZ
ACH-000675	NCIH1734	56	Female	lung	Lung Cancer	Primary	ATCC
ACH-000677	SW1573	44	Female	lung	Lung Cancer	Primary	ATCC
ACH-000681	A549	58	Male	lung	Lung Cancer	Primary	ATCC
ACH-000706	EKVX		Male	lung	Lung Cancer	Primary	Academic lab
ACH-000733	NCIH1838		Female	lung	Lung Cancer	Primary	ATCC
ACH-000769	LK2	74	Male	lung	Lung Cancer	Primary	RIKEN
ACH-000787	LXF289	62	Male	lung	Lung Cancer	Primary	DSMZ
ACH-000852	NCIH1435	35	Female	lung	Lung Cancer	Primary	ATCC
ACH-000860	NCIH358		Male	lung	Lung Cancer	Primary	ATCC
ACH-000861	HOP62	60	Female	lung	Lung Cancer	Primary	Academic lab
ACH-000875	NCIH2347	54	Female	lung	Lung Cancer	Primary	ATCC
ACH-000878	HCC15	47	Male	lung	Lung Cancer	Primary	DSMZ
ACH-000888	NCIH1793	52	Female	lung	Lung Cancer	Primary	ATCC
ACH-000892	NCIH1563		Male	lung	Lung Cancer	Primary	ATCC
ACH-000893	NCIH1651	71	Male	lung	Lung Cancer	Primary	ATCC
ACH-000900	NCIH23	51	Male	lung	Lung Cancer	Primary	ATCC
ACH-000945	NCIH650		Male	lung	Lung Cancer	Metastasis	ATCC
ACH-000951	NCIH2342	55	Male	lung	Lung Cancer	Primary	ATCC
ACH-000021	NCIH1693	55	Female	lymph node	Lung Cancer	Metastasis	ATCC
ACH-000416	NCIH838	59	Male	lymph node	Lung Cancer	Metastasis	ATCC
ACH-000521	NCIH2030		Male	lymph node	Lung Cancer	Metastasis	ATCC
ACH-000718	NCIH2291		Male	lymph node	Lung Cancer	Metastasis	ATCC
ACH-000744	NCIH1623	58	Male	lymph node	Lung Cancer	Metastasis	ATCC
ACH-000766	NCIH1648	39	Male	lymph node	Lung Cancer	Metastasis	ATCC
ACH-000781	NCIH2023	26	Male	lymph node	Lung Cancer	Metastasis	ATCC
ACH-000841	NCIH2087	69	Male	lymph node	Lung Cancer	Metastasis	ATCC
ACH-000869	NCIH1568	48	Female	lymph node	Lung Cancer	Metastasis	ATCC
ACH-000886	NCIH2009	68	Female	lymph node	Lung Cancer	Metastasis	ATCC
ACH-000638	NCIH441	33	Male	pericardial effusion	Lung Cancer	Metastasis	ATCC
ACH-000035	NCIH1650	27	Male	pleural effusion	Lung Cancer	Metastasis	ATCC
ACH-000161	CORL105		Male	pleural effusion	Lung Cancer	Metastasis	ECACC
ACH-000264	CALU6	61	Female	pleural effusion	Lung Cancer	Metastasis	ATCC
ACH-000311	NCIH2122	46	Female	pleural effusion	Lung Cancer	Metastasis	ATCC
ACH-000367	NCIH226		Male	pleural effusion	Lung Cancer	Metastasis	ATCC
ACH-000379	NCIH1781	66	Female	pleural effusion	Lung Cancer	Metastasis	ATCC
ACH-000392	CALU3	25	Male	pleural effusion	Lung Cancer	Metastasis	ATCC
ACH-000448	NCIH1666	50	Female	pleural effusion	Lung Cancer	Metastasis	ATCC
ACH-000496	NCIH1792	50	Male	pleural effusion	Lung Cancer	Metastasis	ATCC
ACH-000528	ABC1	47	Male	pleural effusion	Lung Cancer	Metastasis	HSRRB
ACH-000562	HCC78	65	Male	pleural effusion	Lung Cancer	Metastasis	DSMZ
ACH-000589	NCIH1437	60	Male	pleural effusion	Lung Cancer	Metastasis	ATCC
ACH-000665	SKMES1	65	Male	pleural effusion	Lung Cancer	Metastasis	ATCC
ACH-000666	NCIH1355	53	Male	pleural effusion	Lung Cancer	Metastasis	ATCC
ACH-000843	HARA	57	Male	pleural effusion	Lung Cancer	Metastasis	HSRRB
ACH-000894	NCIH1869	58	Male	pleural effusion	Lung Cancer	Metastasis	ATCC
ACH-000414	NCIH1944	62	Female	soft tissue	Lung Cancer	Metastasis	ATCC
ACH-000916	NCIH1573	35	Female	soft tissue	Lung Cancer	Metastasis	ATCC
ACH-000815	KMH2	37	Male	pleural effusion	Lymphoma	Metastasis	DSMZ
ACH-000091	OV56	46	Female	ascites	Ovarian Cancer	Metastasis	ECACC
ACH-000116	OAW28	75	Female	ascites	Ovarian Cancer	Metastasis	ECACC
ACH-000291	OV90	64	Female	ascites	Ovarian Cancer	Metastasis	ATCC
ACH-000308	EFO21	56	Female	ascites	Ovarian Cancer	Metastasis	DSMZ
ACH-000617	OVCAR4	42	Female	ascites	Ovarian Cancer	Metastasis	NCI/DCTD
ACH-000704	OAW42	46	Female	ascites	Ovarian Cancer	Metastasis	ECACC
ACH-000811	SKOV3	64	Female	ascites	Ovarian Cancer	Metastasis	ATCC
ACH-000947	OVK18	49	Female	ascites	Ovarian Cancer	Metastasis	RIKEN
ACH-000962	OC314	39	Female	ascites	Ovarian Cancer	Metastasis	ICLC
ACH-001151	OVCAR5	67	Female	ascites	Ovarian Cancer	Metastasis	Academic lab
ACH-001373	OV17R	50	Female	ascites	Ovarian Cancer	Metastasis	Sigma-Aldrich
ACH-001630	PEO1		Female	ascites	Ovarian Cancer	Metastasis	Sigma-Aldrich
ACH-000527	OVISE	40	Female	bone	Ovarian Cancer	Metastasis	HSRRB
ACH-000048	TOV112D	42	Female	ovary	Ovarian Cancer	Primary	ATCC
ACH-000103	CAOV4	45	Female	ovary	Ovarian Cancer	Metastasis	ATCC
ACH-000132	JHOS2	45	Female	ovary	Ovarian Cancer	Primary	RIKEN
ACH-000443	OVKATE	40	Female	ovary	Ovarian Cancer	Primary	HSRRB
ACH-000574	FUOV1	65	Female	ovary	Ovarian Cancer	Primary	DSMZ
ACH-000584	JHOS4	44	Female	ovary	Ovarian Cancer	Primary	RIKEN
ACH-000688	OV7	78	Female	ovary	Ovarian Cancer	Primary	ECACC
ACH-000696	OVCAR8	64	Female	ovary	Ovarian Cancer	Primary	NCI/DCTD
ACH-000713	CAOV3	54	Female	ovary	Ovarian Cancer	Primary	ATCC
ACH-000885	TOV21G	62	Female	ovary	Ovarian Cancer	Primary	ATCC
ACH-000966	IGROV1	47	Female	ovary	Ovarian Cancer	Primary	NCI/DCTD
ACH-000663	OVTOKO	78	Female	spleen	Ovarian Cancer	Metastasis	HSRRB
ACH-000094	HPAFII	44	Male	ascites	Pancreatic Cancer	Metastasis	ATCC
ACH-000118	HUPT3	66	Male	ascites	Pancreatic Cancer	Metastasis	DSMZ
ACH-000213	HUPT4	60	Male	ascites	Pancreatic Cancer	Metastasis	DSMZ
ACH-000222	ASPC1	62	Female	ascites	Pancreatic Cancer	Metastasis	ATCC
ACH-000265	KP4	50	Male	ascites	Pancreatic Cancer	Metastasis	RIKEN
ACH-000332	YAPC	43	Male	ascites	Pancreatic Cancer	Metastasis	DSMZ
ACH-000023	PATU8988T	64	Female	liver	Pancreatic Cancer	Metastasis	DSMZ
ACH-000114	SU8686	57	Female	liver	Pancreatic Cancer	Metastasis	ATCC
ACH-000138	CFPAC1	26	Male	liver	Pancreatic Cancer	Metastasis	ATCC
ACH-000354	CAPAN1	40	Male	liver	Pancreatic Cancer	Metastasis	ATCC
ACH-000652	SUIT2	73	Male	liver	Pancreatic Cancer	Metastasis	HSRRB
ACH-000178	HS766T	64	Male	lymph node	Pancreatic Cancer	Metastasis	ATCC
ACH-000042	PANC0203	70	Female	pancreas	Pancreatic Cancer	Primary	ATCC
ACH-000060	PANC1005	81	Male	pancreas	Pancreatic Cancer	Primary	ATCC
ACH-000107	CAPAN2	56	Male	pancreas	Pancreatic Cancer	Primary	ATCC
ACH-000139	PANC0327	65	Female	pancreas	Pancreatic Cancer	Primary	ATCC
ACH-000235	PANC0403	70	Male	pancreas	Pancreatic Cancer	Primary	ATCC
ACH-000243	DANG	68	Female	pancreas	Pancreatic Cancer		DSMZ
ACH-000270	HPAC	64	Female	pancreas	Pancreatic Cancer	Primary	ATCC
ACH-000281	KP2	65	Female	pancreas	Pancreatic Cancer	Primary	HSRRB
ACH-000320	PSN1	36	Male	pancreas	Pancreatic Cancer	Primary	ECACC
ACH-000417	PANC0813	85	Male	pancreas	Pancreatic Cancer	Primary	ATCC
ACH-000535	BXPC3	61	Female	pancreas	Pancreatic Cancer	Primary	ATCC
ACH-000599	PATU8902	44	Female	pancreas	Pancreatic Cancer	Primary	DSMZ
ACH-000601	MIAPACA2	65	Male	pancreas	Pancreatic Cancer	Primary	ATCC
ACH-000155	SW1990	56	Male	spleen	Pancreatic Cancer	Primary	ATCC
ACH-000090	PC3	62	Male	bone	Prostate Cancer	Metastasis	ATCC
ACH-000115	VCAP	59	Male	bone	Prostate Cancer	Metastasis	ATCC
ACH-000977	LNCAPCLONEFGC	50	Male	lymph node	Prostate Cancer	Metastasis	ATCC
ACH-000348	RPMI7951	18	Female	lymph node	Skin Cancer	Metastasis	ATCC
ACH-000423	SKMEL3	42	Female	lymph node	Skin Cancer	Metastasis	ATCC
ACH-000650	IGR37	26	Male	lymph node	Skin Cancer	Metastasis	DSMZ
ACH-000730	SKMEL5	24	Female	lymph node	Skin Cancer	Metastasis	ATCC
ACH-000750	LOXIMVI	58	Male	lymph node	Skin Cancer	Metastasis	NCI/DCTD
ACH-000788	A2058	43	Male	lymph node	Skin Cancer	Metastasis	ATCC
ACH-000812	COLO783	48	Female	lymph node	Skin Cancer	Metastasis	DSMZ
ACH-000822	SKMEL24	67	Male	lymph node	Skin Cancer	Metastasis	ATCC
ACH-000882	IGR1	42	Male	lymph node	Skin Cancer	Metastasis	DSMZ
ACH-000987	MEWO	78	Male	lymph node	Skin Cancer	Metastasis	ATCC
ACH-000441	SH4	60	Female	pleural effusion	Skin Cancer	Metastasis	ATCC
ACH-000008	A101D	56	Male	skin	Skin Cancer		ATCC
ACH-000219	A375	54	Female	skin	Skin Cancer	Primary	ATCC
ACH-000304	WM115	55	Female	skin	Skin Cancer	Metastasis	ATCC
ACH-000322	HT144	29	Male	skin	Skin Cancer	Metastasis	ATCC
ACH-000401	COLO800	14	Male	skin	Skin Cancer	Metastasis	ATCC
ACH-000425	UACC62			skin	Skin Cancer		NCI/DCTD
ACH-000450	MELHO		Female	skin	Skin Cancer	Primary	DSMZ
ACH-000572	G361	31	Male	skin	Skin Cancer	Primary	ATCC
ACH-000579	UACC257			skin	Skin Cancer	Primary	NCI/DCTD
ACH-000580	C32	53	Male	skin	Skin Cancer	Primary	ATCC
ACH-000615	SKMEL28	51	Male	skin	Skin Cancer		ATCC
ACH-000640	SKMEL31	33	Female	skin	Skin Cancer	Primary	ATCC
ACH-000644	COLO829	45	Male	skin	Skin Cancer	Primary	ATCC
ACH-000805	COLO679	47	Female	skin	Skin Cancer	Metastasis	DSMZ
ACH-000810	SKMEL30	67	Male	skin	Skin Cancer	Metastasis	DSMZ
ACH-000814	HS939T	24	Female	skin	Skin Cancer		ATCC
ACH-000881	MELJUSO	58	Female	skin	Skin Cancer	Primary	DSMZ
ACH-000915	IPC298	64	Female	skin	Skin Cancer	Primary	DSMZ
ACH-001190	SKMEL2	60	Male	skin	Skin Cancer	Metastasis	ATCC
ACH-000191	BHT101	63	Female	lymph node	Thyroid Cancer	Metastasis	DSMZ
ACH-001528	IHH4	75	Male	lymph node	Thyroid Cancer	Metastasis	JCRB
ACH-000174	CAL62	70	Female	pleural effusion	Thyroid Cancer	Primary	DSMZ
ACH-000058	ML1	50	Female	thyroid	Thyroid Cancer		DSMZ
ACH-000456	BCPAP	76	Female	thyroid	Thyroid Cancer	Primary	DSMZ
ACH-000716	TT2609C02	57	Male	thyroid	Thyroid Cancer		DSMZ
ACH-000903	FTC133	42	Male	thyroid	Thyroid Cancer	Metastasis	ECACC
ACH-001306	8305C	67	Female	thyroid	Thyroid Cancer	Primary	DSMZ
ACH-001307	8505C	78	Female	thyroid	Thyroid Cancer	Primary	HSRRB
ACH-001321	TT	77	Female	thyroid	Thyroid Cancer	Primary	ATCC
ACH-001384	RO82W1		Female	thyroid	Thyroid Cancer	Metastasis	Sigma-Aldrich
ACH-001443	ASH3	68	Female	thyroid	Thyroid Cancer	Primary	JCRB

## Sheet: Table S10
Table S10.Details of Immport genesets
Pathways	Symbol	ID	Name
Antigen Processing and Presentation	AZGP1	563	alpha-2-glycoprotein 1, zinc-binding
Antigen Processing and Presentation	B2M	567	beta-2-microglobulin
Antigen Processing and Presentation	CALR	811	calreticulin
Antigen Processing and Presentation	CANX	821	calnexin
Antigen Processing and Presentation	CD1A	909	CD1a molecule
Antigen Processing and Presentation	CD1B	910	CD1b molecule
Antigen Processing and Presentation	CD1C	911	CD1c molecule
Antigen Processing and Presentation	CD1D	912	CD1d molecule
Antigen Processing and Presentation	CD1E	913	CD1e molecule
Antigen Processing and Presentation	CD4	920	CD4 molecule
Antigen Processing and Presentation	CD8A	925	CD8a molecule
Antigen Processing and Presentation	CD8B	926	CD8b molecule
Antigen Processing and Presentation	CD74	972	CD74 molecule
Antigen Processing and Presentation	CREB1	1385	cAMP responsive element binding protein 1
Antigen Processing and Presentation	CTSB	1508	cathepsin B
Antigen Processing and Presentation	CTSE	1510	cathepsin E
Antigen Processing and Presentation	CTSL	1514	cathepsin L
Antigen Processing and Presentation	CTSS	1520	cathepsin S
Antigen Processing and Presentation	FCER1G	2207	Fc fragment of IgE receptor Ig
Antigen Processing and Presentation	FCGRT	2217	Fc fragment of IgG receptor and transporter
Antigen Processing and Presentation	PDIA3	2923	protein disulfide isomerase family A member 3
Antigen Processing and Presentation	HFE	3077	homeostatic iron regulator
Antigen Processing and Presentation	HLA-A	3105	major histocompatibility complex, class I, A
Antigen Processing and Presentation	HLA-B	3106	major histocompatibility complex, class I, B
Antigen Processing and Presentation	HLA-C	3107	major histocompatibility complex, class I, C
Antigen Processing and Presentation	HLA-DMA	3108	major histocompatibility complex, class II, DM alpha
Antigen Processing and Presentation	HLA-DMB	3109	major histocompatibility complex, class II, DM beta
Antigen Processing and Presentation	HLA-DOA	3111	major histocompatibility complex, class II, DO alpha
Antigen Processing and Presentation	HLA-DOB	3112	major histocompatibility complex, class II, DO beta
Antigen Processing and Presentation	HLA-DPA1	3113	major histocompatibility complex, class II, DP alpha 1
Antigen Processing and Presentation	HLA-DPB1	3115	major histocompatibility complex, class II, DP beta 1
Antigen Processing and Presentation	HLA-DQA1	3117	major histocompatibility complex, class II, DQ alpha 1
Antigen Processing and Presentation	HLA-DQA2	3118	major histocompatibility complex, class II, DQ alpha 2
Antigen Processing and Presentation	HLA-DQB1	3119	major histocompatibility complex, class II, DQ beta 1
Antigen Processing and Presentation	HLA-DRA	3122	major histocompatibility complex, class II, DR alpha
Antigen Processing and Presentation	HLA-DRB1	3123	major histocompatibility complex, class II, DR beta 1
Antigen Processing and Presentation	HLA-DRB3	3125	major histocompatibility complex, class II, DR beta 3
Antigen Processing and Presentation	HLA-DRB4	3126	major histocompatibility complex, class II, DR beta 4
Antigen Processing and Presentation	HLA-DRB5	3127	major histocompatibility complex, class II, DR beta 5
Antigen Processing and Presentation	HLA-E	3133	major histocompatibility complex, class I, E
Antigen Processing and Presentation	HLA-F	3134	major histocompatibility complex, class I, F
Antigen Processing and Presentation	HLA-G	3135	major histocompatibility complex, class I, G
Antigen Processing and Presentation	HLA-H	3136	major histocompatibility complex, class I, H (pseudogene)
Antigen Processing and Presentation	MR1	3140	major histocompatibility complex, class I-related
Antigen Processing and Presentation	HSPA1A	3303	heat shock protein family A (Hsp70) member 1A
Antigen Processing and Presentation	HSPA1B	3304	heat shock protein family A (Hsp70) member 1B
Antigen Processing and Presentation	HSPA1L	3305	heat shock protein family A (Hsp70) member 1 like
Antigen Processing and Presentation	HSPA2	3306	heat shock protein family A (Hsp70) member 2
Antigen Processing and Presentation	HSPA4	3308	heat shock protein family A (Hsp70) member 4
Antigen Processing and Presentation	HSPA5	3309	heat shock protein family A (Hsp70) member 5
Antigen Processing and Presentation	HSPA6	3310	heat shock protein family A (Hsp70) member 6
Antigen Processing and Presentation	HSPA8	3312	heat shock protein family A (Hsp70) member 8
Antigen Processing and Presentation	HSP90AA1	3320	heat shock protein 90 alpha family class A member 1
Antigen Processing and Presentation	HSP90AB1	3326	heat shock protein 90 alpha family class B member 1
Antigen Processing and Presentation	ICAM1	3383	intercellular adhesion molecule 1
Antigen Processing and Presentation	IFNA1	3439	interferon alpha 1
Antigen Processing and Presentation	IFNA2	3440	interferon alpha 2
Antigen Processing and Presentation	IFNA4	3441	interferon alpha 4
Antigen Processing and Presentation	IFNA5	3442	interferon alpha 5
Antigen Processing and Presentation	IFNA6	3443	interferon alpha 6
Antigen Processing and Presentation	IFNA7	3444	interferon alpha 7
Antigen Processing and Presentation	IFNA8	3445	interferon alpha 8
Antigen Processing and Presentation	IFNA10	3446	interferon alpha 10
Antigen Processing and Presentation	IFNA13	3447	interferon alpha 13
Antigen Processing and Presentation	IFNA14	3448	interferon alpha 14
Antigen Processing and Presentation	IFNA16	3449	interferon alpha 16
Antigen Processing and Presentation	IFNA17	3451	interferon alpha 17
Antigen Processing and Presentation	IFNA21	3452	interferon alpha 21
Antigen Processing and Presentation	IFNG	3458	interferon gamma
Antigen Processing and Presentation	KIR2DL1	3802	killer cell immunoglobulin like receptor, two Ig domains and long cytoplasmic tail 1
Antigen Processing and Presentation	KIR2DL2	3803	killer cell immunoglobulin like receptor, two Ig domains and long cytoplasmic tail 2
Antigen Processing and Presentation	KIR2DL3	3804	killer cell immunoglobulin like receptor, two Ig domains and long cytoplasmic tail 3
Antigen Processing and Presentation	KIR2DL4	3805	killer cell immunoglobulin like receptor, two Ig domains and long cytoplasmic tail 4
Antigen Processing and Presentation	KIR2DS1	3806	killer cell immunoglobulin like receptor, two Ig domains and short cytoplasmic tail 1
Antigen Processing and Presentation	KIR2DS3	3808	killer cell immunoglobulin like receptor, two Ig domains and short cytoplasmic tail 3
Antigen Processing and Presentation	KIR2DS4	3809	killer cell immunoglobulin like receptor, two Ig domains and short cytoplasmic tail 4
Antigen Processing and Presentation	KIR2DS5	3810	killer cell immunoglobulin like receptor, two Ig domains and short cytoplasmic tail 5
Antigen Processing and Presentation	KIR3DL1	3811	killer cell immunoglobulin like receptor, three Ig domains and long cytoplasmic tail 1
Antigen Processing and Presentation	KIR3DL2	3812	killer cell immunoglobulin like receptor, three Ig domains and long cytoplasmic tail 2
Antigen Processing and Presentation	KLRC1	3821	killer cell lectin like receptor C1
Antigen Processing and Presentation	KLRC2	3822	killer cell lectin like receptor C2
Antigen Processing and Presentation	KLRC3	3823	killer cell lectin like receptor C3
Antigen Processing and Presentation	KLRD1	3824	killer cell lectin like receptor D1
Antigen Processing and Presentation	LTA	4049	lymphotoxin alpha
Antigen Processing and Presentation	CIITA	4261	class II major histocompatibility complex transactivator
Antigen Processing and Presentation	MICA	100507436	MHC class I polypeptide-related sequence A
Antigen Processing and Presentation	MICB	4277	MHC class I polypeptide-related sequence B
Antigen Processing and Presentation	NFYA	4800	nuclear transcription factor Y subunit alpha
Antigen Processing and Presentation	NFYB	4801	nuclear transcription factor Y subunit beta
Antigen Processing and Presentation	NFYC	4802	nuclear transcription factor Y subunit gamma
Antigen Processing and Presentation	LGMN	5641	legumain
Antigen Processing and Presentation	PSMB8	5696	proteasome 20S subunit beta 8
Antigen Processing and Presentation	PSMC1	5700	proteasome 26S subunit, ATPase 1
Antigen Processing and Presentation	PSMC2	5701	proteasome 26S subunit, ATPase 2
Antigen Processing and Presentation	PSMC3	5702	proteasome 26S subunit, ATPase 3
Antigen Processing and Presentation	PSMC4	5704	proteasome 26S subunit, ATPase 4
Antigen Processing and Presentation	PSMC5	5705	proteasome 26S subunit, ATPase 5
Antigen Processing and Presentation	PSMC6	5706	proteasome 26S subunit, ATPase 6
Antigen Processing and Presentation	PSMD1	5707	proteasome 26S subunit, non-ATPase 1
Antigen Processing and Presentation	PSMD2	5708	proteasome 26S subunit, non-ATPase 2
Antigen Processing and Presentation	PSMD3	5709	proteasome 26S subunit, non-ATPase 3
Antigen Processing and Presentation	PSMD4	5710	proteasome 26S subunit, non-ATPase 4
Antigen Processing and Presentation	PSMD5	5711	proteasome 26S subunit, non-ATPase 5
Antigen Processing and Presentation	PSMD7	5713	proteasome 26S subunit, non-ATPase 7
Antigen Processing and Presentation	PSMD8	5714	proteasome 26S subunit, non-ATPase 8
Antigen Processing and Presentation	PSMD10	5716	proteasome 26S subunit, non-ATPase 10
Antigen Processing and Presentation	PSMD11	5717	proteasome 26S subunit, non-ATPase 11
Antigen Processing and Presentation	PSMD13	5719	proteasome 26S subunit, non-ATPase 13
Antigen Processing and Presentation	PSME1	5720	proteasome activator subunit 1
Antigen Processing and Presentation	PSME1	5720	proteasome activator subunit 1
Antigen Processing and Presentation	PSME2	5721	proteasome activator subunit 2
Antigen Processing and Presentation	PSME2	5721	proteasome activator subunit 2
Antigen Processing and Presentation	RELB	5971	RELB proto-oncogene, NF-kB subunit
Antigen Processing and Presentation	RFX5	5993	regulatory factor X5
Antigen Processing and Presentation	RFXAP	5994	regulatory factor X associated protein
Antigen Processing and Presentation	SLC10A2	6555	solute carrier family 10 member 2
Antigen Processing and Presentation	TAP1	6890	transporter 1, ATP binding cassette subfamily B member
Antigen Processing and Presentation	TAP2	6891	transporter 2, ATP binding cassette subfamily B member
Antigen Processing and Presentation	TAPBP	6892	TAP binding protein
Antigen Processing and Presentation	THBS1	7057	thrombospondin 1
Antigen Processing and Presentation	SEM1	7979	SEM1 26S proteasome complex subunit
Antigen Processing and Presentation	KLRC4	8302	killer cell lectin like receptor C4
Antigen Processing and Presentation	AP3B1	8546	adaptor related protein complex 3 subunit beta 1
Antigen Processing and Presentation	RFXANK	8625	regulatory factor X associated ankyrin containing protein
Antigen Processing and Presentation	PSMD6	9861	proteasome 26S subunit, non-ATPase 6
Antigen Processing and Presentation	PSME3	10197	proteasome activator subunit 3
Antigen Processing and Presentation	PSMD14	10213	proteasome 26S subunit, non-ATPase 14
Antigen Processing and Presentation	CLEC4M	10332	C-type lectin domain family 4 member M
Antigen Processing and Presentation	IFI30	10437	IFI30 lysosomal thiol reductase
Antigen Processing and Presentation	PROCR	10544	protein C receptor
Antigen Processing and Presentation	ADRM1	11047	adhesion regulating molecule 1
Antigen Processing and Presentation	ECPAS	23392	Ecm29 proteasome adaptor and scaffold
Antigen Processing and Presentation	TRPC4AP	26133	transient receptor potential cation channel subfamily C member 4 associated protein
Antigen Processing and Presentation	CD209	30835	CD209 molecule
Antigen Processing and Presentation	UBXN1	51035	UBX domain protein 1
Antigen Processing and Presentation	ERAP1	51752	endoplasmic reticulum aminopeptidase 1
Antigen Processing and Presentation	TAPBPL	55080	TAP binding protein like
Antigen Processing and Presentation	KIR2DL5A	57292	killer cell immunoglobulin like receptor, two Ig domains and long cytoplasmic tail 5A
Antigen Processing and Presentation	ERAP2	64167	endoplasmic reticulum aminopeptidase 2
Antigen Processing and Presentation	ULBP3	79465	UL16 binding protein 3
Antigen Processing and Presentation	ULBP2	80328	UL16 binding protein 2
Antigen Processing and Presentation	ULBP1	80329	UL16 binding protein 1
Antigen Processing and Presentation	KIR3DL3	115653	killer cell immunoglobulin like receptor, three Ig domains and long cytoplasmic tail 3
Antigen Processing and Presentation	RAET1E	135250	retinoic acid early transcript 1E
Antigen Processing and Presentation	RAET1L	154064	retinoic acid early transcript 1L
Antigen Processing and Presentation	UBR1	197131	ubiquitin protein ligase E3 component n-recognin 1
Antigen Processing and Presentation	RAET1G	353091	retinoic acid early transcript 1G
Antigen Processing and Presentation	PDIA2	64714	protein disulfide isomerase family A member 2
Antimicrobials	HAMP	57817	hepcidin antimicrobial peptide
Antimicrobials	PI3	5266	peptidase inhibitor 3
Antimicrobials	CAMP	820	cathelicidin antimicrobial peptide
Antimicrobials	DEFB4A	1673	defensin beta 4A
Antimicrobials	PPBP	5473	pro-platelet basic protein
Antimicrobials	REG3G	130120	regenerating family member 3 gamma
Antimicrobials	CXCL14	9547	C-X-C motif chemokine ligand 14
Antimicrobials	CXCL16	58191	C-X-C motif chemokine ligand 16
Antimicrobials	SLPI	6590	secretory leukocyte peptidase inhibitor
Antimicrobials	CXCL8	3576	C-X-C motif chemokine ligand 8
Antimicrobials	CXCL10	3627	C-X-C motif chemokine ligand 10
Antimicrobials	CXCL9	4283	C-X-C motif chemokine ligand 9
Antimicrobials	CXCL5	6374	C-X-C motif chemokine ligand 5
Antimicrobials	CXCL11	6373	C-X-C motif chemokine ligand 11
Antimicrobials	CXCL6	6372	C-X-C motif chemokine ligand 6
Antimicrobials	CXCL1	2919	C-X-C motif chemokine ligand 1
Antimicrobials	CXCL12	6387	C-X-C motif chemokine ligand 12
Antimicrobials	CXCL13	10563	C-X-C motif chemokine ligand 13
Antimicrobials	CXCL2	2920	C-X-C motif chemokine ligand 2
Antimicrobials	PF4	5196	platelet factor 4
Antimicrobials	XCL1	6375	X-C motif chemokine ligand 1
Antimicrobials	CXCL3	2921	C-X-C motif chemokine ligand 3
Antimicrobials	DEFB103B	55894	defensin beta 103B
Antimicrobials	CCL13	6357	C-C motif chemokine ligand 13
Antimicrobials	CCL1	6346	C-C motif chemokine ligand 1
Antimicrobials	DEFB1	1672	defensin beta 1
Antimicrobials	CCL8	6355	C-C motif chemokine ligand 8
Antimicrobials	ELANE	1991	elastase, neutrophil expressed
Antimicrobials	DEFB103A	414325	defensin beta 103A
Antimicrobials	DEFA3	1668	defensin alpha 3
Antimicrobials	DEFA1	1667	defensin alpha 1
Antimicrobials	TMSB10	9168	thymosin beta 10
Antimicrobials	DEFA6	1671	defensin alpha 6
Antimicrobials	DEFA5	1670	defensin alpha 5
Antimicrobials	DEFA4	1669	defensin alpha 4
Antimicrobials	LCN2	3934	lipocalin 2
Antimicrobials	LCN1	3933	lipocalin 1
Antimicrobials	COLEC10	10584	collectin subfamily member 10
Antimicrobials	BPI	671	bactericidal permeability increasing protein
Antimicrobials	S100A9	6280	S100 calcium binding protein A9
Antimicrobials	S100A8	6279	S100 calcium binding protein A8
Antimicrobials	DCD	117159	dermcidin
Antimicrobials	LCN6	158062	lipocalin 6
Antimicrobials	S100A12	6283	S100 calcium binding protein A12
Antimicrobials	HTN3	3347	histatin 3
Antimicrobials	LCN8	138307	lipocalin 8
Antimicrobials	DEFA1B	728358	defensin alpha 1B
Antimicrobials	CCR10	2826	C-C motif chemokine receptor 10
Antimicrobials	CELA1	1990	chymotrypsin like elastase 1
Antimicrobials	DEFB106A	245909	defensin beta 106A
Antimicrobials	PENK	5179	proenkephalin
Antimicrobials	BPIFC	254240	BPI fold containing family C
Antimicrobials	MMP12	4321	matrix metallopeptidase 12
Antimicrobials	BPIFB6	128859	BPI fold containing family B member 6
Antimicrobials	LEAP2	116842	liver enriched antimicrobial peptide 2
Antimicrobials	SFTPD	6441	surfactant protein D
Antimicrobials	LCN9	392399	lipocalin 9
Antimicrobials	BPIFB2	80341	BPI fold containing family B member 2
Antimicrobials	PTGDS	5730	prostaglandin D2 synthase
Antimicrobials	TMSB4X	7114	thymosin beta 4 X-linked
Antimicrobials	PGLYRP1	8993	peptidoglycan recognition protein 1
Antimicrobials	ZC3HAV1	56829	zinc finger CCCH-type containing, antiviral 1
Antimicrobials	TMSB15A	11013	thymosin beta 15a
Antimicrobials	S100B	6285	S100 calcium binding protein B
Antimicrobials	S100A13	6284	S100 calcium binding protein A13
Antimicrobials	S100A6	6277	S100 calcium binding protein A6
Antimicrobials	DEFB119	245932	defensin beta 119
Antimicrobials	DEFB107A	245910	defensin beta 107A
Antimicrobials	DEFB105A	245908	defensin beta 105A
Antimicrobials	SERPIND1	3053	serpin family D member 1
Antimicrobials	DEFB129	140881	defensin beta 129
Antimicrobials	DEFB127	140850	defensin beta 127
Antimicrobials	S100P	6286	S100 calcium binding protein P
Antimicrobials	S100A7	6278	S100 calcium binding protein A7
Antimicrobials	DEFB104A	140596	defensin beta 104A
Antimicrobials	DEFB126	81623	defensin beta 126
Antimicrobials	DEFB106B	503841	defensin beta 106B
Antimicrobials	DEFB104B	503618	defensin beta 104B
Antimicrobials	DEFB107B	503614	defensin beta 107B
Antimicrobials	PGLYRP3	114771	peptidoglycan recognition protein 3
Antimicrobials	PGLYRP2	114770	peptidoglycan recognition protein 2
Antimicrobials	S100A10	6281	S100 calcium binding protein A10
Antimicrobials	S100A2	6273	S100 calcium binding protein A2
Antimicrobials	DEFB125	245938	defensin beta 125
Antimicrobials	DEFB123	245936	defensin beta 123
Antimicrobials	DEFB105B	504180	defensin beta 105B
Antimicrobials	DEFB132	400830	defensin beta 132
Antimicrobials	BPIFB3	359710	BPI fold containing family B member 3
Antimicrobials	LCN12	286256	lipocalin 12
Antimicrobials	PGLYRP4	57115	peptidoglycan recognition protein 4
Antimicrobials	S100A11	6282	S100 calcium binding protein A11
Antimicrobials	S100A5	6276	S100 calcium binding protein A5
Antimicrobials	S100A3	6274	S100 calcium binding protein A3
Antimicrobials	S100A1	6271	S100 calcium binding protein A1
Antimicrobials	DEFB128	245939	defensin beta 128
Antimicrobials	DEFB108B	245911	defensin beta 108B
Antimicrobials	HTN1	3346	histatin 1
Antimicrobials	LMBR1L	55716	limb development membrane protein 1 like
Antimicrobials	S100A7A	338324	S100 calcium binding protein A7A
Antimicrobials	DEFB118	117285	defensin beta 118
Antimicrobials	COLEC12	81035	collectin subfamily member 12
Antimicrobials	TMSB4Y	9087	thymosin beta 4 Y-linked
Antimicrobials	DEFB131A	644414	defensin beta 131A
Antimicrobials	DEFB134	613211	defensin beta 134
Antimicrobials	DEFB130A	245940	defensin beta 130A
Antimicrobials	DEFB124	245937	defensin beta 124
Antimicrobials	DEFB121	245934	defensin beta 121
Antimicrobials	DEFB116	245930	defensin beta 116
Antimicrobials	DEFB115	245929	defensin beta 115
Antimicrobials	DEFB114	245928	defensin beta 114
Antimicrobials	DEFB113	245927	defensin beta 113
Antimicrobials	DEFB112	245915	defensin beta 112
Antimicrobials	DEFB110	245913	defensin beta 110
Antimicrobials	TMSB15B	286527	thymosin beta 15B
Antimicrobials	DEFB133	403339	defensin beta 133
Antimicrobials	S100Z	170591	S100 calcium binding protein Z
Antimicrobials	MAVS	57506	mitochondrial antiviral signaling protein
Antimicrobials	TMSB4XP8	7117	TMSB4X pseudogene 8
Antimicrobials	S100A14	57402	S100 calcium binding protein A14
Antimicrobials	LCN10	414332	lipocalin 10
Antimicrobials	S100A16	140576	S100 calcium binding protein A16
Antimicrobials	DEFB136	613210	defensin beta 136
Antimicrobials	DEFB135	613209	defensin beta 135
Antimicrobials	DEFB117	245931	defensin beta 117 (pseudogene)
Antimicrobials	DEFB110	245913	defensin beta 110
Antimicrobials	ZC3HAV1L	92092	zinc finger CCCH-type containing, antiviral 1 like
Antimicrobials	S100A7L2	645922	S100 calcium binding protein A7 like 2
Antimicrobials	MBL3P	50639	mannose-binding lectin family member 3, pseudogene
Antimicrobials	DEFB4B	100289462	defensin beta 4B
Antimicrobials	BPIFB4	149954	BPI fold containing family B member 4
Antimicrobials	IFNAR1	3454	interferon alpha and beta receptor subunit 1
Antimicrobials	AZU1	566	azurocidin 1
Antimicrobials	DEFB131B	100129216	defensin beta 131B
Antimicrobials	DEFA1A3	613253	defensin alpha 1 and alpha 3, variable copy number locus
Antimicrobials	LCN1P1	286310	lipocalin 1 pseudogene 1
Antimicrobials	S100G	795	S100 calcium binding protein G
Antimicrobials	DEFA7P	724067	defensin alpha 7, pseudogene
Antimicrobials	DEFB130B	100133267	defensin beta 130B
Antimicrobials	DEFB108F	100133128	defensin beta 108F (pseudogene)
Antimicrobials	DEFB131C	100128174	defensin beta 131C (pseudogene)
Antimicrobials	TCHHL1	126637	trichohyalin like 1
Antimicrobials	TINAGL1	64129	tubulointerstitial nephritis antigen like 1
Antimicrobials	IFNGR1	3459	interferon gamma receptor 1
Antimicrobials	SLC22A17	51310	solute carrier family 22 member 17
Antimicrobials	WFIKKN1	117166	WAP, follistatin/kazal, immunoglobulin, kunitz and netrin domain containing 1
Antimicrobials	WFDC2	10406	WAP four-disulfide core domain 2
Antimicrobials	IL6	3569	interleukin 6
Antimicrobials	UMODL1	89766	uromodulin like 1
Antimicrobials	TGFB1	7040	transforming growth factor beta 1
Antimicrobials	PF4V1	5197	platelet factor 4 variant 1
Antimicrobials	MMP9	4318	matrix metallopeptidase 9
Antimicrobials	ANOS1	3730	anosmin 1
Antimicrobials	TLR4	7099	toll like receptor 4
Antimicrobials	IFNG	3458	interferon gamma
Antimicrobials	SPAG11B	10407	sperm associated antigen 11B
Antimicrobials	A2M	2	alpha-2-macroglobulin
Antimicrobials	CTSL	1514	cathepsin L
Antimicrobials	NFKB1	4790	nuclear factor kappa B subunit 1
Antimicrobials	APOBEC3G	60489	apolipoprotein B mRNA editing enzyme catalytic subunit 3G
Antimicrobials	FABP6	2172	fatty acid binding protein 6
Antimicrobials	NOD2	64127	nucleotide binding oligomerization domain containing 2
Antimicrobials	MBL2	4153	mannose binding lectin 2
Antimicrobials	SFTPA1	653509	surfactant protein A1
Antimicrobials	RBP1	5947	retinol binding protein 1
Antimicrobials	TLR2	7097	toll like receptor 2
Antimicrobials	SLC40A1	30061	solute carrier family 40 member 1
Antimicrobials	PLAU	5328	plasminogen activator, urokinase
Antimicrobials	IL1B	3553	interleukin 1 beta
Antimicrobials	PAEP	5047	progestagen associated endometrial protein
Antimicrobials	HJV	148738	hemojuvelin BMP co-receptor
Antimicrobials	MUC5AC	4586	mucin 5AC, oligomeric mucus/gel-forming
Antimicrobials	CTSS	1520	cathepsin S
Antimicrobials	OBP2A	29991	odorant binding protein 2A
Antimicrobials	PLTP	5360	phospholipid transfer protein
Antimicrobials	MX1	4599	MX dynamin like GTPase 1
Antimicrobials	DDX58	23586	DExD/H-box helicase 58
Antimicrobials	IFNL1	282618	interferon lambda 1
Antimicrobials	IRF3	3661	interferon regulatory factor 3
Antimicrobials	SFTPA2	729238	surfactant protein A2
Antimicrobials	LPA	4018	lipoprotein(a)
Antimicrobials	LBP	3929	lipopolysaccharide binding protein
Antimicrobials	RBP4	5950	retinol binding protein 4
Antimicrobials	SFTPA1	653509	surfactant protein A1
Antimicrobials	NOX4	50507	NADPH oxidase 4
Antimicrobials	LTF	4057	lactotransferrin
Antimicrobials	IFNB1	3456	interferon beta 1
Antimicrobials	RBP5	83758	retinol binding protein 5
Antimicrobials	FABP7	2173	fatty acid binding protein 7
Antimicrobials	FABP5	2171	fatty acid binding protein 5
Antimicrobials	FABP3	2170	fatty acid binding protein 3
Antimicrobials	FABP2	2169	fatty acid binding protein 2
Antimicrobials	FABP4	2167	fatty acid binding protein 4
Antimicrobials	R3HDML	140902	R3H domain containing like
Antimicrobials	BPIFA3	128861	BPI fold containing family A member 3
Antimicrobials	BPIFB1	92747	BPI fold containing family B member 1
Antimicrobials	OASL	8638	2'-5'-oligoadenylate synthetase like
Antimicrobials	CRABP2	1382	cellular retinoic acid binding protein 2
Antimicrobials	CRABP1	1381	cellular retinoic acid binding protein 1
Antimicrobials	RBP7	116362	retinol binding protein 7
Antimicrobials	DUOX1	53905	dual oxidase 1
Antimicrobials	OBP2B	29989	odorant binding protein 2B
Antimicrobials	RBP2	5948	retinol binding protein 2
Antimicrobials	LCN15	389812	lipocalin 15
Antimicrobials	CETP	1071	cholesteryl ester transfer protein
Antimicrobials	FABP12	646486	fatty acid binding protein 12
Antimicrobials	FABP9	646480	fatty acid binding protein 9
Antimicrobials	BPIFA1	51297	BPI fold containing family A member 1
Antimicrobials	LCNL1	401562	lipocalin like 1
Antimicrobials	C8G	733	complement C8 gamma chain
Antimicrobials	SPAG11A	653423	sperm associated antigen 11A
Antimicrobials	PI15	51050	peptidase inhibitor 15
Antimicrobials	NOX1	27035	NADPH oxidase 1
Antimicrobials	PMP2	5375	peripheral myelin protein 2
Antimicrobials	APOD	347	apolipoprotein D
Antimicrobials	ORM2	5005	orosomucoid 2
Antimicrobials	ORM1	5004	orosomucoid 1
Antimicrobials	TNF	7124	tumor necrosis factor
Antimicrobials	CTSG	1511	cathepsin G
Antimicrobials	PRTN3	5657	proteinase 3
Antimicrobials	MAPK1	5594	mitogen-activated protein kinase 1
Antimicrobials	PML	5371	PML nuclear body scaffold
Antimicrobials	AEN	64782	apoptosis enhancing nuclease
Antimicrobials	CYBB	1536	cytochrome b-245 beta chain
Antimicrobials	BPIFA2	140683	BPI fold containing family A member 2
Antimicrobials	ISG20	3669	interferon stimulated exonuclease gene 20
Antimicrobials	BCL3	602	BCL3 transcription coactivator
Antimicrobials	ISG20L2	81875	interferon stimulated exonuclease gene 20 like 2
Antimicrobials	NOX5	79400	NADPH oxidase 5
Antimicrobials	NOX3	50508	NADPH oxidase 3
Antimicrobials	DUOX2	50506	dual oxidase 2
Antimicrobials	TLR3	7098	toll like receptor 3
Antimicrobials	TFRC	7037	transferrin receptor
Antimicrobials	IFIH1	64135	interferon induced with helicase C domain 1
Antimicrobials	LRP1	4035	LDL receptor related protein 1
Antimicrobials	TRIM5	85363	tripartite motif containing 5
Antimicrobials	IDO1	3620	indoleamine 2,3-dioxygenase 1
Antimicrobials	GDF15	9518	growth differentiation factor 15
Antimicrobials	NEDD4	4734	NEDD4 E3 ubiquitin protein ligase
Antimicrobials	ADIPOQ	9370	adiponectin, C1Q and collagen domain containing
Antimicrobials	STAT3	6774	signal transducer and activator of transcription 3
Antimicrobials	STAT1	6772	signal transducer and activator of transcription 1
Antimicrobials	IFNL2	282616	interferon lambda 2
Antimicrobials	SOCS3	9021	suppressor of cytokine signaling 3
Antimicrobials	SEMG1	6406	semenogelin 1
Antimicrobials	TNFSF10	8743	TNF superfamily member 10
Antimicrobials	CCL20	6364	C-C motif chemokine ligand 20
Antimicrobials	SOCS1	8651	suppressor of cytokine signaling 1
Antimicrobials	RNASEL	6041	ribonuclease L
Antimicrobials	IRF1	3659	interferon regulatory factor 1
Antimicrobials	IL15	3600	interleukin 15
Antimicrobials	APOBEC3F	200316	apolipoprotein B mRNA editing enzyme catalytic subunit 3F
Antimicrobials	PLAAT4	5920	phospholipase A and acyltransferase 4
Antimicrobials	CHIT1	1118	chitinase 1
Antimicrobials	IFNA1	3439	interferon alpha 1
Antimicrobials	CD40	958	CD40 molecule
Antimicrobials	TLR7	51284	toll like receptor 7
Antimicrobials	PPIA	5478	peptidylprolyl isomerase A
Antimicrobials	HFE	3077	homeostatic iron regulator
Antimicrobials	ZYX	7791	zyxin
Antimicrobials	NLRX1	79671	NLR family member X1
Antimicrobials	PGC	5225	progastricsin
Antimicrobials	VEGFA	7422	vascular endothelial growth factor A
Antimicrobials	IKBKE	9641	inhibitor of nuclear factor kappa B kinase subunit epsilon
Antimicrobials	ISG15	9636	ISG15 ubiquitin like modifier
Antimicrobials	DHX58	79132	DExH-box helicase 58
Antimicrobials	TNFAIP3	7128	TNF alpha induced protein 3
Antimicrobials	TFR2	7036	transferrin receptor 2
Antimicrobials	FCN2	2220	ficolin 2
Antimicrobials	MUC4	4585	mucin 4, cell surface associated
Antimicrobials	F2R	2149	coagulation factor II thrombin receptor
Antimicrobials	ELN	2006	elastin
Antimicrobials	IL27	246778	interleukin 27
Antimicrobials	MAPT	4137	microtubule associated protein tau
Antimicrobials	LYZ	4069	lysozyme
Antimicrobials	CCL5	6352	C-C motif chemokine ligand 5
Antimicrobials	LEP	3952	leptin
Antimicrobials	CYLD	1540	CYLD lysine 63 deubiquitinase
Antimicrobials	KLKB1	3818	kallikrein B1
Antimicrobials	CST4	1472	cystatin S
Antimicrobials	CSRP1	1465	cysteine and glycine rich protein 1
Antimicrobials	MAPK14	1432	mitogen-activated protein kinase 14
Antimicrobials	JUN	3725	Jun proto-oncogene, AP-1 transcription factor subunit
Antimicrobials	ITGAV	3685	integrin subunit alpha V
Antimicrobials	IRF5	3663	interferon regulatory factor 5
Antimicrobials	CCR6	1235	C-C motif chemokine receptor 6
Antimicrobials	IL12B	3593	interleukin 12B
Antimicrobials	TLR8	51311	toll like receptor 8
Antimicrobials	GNLY	10578	granulysin
Antimicrobials	CD81	975	CD81 molecule
Antimicrobials	EIF2AK2	5610	eukaryotic translation initiation factor 2 alpha kinase 2
Antimicrobials	APOM	55937	apolipoprotein M
Antimicrobials	CACYBP	27101	calcyclin binding protein
Antimicrobials	NOD1	10392	nucleotide binding oligomerization domain containing 1
Antimicrobials	MAPK8	5599	mitogen-activated protein kinase 8
Antimicrobials	MAPK3	5595	mitogen-activated protein kinase 3
Antimicrobials	BST2	684	bone marrow stromal cell antigen 2
Antimicrobials	BPHL	670	biphenyl hydrolase like
Antimicrobials	PLA2G2A	5320	phospholipase A2 group IIA
Antimicrobials	GRN	2896	granulin precursor
Antimicrobials	NEWENTRY	192343	-
Antimicrobials	PDGFRA	5156	platelet derived growth factor receptor alpha
Antimicrobials	GNAI1	2770	G protein subunit alpha i1
Antimicrobials	WNT5A	7474	Wnt family member 5A
Antimicrobials	FURIN	5045	furin, paired basic amino acid cleaving enzyme
Antimicrobials	ADAR	103	adenosine deaminase RNA specific
Antimicrobials	TYK2	7297	tyrosine kinase 2
Antimicrobials	NOS2	4843	nitric oxide synthase 2
Antimicrobials	TRAF3	7187	TNF receptor associated factor 3
Antimicrobials	TPT1	7178	tumor protein, translationally-controlled 1
Antimicrobials	TPM2	7169	tropomyosin 2
Antimicrobials	NEO1	4756	neogenin 1
Antimicrobials	AHNAK	79026	AHNAK nucleoprotein
Antimicrobials	TLR1	7096	toll like receptor 1
Antimicrobials	TK2	7084	thymidine kinase 2
Antimicrobials	PRDX2	7001	peroxiredoxin 2
Antimicrobials	MX2	4600	MX dynamin like GTPase 2
Antimicrobials	FGF2	2247	fibroblast growth factor 2
Antimicrobials	FGA	2243	fibrinogen alpha chain
Antimicrobials	TCF7L2	6934	transcription factor 7 like 2
Antimicrobials	F2RL1	2150	F2R like trypsin receptor 1
Antimicrobials	TKFC	26007	triokinase and FMN cyclase
Antimicrobials	MSR1	4481	macrophage scavenger receptor 1
Antimicrobials	NFKBIZ	64332	NFKB inhibitor zeta
Antimicrobials	LMBR1	64327	limb development membrane protein 1
Antimicrobials	EPPIN	57119	epididymal peptidase inhibitor
Antimicrobials	SRC	6714	SRC proto-oncogene, non-receptor tyrosine kinase
Antimicrobials	MPO	4353	myeloperoxidase
Antimicrobials	ELAVL1	1994	ELAV like RNA binding protein 1
Antimicrobials	ROBO3	64221	roundabout guidance receptor 3
Antimicrobials	SP1	6667	Sp1 transcription factor
Antimicrobials	SOD1	6647	superoxide dismutase 1
Antimicrobials	PDF	64146	peptide deformylase, mitochondrial
Antimicrobials	DLL4	54567	delta like canonical Notch ligand 4
Antimicrobials	ECD	11319	ecdysoneless cell cycle regulator
Antimicrobials	SLC11A1	6556	solute carrier family 11 member 1
Antimicrobials	DMBT1	1755	deleted in malignant brain tumors 1
Antimicrobials	STING1	340061	stimulator of interferon response cGAMP interactor 1
Antimicrobials	SKIV2L	6499	Ski2 like RNA helicase
Antimicrobials	SEMG2	6407	semenogelin 2
Antimicrobials	LTA	4049	lymphotoxin alpha
Antimicrobials	DES	1674	desmin
Antimicrobials	DCK	1633	deoxycytidine kinase
Antimicrobials	DAXX	1616	death domain associated protein
Antimicrobials	TNFRSF10A	8797	TNF receptor superfamily member 10a
Antimicrobials	TNFRSF10B	8795	TNF receptor superfamily member 10b
Antimicrobials	EED	8726	embryonic ectoderm development
Antimicrobials	CCL4	6351	C-C motif chemokine ligand 4
Antimicrobials	LIMS1	3987	LIM zinc finger domain containing 1
Antimicrobials	LALBA	3906	lactalbumin alpha
Antimicrobials	APOBEC3H	164668	apolipoprotein B mRNA editing enzyme catalytic subunit 3H
Antimicrobials	TMPRSS6	164656	transmembrane serine protease 6
Antimicrobials	SPINK5	11005	serine peptidase inhibitor Kazal type 5
Antimicrobials	MARCO	8685	macrophage receptor with collagenous structure
Antimicrobials	BECN1	8678	beclin 1
Antimicrobials	TNFSF11	8600	TNF superfamily member 11
Antimicrobials	KNG1	3827	kininogen 1
Antimicrobials	CSK	1445	C-terminal Src kinase
Antimicrobials	KLRK1	22914	killer cell lectin like receptor K1
Antimicrobials	KCNH2	3757	potassium voltage-gated channel subfamily H member 2
Antimicrobials	JUND	3727	JunD proto-oncogene, AP-1 transcription factor subunit
Antimicrobials	JAK1	3716	Janus kinase 1
Antimicrobials	CREB1	1385	cAMP responsive element binding protein 1
Antimicrobials	CLDN4	1364	claudin 4
Antimicrobials	CCL28	56477	C-C motif chemokine ligand 28
Antimicrobials	RNASE3	6037	ribonuclease A family member 3
Antimicrobials	RN7SL1	6029	RNA component of signal recognition particle 7SL1
Antimicrobials	IRF7	3665	interferon regulatory factor 7
Antimicrobials	IREB2	3658	iron responsive element binding protein 2
Antimicrobials	ILK	3611	integrin linked kinase
Antimicrobials	IL18	3606	interleukin 18
Antimicrobials	IL17A	3605	interleukin 17A
Antimicrobials	LTB4R	1241	leukotriene B4 receptor
Antimicrobials	APOBEC3A	200315	apolipoprotein B mRNA editing enzyme catalytic subunit 3A
Antimicrobials	MASP2	10747	mannan binding lectin serine peptidase 2
Antimicrobials	TRIM27	5987	tripartite motif containing 27
Antimicrobials	RELA	5970	RELA proto-oncogene, NF-kB subunit
Antimicrobials	IL7R	3575	interleukin 7 receptor
Antimicrobials	IL1A	3552	interleukin 1 alpha
Antimicrobials	PTX3	5806	pentraxin 3
Antimicrobials	IFNAR2	3455	interferon alpha and beta receptor subunit 2
Antimicrobials	IFN1@	3438	-
Antimicrobials	SYTL1	84958	synaptotagmin like 1
Antimicrobials	APOBEC3C	27350	apolipoprotein B mRNA editing enzyme catalytic subunit 3C
Antimicrobials	DDX17	10521	DEAD-box helicase 17
Antimicrobials	PTGS2	5743	prostaglandin-endoperoxide synthase 2
Antimicrobials	HTR1A	3350	5-hydroxytryptamine receptor 1A
Antimicrobials	SEPTIN7	989	septin 7
Antimicrobials	CD40LG	959	CD40 ligand
Antimicrobials	CD14	929	CD14 molecule
Antimicrobials	CD8A	925	CD8a molecule
Antimicrobials	CD4	920	CD4 molecule
Antimicrobials	MASP1	5648	mannan binding lectin serine peptidase 1
Antimicrobials	PROC	5624	protein C, inactivator of coagulation factors Va and VIIIa
Antimicrobials	MAP2K2	5605	mitogen-activated protein kinase kinase 2
Antimicrobials	MAP2K1	5604	mitogen-activated protein kinase kinase 1
Antimicrobials	HRG	3273	histidine rich glycoprotein
Antimicrobials	NDRG1	10397	N-myc downstream regulated 1
Antimicrobials	IRF9	10379	interferon regulatory factor 9
Antimicrobials	TRIM22	10346	tripartite motif containing 22
Antimicrobials	LANCL1	10314	LanC like 1
Antimicrobials	PPP4C	5531	protein phosphatase 4 catalytic subunit
Antimicrobials	HMOX1	3162	heme oxygenase 1
Antimicrobials	HMGB1	3146	high mobility group box 1
Antimicrobials	HLA-B	3106	major histocompatibility complex, class I, B
Antimicrobials	RNASE7	84659	ribonuclease A family member 7
Antimicrobials	ABCC4	10257	ATP binding cassette subfamily C member 4
Antimicrobials	HGF	3082	hepatocyte growth factor
Antimicrobials	HDAC1	3065	histone deacetylase 1
Antimicrobials	IFNLR1	163702	interferon lambda receptor 1
Antimicrobials	PLSCR1	5359	phospholipid scramblase 1
Antimicrobials	B2M	567	beta-2-microglobulin
Antimicrobials	BACH2	60468	BTB domain and CNC homolog 2
Antimicrobials	TANK	10010	TRAF family member associated NFKB activator
Antimicrobials	PIK3CG	5294	phosphatidylinositol-4,5-bisphosphate 3-kinase catalytic subunit gamma
Antimicrobials	ARRB1	408	arrestin beta 1
Antimicrobials	RSAD2	91543	radical S-adenosyl methionine domain containing 2
Antimicrobials	STAB2	55576	stabilin 2
Antimicrobials	TBK1	29110	TANK binding kinase 1
Antimicrobials	PDYN	5173	prodynorphin
Antimicrobials	PDGFRB	5159	platelet derived growth factor receptor beta
Antimicrobials	PDCD1	5133	programmed cell death 1
Antimicrobials	PCSK2	5126	proprotein convertase subtilisin/kexin type 2
Antimicrobials	PCSK1	5122	proprotein convertase subtilisin/kexin type 1
Antimicrobials	ARG2	384	arginase 2
Antimicrobials	AQP9	366	aquaporin 9
Antimicrobials	FASLG	356	Fas ligand
Antimicrobials	APOH	350	apolipoprotein H
Antimicrobials	BIRC5	332	baculoviral IAP repeat containing 5
Antimicrobials	ANXA6	309	annexin A6
Antimicrobials	IL22	50616	interleukin 22
Antimicrobials	VTN	7448	vitronectin
Antimicrobials	VIM	7431	vimentin
Antimicrobials	VCAM1	7412	vascular cell adhesion molecule 1
Antimicrobials	PRDX1	5052	peroxiredoxin 1
Antimicrobials	GFAP	2670	glial fibrillary acidic protein
Antimicrobials	GBP2	2634	guanylate binding protein 2
Antimicrobials	ALB	213	albumin
Antimicrobials	SLC29A3	55315	solute carrier family 29 member 3
Antimicrobials	OAS1	4938	2'-5'-oligoadenylate synthetase 1
Antimicrobials	AGER	177	advanced glycosylation end-product specific receptor
Antimicrobials	UNC93B1	81622	unc-93 homolog B1, TLR signaling regulator
Antimicrobials	TNFSF4	7292	TNF superfamily member 4
Antimicrobials	NOS1	4842	nitric oxide synthase 1
Antimicrobials	ACTG1	71	actin gamma 1
Antimicrobials	ACTA1	58	actin alpha 1, skeletal muscle
Antimicrobials	ACO1	48	aconitase 1
Antimicrobials	SERPINA3	12	serpin family A member 3
Antimicrobials	CXCR1	3577	C-X-C motif chemokine receptor 1
Antimicrobials	CCL15	6359	C-C motif chemokine ligand 15
Antimicrobials	CCL14	6358	C-C motif chemokine ligand 14
Antimicrobials	CCL4	6351	C-C motif chemokine ligand 4
Antimicrobials	CCL16	6360	C-C motif chemokine ligand 16
Antimicrobials	CCL19	6363	C-C motif chemokine ligand 19
Antimicrobials	CCL13	6357	C-C motif chemokine ligand 13
Antimicrobials	CCL18	6362	C-C motif chemokine ligand 18
Antimicrobials	CCL17	6361	C-C motif chemokine ligand 17
Antimicrobials	CCL26	10344	C-C motif chemokine ligand 26
Antimicrobials	CCL22	6367	C-C motif chemokine ligand 22
Antimicrobials	CCR3	1232	C-C motif chemokine receptor 3
Antimicrobials	CCL28	56477	C-C motif chemokine ligand 28
Antimicrobials	CCL4L1	388372	C-C motif chemokine ligand 4 like 1
Antimicrobials	ACKR2	1238	atypical chemokine receptor 2
Antimicrobials	CCR7	1236	C-C motif chemokine receptor 7
Antimicrobials	CCL27	10850	C-C motif chemokine ligand 27
Antimicrobials	CCR8	1237	C-C motif chemokine receptor 8
Antimicrobials	ACKR4	51554	atypical chemokine receptor 4
Antimicrobials	CCR10	2826	C-C motif chemokine receptor 10
Antimicrobials	CCL2	6347	C-C motif chemokine ligand 2
Antimicrobials	CCL21	6366	C-C motif chemokine ligand 21
Antimicrobials	CCL7	6354	C-C motif chemokine ligand 7
Antimicrobials	CCL5	6352	C-C motif chemokine ligand 5
Antimicrobials	CCL3	6348	C-C motif chemokine ligand 3
Antimicrobials	CCL20	6364	C-C motif chemokine ligand 20
Antimicrobials	CCL11	6356	C-C motif chemokine ligand 11
Antimicrobials	CCR5	1234	C-C motif chemokine receptor 5
Antimicrobials	CCL23	6368	C-C motif chemokine ligand 23
Antimicrobials	CCL25	6370	C-C motif chemokine ligand 25
Antimicrobials	CCL1	6346	C-C motif chemokine ligand 1
Antimicrobials	CCL3L3	414062	C-C motif chemokine ligand 3 like 3
Antimicrobials	CCL4L2	9560	C-C motif chemokine ligand 4 like 2
Antimicrobials	CXCL12	6387	C-X-C motif chemokine ligand 12
Antimicrobials	XCL1	6375	X-C motif chemokine ligand 1
Antimicrobials	CCL8	6355	C-C motif chemokine ligand 8
Antimicrobials	CCL3L1	6349	C-C motif chemokine ligand 3 like 1
Antimicrobials	CCR1	1230	C-C motif chemokine receptor 1
Antimicrobials	CCL24	6369	C-C motif chemokine ligand 24
Antimicrobials	XCL2	6846	X-C motif chemokine ligand 2
Antimicrobials	CXCL1	2919	C-X-C motif chemokine ligand 1
Antimicrobials	CXCL10	3627	C-X-C motif chemokine ligand 10
Antimicrobials	CXCR4	7852	C-X-C motif chemokine receptor 4
Antimicrobials	CXCL2	2920	C-X-C motif chemokine ligand 2
Antimicrobials	CXCR6	10663	C-X-C motif chemokine receptor 6
Antimicrobials	CCR4	1233	C-C motif chemokine receptor 4
Antimicrobials	CXCL11	6373	C-X-C motif chemokine ligand 11
Antimicrobials	TAFA5	25817	TAFA chemokine like family member 5
Antimicrobials	TAFA3	284467	TAFA chemokine like family member 3
Antimicrobials	TAFA4	151647	TAFA chemokine like family member 4
Antimicrobials	TAFA1	407738	TAFA chemokine like family member 1
Antimicrobials	TAFA2	338811	TAFA chemokine like family member 2
Antimicrobials	CCL15-CCL14	348249	CCL15-CCL14 readthrough (NMD candidate)
Antimicrobials	IL6	3569	interleukin 6
Antimicrobials	TNF	7124	tumor necrosis factor
Antimicrobials	IL1B	3553	interleukin 1 beta
Antimicrobials	IL18	3606	interleukin 18
Antimicrobials	PTK2B	2185	protein tyrosine kinase 2 beta
Antimicrobials	VEGFA	7422	vascular endothelial growth factor A
Antimicrobials	IL4	3565	interleukin 4
Antimicrobials	CDH1	999	cadherin 1
Antimicrobials	CD40	958	CD40 molecule
Antimicrobials	DEFB103B	55894	defensin beta 103B
Antimicrobials	F2RL1	2150	F2R like trypsin receptor 1
Antimicrobials	MMP9	4318	matrix metallopeptidase 9
Antimicrobials	LTBP1	4052	latent transforming growth factor beta binding protein 1
Antimicrobials	DEFB4A	1673	defensin beta 4A
Antimicrobials	TNFSF10	8743	TNF superfamily member 10
Antimicrobials	IL13	3596	interleukin 13
Antimicrobials	IL10	3586	interleukin 10
Antimicrobials	IL2	3558	interleukin 2
Antimicrobials	PPARG	5468	peroxisome proliferator activated receptor gamma
Antimicrobials	FGR	2268	FGR proto-oncogene, Src family tyrosine kinase
Antimicrobials	MIF	4282	macrophage migration inhibitory factor
Antimicrobials	CRP	1401	C-reactive protein
Antimicrobials	JAK2	3717	Janus kinase 2
Antimicrobials	IL1A	3552	interleukin 1 alpha
Antimicrobials	PTK2	5747	protein tyrosine kinase 2
Antimicrobials	PTGDR	5729	prostaglandin D2 receptor
Antimicrobials	CD86	942	CD86 molecule
Antimicrobials	HCK	3055	HCK proto-oncogene, Src family tyrosine kinase
Antimicrobials	ARRB1	408	arrestin beta 1
Antimicrobials	GNAI1	2770	G protein subunit alpha i1
Antimicrobials	VDR	7421	vitamin D receptor
Antimicrobials	OLR1	4973	oxidized low density lipoprotein receptor 1
Antimicrobials	GRK2	156	G protein-coupled receptor kinase 2
Antimicrobials	TXK	7294	TXK tyrosine kinase
Antimicrobials	RNASE2	6036	ribonuclease A family member 2
BCRSignalingPathway	CD79A	973	CD79a molecule
BCRSignalingPathway	CD79B	974	CD79b molecule
BCRSignalingPathway	LYN	4067	LYN proto-oncogene, Src family tyrosine kinase
BCRSignalingPathway	SYK	6850	spleen associated tyrosine kinase
BCRSignalingPathway	BTK	695	Bruton tyrosine kinase
BCRSignalingPathway	BLNK	29760	B cell linker
BCRSignalingPathway	VAV3	10451	vav guanine nucleotide exchange factor 3
BCRSignalingPathway	VAV1	7409	vav guanine nucleotide exchange factor 1
BCRSignalingPathway	VAV2	7410	vav guanine nucleotide exchange factor 2
BCRSignalingPathway	RAC1	5879	Rac family small GTPase 1
BCRSignalingPathway	RAC2	5880	Rac family small GTPase 2
BCRSignalingPathway	RAC3	5881	Rac family small GTPase 3
BCRSignalingPathway	PPP3CA	5530	protein phosphatase 3 catalytic subunit alpha
BCRSignalingPathway	PPP3CB	5532	protein phosphatase 3 catalytic subunit beta
BCRSignalingPathway	PPP3CC	5533	protein phosphatase 3 catalytic subunit gamma
BCRSignalingPathway	CHP1	11261	calcineurin like EF-hand protein 1
BCRSignalingPathway	PPP3R1	5534	protein phosphatase 3 regulatory subunit B, alpha
BCRSignalingPathway	PPP3R2	5535	protein phosphatase 3 regulatory subunit B, beta
BCRSignalingPathway	CHP2	63928	calcineurin like EF-hand protein 2
BCRSignalingPathway	NFAT5	10725	nuclear factor of activated T cells 5
BCRSignalingPathway	NFATC1	4772	nuclear factor of activated T cells 1
BCRSignalingPathway	NFATC2	4773	nuclear factor of activated T cells 2
BCRSignalingPathway	NFATC3	4775	nuclear factor of activated T cells 3
BCRSignalingPathway	NFATC4	4776	nuclear factor of activated T cells 4
BCRSignalingPathway	HRAS	3265	HRas proto-oncogene, GTPase
BCRSignalingPathway	KRAS	3845	KRAS proto-oncogene, GTPase
BCRSignalingPathway	NRAS	4893	NRAS proto-oncogene, GTPase
BCRSignalingPathway	FOS	2353	Fos proto-oncogene, AP-1 transcription factor subunit
BCRSignalingPathway	JUN	3725	Jun proto-oncogene, AP-1 transcription factor subunit
BCRSignalingPathway	CARD11	84433	caspase recruitment domain family member 11
BCRSignalingPathway	BCL10	8915	BCL10 immune signaling adaptor
BCRSignalingPathway	MALT1	10892	MALT1 paracaspase
BCRSignalingPathway	CHUK	1147	component of inhibitor of nuclear factor kappa B kinase complex
BCRSignalingPathway	IKBKB	3551	inhibitor of nuclear factor kappa B kinase subunit beta
BCRSignalingPathway	IKBKG	8517	inhibitor of nuclear factor kappa B kinase regulatory subunit gamma
BCRSignalingPathway	NFKB1	4790	nuclear factor kappa B subunit 1
BCRSignalingPathway	RELA	5970	RELA proto-oncogene, NF-kB subunit
BCRSignalingPathway	NFKBIA	4792	NFKB inhibitor alpha
BCRSignalingPathway	NFKBIB	4793	NFKB inhibitor beta
BCRSignalingPathway	NFKBIE	4794	NFKB inhibitor epsilon
BCRSignalingPathway	CD81	975	CD81 molecule
BCRSignalingPathway	CD19	930	CD19 molecule
BCRSignalingPathway	CR2	1380	complement C3d receptor 2
BCRSignalingPathway	PIK3R5	23533	phosphoinositide-3-kinase regulatory subunit 5
BCRSignalingPathway	PIK3R1	5295	phosphoinositide-3-kinase regulatory subunit 1
BCRSignalingPathway	PIK3R2	5296	phosphoinositide-3-kinase regulatory subunit 2
BCRSignalingPathway	PIK3R3	8503	phosphoinositide-3-kinase regulatory subunit 3
BCRSignalingPathway	PIK3CA	5290	phosphatidylinositol-4,5-bisphosphate 3-kinase catalytic subunit alpha
BCRSignalingPathway	PIK3CB	5291	phosphatidylinositol-4,5-bisphosphate 3-kinase catalytic subunit beta
BCRSignalingPathway	PIK3CD	5293	phosphatidylinositol-4,5-bisphosphate 3-kinase catalytic subunit delta
BCRSignalingPathway	PIK3CG	5294	phosphatidylinositol-4,5-bisphosphate 3-kinase catalytic subunit gamma
BCRSignalingPathway	AKT3	10000	AKT serine/threonine kinase 3
BCRSignalingPathway	AKT1	207	AKT serine/threonine kinase 1
BCRSignalingPathway	AKT2	208	AKT serine/threonine kinase 2
BCRSignalingPathway	GSK3B	2932	glycogen synthase kinase 3 beta
BCRSignalingPathway	INPP5D	3635	inositol polyphosphate-5-phosphatase D
BCRSignalingPathway	CD22	933	CD22 molecule
BCRSignalingPathway	CD72	971	CD72 molecule
BCRSignalingPathway	PTPN6	5777	protein tyrosine phosphatase non-receptor type 6
BCRSignalingPathway	LILRB3	11025	leukocyte immunoglobulin like receptor B3
BCRSignalingPathway	FCGR2B	2213	Fc fragment of IgG receptor IIb
BCRSignalingPathway	RASGRP3	25780	RAS guanyl releasing protein 3
BCRSignalingPathway	PLCG2	5336	phospholipase C gamma 2
BCRSignalingPathway	PRKCB	5579	protein kinase C beta
BCRSignalingPathway	IFITM1	8519	interferon induced transmembrane protein 1
BCRSignalingPathway	IGH	3492	immunoglobulin heavy locus
BCRSignalingPathway	IGHA1	3493	immunoglobulin heavy constant alpha 1
BCRSignalingPathway	IGHA2	3494	immunoglobulin heavy constant alpha 2 (A2m marker)
BCRSignalingPathway	IGHD	3495	immunoglobulin heavy constant delta
BCRSignalingPathway	IGHD1-1	28510	immunoglobulin heavy diversity 1-1
BCRSignalingPathway	IGHD1-14	28508	immunoglobulin heavy diversity 1-14 (non-functional)
BCRSignalingPathway	IGHD1-20	28507	immunoglobulin heavy diversity 1-20
BCRSignalingPathway	IGHD1-26	28506	immunoglobulin heavy diversity 1-26
BCRSignalingPathway	IGHD1-7	28509	immunoglobulin heavy diversity 1-7
BCRSignalingPathway	IGHD2-15	28503	immunoglobulin heavy diversity 2-15
BCRSignalingPathway	IGHD2-2	28505	immunoglobulin heavy diversity 2-2
BCRSignalingPathway	IGHD2-21	28502	immunoglobulin heavy diversity 2-21
BCRSignalingPathway	IGHD2-8	28504	immunoglobulin heavy diversity 2-8
BCRSignalingPathway	IGHD3-10	28499	immunoglobulin heavy diversity 3-10
BCRSignalingPathway	IGHD3-16	28498	immunoglobulin heavy diversity 3-16
BCRSignalingPathway	IGHD3-22	28497	immunoglobulin heavy diversity 3-22
BCRSignalingPathway	IGHD3-3	28501	immunoglobulin heavy diversity 3-3
BCRSignalingPathway	IGHD3-9	28500	immunoglobulin heavy diversity 3-9
BCRSignalingPathway	IGHD4-11	28495	immunoglobulin heavy diversity 4-11 (non-functional)
BCRSignalingPathway	IGHD4-17	28494	immunoglobulin heavy diversity 4-17
BCRSignalingPathway	IGHD4-23	28493	immunoglobulin heavy diversity 4-23 (non-functional)
BCRSignalingPathway	IGHD4-4	28496	immunoglobulin heavy diversity 4-4
BCRSignalingPathway	IGHD5-12	28491	immunoglobulin heavy diversity 5-12
BCRSignalingPathway	IGHD5-18	28490	immunoglobulin heavy diversity 5-18
BCRSignalingPathway	IGHD5-24	28489	immunoglobulin heavy diversity 5-24 (non-functional)
BCRSignalingPathway	IGHD5-5	28492	immunoglobulin heavy diversity 5-5
BCRSignalingPathway	IGHD6-13	28487	immunoglobulin heavy diversity 6-13
BCRSignalingPathway	IGHD6-19	28486	immunoglobulin heavy diversity 6-19
BCRSignalingPathway	IGHD6-25	28485	immunoglobulin heavy diversity 6-25
BCRSignalingPathway	IGHD6-6	28488	immunoglobulin heavy diversity 6-6
BCRSignalingPathway	IGHD7-27	28484	immunoglobulin heavy diversity 7-27
BCRSignalingPathway	IGHE	3497	immunoglobulin heavy constant epsilon
BCRSignalingPathway	IGHG1	3500	immunoglobulin heavy constant gamma 1 (G1m marker)
BCRSignalingPathway	IGHG2	3501	immunoglobulin heavy constant gamma 2 (G2m marker)
BCRSignalingPathway	IGHG3	3502	immunoglobulin heavy constant gamma 3 (G3m marker)
BCRSignalingPathway	IGHG4	3503	immunoglobulin heavy constant gamma 4 (G4m marker)
BCRSignalingPathway	IGHJ1	28483	immunoglobulin heavy joining 1
BCRSignalingPathway	IGHJ2	28481	immunoglobulin heavy joining 2
BCRSignalingPathway	IGHJ3	28479	immunoglobulin heavy joining 3
BCRSignalingPathway	IGHJ4	28477	immunoglobulin heavy joining 4
BCRSignalingPathway	IGHJ5	28476	immunoglobulin heavy joining 5
BCRSignalingPathway	IGHJ6	28475	immunoglobulin heavy joining 6
BCRSignalingPathway	IGHM	3507	immunoglobulin heavy constant mu
BCRSignalingPathway	IGH	3492	immunoglobulin heavy locus
BCRSignalingPathway	IGHV1-18	28468	immunoglobulin heavy variable 1-18
BCRSignalingPathway	IGHV1-2	28474	immunoglobulin heavy variable 1-2
BCRSignalingPathway	IGHV1-24	28467	immunoglobulin heavy variable 1-24
BCRSignalingPathway	IGHV1-3	28473	immunoglobulin heavy variable 1-3
BCRSignalingPathway	IGHV1-45	28466	immunoglobulin heavy variable 1-45
BCRSignalingPathway	IGHV1-46	28465	immunoglobulin heavy variable 1-46
BCRSignalingPathway	IGHV1-58	28464	immunoglobulin heavy variable 1-58
BCRSignalingPathway	IGHV1-69	28461	immunoglobulin heavy variable 1-69
BCRSignalingPathway	IGHV1-8	28472	immunoglobulin heavy variable 1-8
BCRSignalingPathway	IGHV1-38-4	28460	immunoglobulin heavy variable 1-38-4 (non-functional)
BCRSignalingPathway	IGHV1-69-2	28458	immunoglobulin heavy variable 1-69-2
BCRSignalingPathway	IGHV2-26	28455	immunoglobulin heavy variable 2-26
BCRSignalingPathway	IGHV2-5	28457	immunoglobulin heavy variable 2-5
BCRSignalingPathway	IGHV2-70	28454	immunoglobulin heavy variable 2-70
BCRSignalingPathway	IGHV3-11	28450	immunoglobulin heavy variable 3-11
BCRSignalingPathway	IGHV3-13	28449	immunoglobulin heavy variable 3-13
BCRSignalingPathway	IGHV3-15	28448	immunoglobulin heavy variable 3-15
BCRSignalingPathway	IGHV3-16	28447	immunoglobulin heavy variable 3-16 (non-functional)
BCRSignalingPathway	IGHV3-20	28445	immunoglobulin heavy variable 3-20
BCRSignalingPathway	IGHV3-21	28444	immunoglobulin heavy variable 3-21
BCRSignalingPathway	IGHV3-23	28442	immunoglobulin heavy variable 3-23
BCRSignalingPathway	IGHV3-30	28439	immunoglobulin heavy variable 3-30
BCRSignalingPathway	IGHV3-30-3	57290	immunoglobulin heavy variable 3-30-3
BCRSignalingPathway	IGHV3-30-5	89770	immunoglobulin heavy variable 3-30-5
BCRSignalingPathway	IGHV3-33	28434	immunoglobulin heavy variable 3-33
BCRSignalingPathway	IGHV3-35	28432	immunoglobulin heavy variable 3-35 (non-functional)
BCRSignalingPathway	IGHV3-38	28429	immunoglobulin heavy variable 3-38 (non-functional)
BCRSignalingPathway	IGHV3-43	28426	immunoglobulin heavy variable 3-43
BCRSignalingPathway	IGHV3-48	28424	immunoglobulin heavy variable 3-48
BCRSignalingPathway	IGHV3-49	28423	immunoglobulin heavy variable 3-49
BCRSignalingPathway	IGHV3-53	28420	immunoglobulin heavy variable 3-53
BCRSignalingPathway	IGHV3-64	28414	immunoglobulin heavy variable 3-64
BCRSignalingPathway	IGHV3-66	28412	immunoglobulin heavy variable 3-66
BCRSignalingPathway	IGHV3-7	28452	immunoglobulin heavy variable 3-7
BCRSignalingPathway	IGHV3-72	28410	immunoglobulin heavy variable 3-72
BCRSignalingPathway	IGHV3-73	28409	immunoglobulin heavy variable 3-73
BCRSignalingPathway	IGHV3-74	28408	immunoglobulin heavy variable 3-74
BCRSignalingPathway	IGHV3-9	28451	immunoglobulin heavy variable 3-9
BCRSignalingPathway	IGHV3-38-3	28404	immunoglobulin heavy variable 3-38-3 (non-functional)
BCRSignalingPathway	IGHV3-69-1	28402	immunoglobulin heavy variable 3-69-1 (pseudogene)
BCRSignalingPathway	IGHV4-28	28400	immunoglobulin heavy variable 4-28
BCRSignalingPathway	IGHV4-30-1	28399	immunoglobulin heavy variable 4-30-1
BCRSignalingPathway	IGHV4-30-2	28398	immunoglobulin heavy variable 4-30-2
BCRSignalingPathway	IGHV4-30-4	28397	immunoglobulin heavy variable 4-30-4
BCRSignalingPathway	IGHV4-31	28396	immunoglobulin heavy variable 4-31
BCRSignalingPathway	IGHV4-34	28395	immunoglobulin heavy variable 4-34
BCRSignalingPathway	IGHV4-39	28394	immunoglobulin heavy variable 4-39
BCRSignalingPathway	IGHV4-4	28401	immunoglobulin heavy variable 4-4
BCRSignalingPathway	IGHV4-59	28392	immunoglobulin heavy variable 4-59
BCRSignalingPathway	IGHV4-61	28391	immunoglobulin heavy variable 4-61
BCRSignalingPathway	IGHV4-38-2	28389	immunoglobulin heavy variable 4-38-2
BCRSignalingPathway	IGHV5-51	28388	immunoglobulin heavy variable 5-51
BCRSignalingPathway	IGHV5-10-1	28386	immunoglobulin heavy variable 5-10-1
BCRSignalingPathway	IGHV6-1	28385	immunoglobulin heavy variable 6-1
BCRSignalingPathway	IGHV7-4-1	57289	immunoglobulin heavy variable 7-4-1
BCRSignalingPathway	IGHV7-81	28378	immunoglobulin heavy variable 7-81 (non-functional)
BCRSignalingPathway	IGK	50802	immunoglobulin kappa locus
BCRSignalingPathway	IGKC	3514	immunoglobulin kappa constant
BCRSignalingPathway	IGKDEL	3515	immunoglobulin kappa deleting element or like
BCRSignalingPathway	IGKJ	7842	-
BCRSignalingPathway	IGKJ1	28950	immunoglobulin kappa joining 1
BCRSignalingPathway	IGKJ2	28949	immunoglobulin kappa joining 2
BCRSignalingPathway	IGKJ3	28948	immunoglobulin kappa joining 3
BCRSignalingPathway	IGKJ4	28947	immunoglobulin kappa joining 4
BCRSignalingPathway	IGKJ5	28946	immunoglobulin kappa joining 5
BCRSignalingPathway	IGKV@	3519	-
BCRSignalingPathway	IGKV1-12	28940	immunoglobulin kappa variable 1-12
BCRSignalingPathway	IGKV1-13	28939	immunoglobulin kappa variable 1-13
BCRSignalingPathway	IGKV1-16	28938	immunoglobulin kappa variable 1-16
BCRSignalingPathway	IGKV1-17	28937	immunoglobulin kappa variable 1-17
BCRSignalingPathway	IGKV1-27	28935	immunoglobulin kappa variable 1-27
BCRSignalingPathway	IGKV1-33	28933	immunoglobulin kappa variable 1-33
BCRSignalingPathway	IGKV1-37	28931	immunoglobulin kappa variable 1-37 (non-functional)
BCRSignalingPathway	IGKV1-39	28930	immunoglobulin kappa variable 1-39
BCRSignalingPathway	IGKV1-5	28299	immunoglobulin kappa variable 1-5
BCRSignalingPathway	IGKV1-6	28943	immunoglobulin kappa variable 1-6
BCRSignalingPathway	IGKV1-8	28942	immunoglobulin kappa variable 1-8
BCRSignalingPathway	IGKV1-9	28941	immunoglobulin kappa variable 1-9
BCRSignalingPathway	IGKV1D-12	28903	immunoglobulin kappa variable 1D-12
BCRSignalingPathway	IGKV1D-13	28902	immunoglobulin kappa variable 1D-13
BCRSignalingPathway	IGKV1D-16	28901	immunoglobulin kappa variable 1D-16
BCRSignalingPathway	IGKV1D-17	28900	immunoglobulin kappa variable 1D-17
BCRSignalingPathway	IGKV1D-33	28896	immunoglobulin kappa variable 1D-33
BCRSignalingPathway	IGKV1D-37	28894	immunoglobulin kappa variable 1D-37 (non-functional)
BCRSignalingPathway	IGKV1D-39	28893	immunoglobulin kappa variable 1D-39
BCRSignalingPathway	IGKV1D-42	28892	immunoglobulin kappa variable 1D-42 (non-functional)
BCRSignalingPathway	IGKV1D-43	28891	immunoglobulin kappa variable 1D-43
BCRSignalingPathway	IGKV1D-8	28904	immunoglobulin kappa variable 1D-8
BCRSignalingPathway	IGKV2-24	28923	immunoglobulin kappa variable 2-24
BCRSignalingPathway	IGKV2-28	28921	immunoglobulin kappa variable 2-28
BCRSignalingPathway	IGKV2-30	28919	immunoglobulin kappa variable 2-30
BCRSignalingPathway	IGKV2-40	28916	immunoglobulin kappa variable 2-40
BCRSignalingPathway	IGKV2D-24	28885	immunoglobulin kappa variable 2D-24 (non-functional)
BCRSignalingPathway	IGKV2D-28	28883	immunoglobulin kappa variable 2D-28
BCRSignalingPathway	IGKV2D-29	28882	immunoglobulin kappa variable 2D-29
BCRSignalingPathway	IGKV2D-30	28881	immunoglobulin kappa variable 2D-30
BCRSignalingPathway	IGKV2D-40	28878	immunoglobulin kappa variable 2D-40
BCRSignalingPathway	IGKV3-11	28914	immunoglobulin kappa variable 3-11
BCRSignalingPathway	IGKV3-15	28913	immunoglobulin kappa variable 3-15
BCRSignalingPathway	IGKV3-20	28912	immunoglobulin kappa variable 3-20
BCRSignalingPathway	IGKV3-7	28915	immunoglobulin kappa variable 3-7 (non-functional)
BCRSignalingPathway	IGKV3D-11	28876	immunoglobulin kappa variable 3D-11
BCRSignalingPathway	IGKV3D-15	28875	immunoglobulin kappa variable 3D-15
BCRSignalingPathway	IGKV3D-20	28874	immunoglobulin kappa variable 3D-20
BCRSignalingPathway	IGKV3D-7	28877	immunoglobulin kappa variable 3D-7
BCRSignalingPathway	IGKV4-1	28908	immunoglobulin kappa variable 4-1
BCRSignalingPathway	IGKV5-2	28907	immunoglobulin kappa variable 5-2
BCRSignalingPathway	IGKV6-21	28906	immunoglobulin kappa variable 6-21 (non-functional)
BCRSignalingPathway	IGKV6D-21	28870	immunoglobulin kappa variable 6D-21 (non-functional)
BCRSignalingPathway	IGKV6D-41	28869	immunoglobulin kappa variable 6D-41 (non-functional)
BCRSignalingPathway	IGL	3535	immunoglobulin lambda locus
BCRSignalingPathway	IGLC1	3537	immunoglobulin lambda constant 1
BCRSignalingPathway	IGLC2	3538	immunoglobulin lambda constant 2
BCRSignalingPathway	IGLC3	3539	immunoglobulin lambda constant 3 (Kern-Oz+ marker)
BCRSignalingPathway	IGLC6	3542	immunoglobulin lambda constant 6
BCRSignalingPathway	IGLC7	28834	immunoglobulin lambda constant 7
BCRSignalingPathway	IGLJ	8217	-
BCRSignalingPathway	IGLJ1	28833	immunoglobulin lambda joining 1
BCRSignalingPathway	IGLJ2	28832	immunoglobulin lambda joining 2
BCRSignalingPathway	IGLJ3	28831	immunoglobulin lambda joining 3
BCRSignalingPathway	IGLJ4	28830	immunoglobulin lambda joining 4 (non-functional)
BCRSignalingPathway	IGLJ5	28829	immunoglobulin lambda joining 5 (non-functional)
BCRSignalingPathway	IGLJ6	28828	immunoglobulin lambda joining 6
BCRSignalingPathway	IGLJ7	28827	immunoglobulin lambda joining 7
BCRSignalingPathway	IGLV@	3546	-
BCRSignalingPathway	IGLV1-36	28826	immunoglobulin lambda variable 1-36
BCRSignalingPathway	IGLV1-40	28825	immunoglobulin lambda variable 1-40
BCRSignalingPathway	IGLV1-44	28823	immunoglobulin lambda variable 1-44
BCRSignalingPathway	IGLV1-47	28822	immunoglobulin lambda variable 1-47
BCRSignalingPathway	IGLV1-50	28821	immunoglobulin lambda variable 1-50 (non-functional)
BCRSignalingPathway	IGLV1-51	28820	immunoglobulin lambda variable 1-51
BCRSignalingPathway	IGLV10-54	28772	immunoglobulin lambda variable 10-54
BCRSignalingPathway	IGLV11-55	28770	immunoglobulin lambda variable 11-55 (non-functional)
BCRSignalingPathway	IGLV2-11	28816	immunoglobulin lambda variable 2-11
BCRSignalingPathway	IGLV2-14	28815	immunoglobulin lambda variable 2-14
BCRSignalingPathway	IGLV2-18	28814	immunoglobulin lambda variable 2-18
BCRSignalingPathway	IGLV2-23	28813	immunoglobulin lambda variable 2-23
BCRSignalingPathway	IGLV2-33	28811	immunoglobulin lambda variable 2-33 (non-functional)
BCRSignalingPathway	IGLV2-8	28817	immunoglobulin lambda variable 2-8
BCRSignalingPathway	IGLV3-1	28809	immunoglobulin lambda variable 3-1
BCRSignalingPathway	IGLV3-10	28803	immunoglobulin lambda variable 3-10
BCRSignalingPathway	IGLV3-12	28802	immunoglobulin lambda variable 3-12
BCRSignalingPathway	IGLV3-16	28799	immunoglobulin lambda variable 3-16
BCRSignalingPathway	IGLV3-19	28797	immunoglobulin lambda variable 3-19
BCRSignalingPathway	IGLV3-21	28796	immunoglobulin lambda variable 3-21
BCRSignalingPathway	IGLV3-22	28795	immunoglobulin lambda variable 3-22
BCRSignalingPathway	IGLV3-25	28793	immunoglobulin lambda variable 3-25
BCRSignalingPathway	IGLV3-27	28791	immunoglobulin lambda variable 3-27
BCRSignalingPathway	IGLV3-32	28787	immunoglobulin lambda variable 3-32 (non-functional)
BCRSignalingPathway	IGLV3-9	28804	immunoglobulin lambda variable 3-9
BCRSignalingPathway	IGLV4-3	28786	immunoglobulin lambda variable 4-3
BCRSignalingPathway	IGLV4-60	28785	immunoglobulin lambda variable 4-60
BCRSignalingPathway	IGLV4-69	28784	immunoglobulin lambda variable 4-69
BCRSignalingPathway	IGLV5-37	28783	immunoglobulin lambda variable 5-37
BCRSignalingPathway	IGLV5-39	28782	immunoglobulin lambda variable 5-39
BCRSignalingPathway	IGLV5-45	28781	immunoglobulin lambda variable 5-45
BCRSignalingPathway	IGLV5-48	28780	immunoglobulin lambda variable 5-48 (non-functional)
BCRSignalingPathway	IGLV5-52	28779	immunoglobulin lambda variable 5-52
BCRSignalingPathway	IGLV6-57	28778	immunoglobulin lambda variable 6-57
BCRSignalingPathway	IGLV7-43	28776	immunoglobulin lambda variable 7-43
BCRSignalingPathway	IGLV7-46	28775	immunoglobulin lambda variable 7-46
BCRSignalingPathway	IGLV8-61	28774	immunoglobulin lambda variable 8-61
BCRSignalingPathway	IGLV9-49	28773	immunoglobulin lambda variable 9-49
Chemokines	C3	718	complement C3
Chemokines	C5	727	complement C5
Chemokines	CAMP	820	cathelicidin antimicrobial peptide
Chemokines	CCL1	6346	C-C motif chemokine ligand 1
Chemokines	CCL11	6356	C-C motif chemokine ligand 11
Chemokines	CCL13	6357	C-C motif chemokine ligand 13
Chemokines	CCL14	6358	C-C motif chemokine ligand 14
Chemokines	CCL15-CCL14	348249	CCL15-CCL14 readthrough (NMD candidate)
Chemokines	CCL15	6359	C-C motif chemokine ligand 15
Chemokines	CCL16	6360	C-C motif chemokine ligand 16
Chemokines	CCL17	6361	C-C motif chemokine ligand 17
Chemokines	CCL18	6362	C-C motif chemokine ligand 18
Chemokines	CCL19	6363	C-C motif chemokine ligand 19
Chemokines	CCL2	6347	C-C motif chemokine ligand 2
Chemokines	CCL20	6364	C-C motif chemokine ligand 20
Chemokines	CCL21	6366	C-C motif chemokine ligand 21
Chemokines	CCL22	6367	C-C motif chemokine ligand 22
Chemokines	CCL23	6368	C-C motif chemokine ligand 23
Chemokines	CCL24	6369	C-C motif chemokine ligand 24
Chemokines	CCL25	6370	C-C motif chemokine ligand 25
Chemokines	CCL26	10344	C-C motif chemokine ligand 26
Chemokines	CCL27	10850	C-C motif chemokine ligand 27
Chemokines	CCL28	56477	C-C motif chemokine ligand 28
Chemokines	CCL3	6348	C-C motif chemokine ligand 3
Chemokines	CCL3L1	6349	C-C motif chemokine ligand 3 like 1
Chemokines	CCL3P1	390788	C-C motif chemokine ligand 3 pseudogene 1
Chemokines	CCL3L3	414062	C-C motif chemokine ligand 3 like 3
Chemokines	CCL4	6351	C-C motif chemokine ligand 4
Chemokines	CCL4L2	9560	C-C motif chemokine ligand 4 like 2
Chemokines	CCL4L1	388372	C-C motif chemokine ligand 4 like 1
Chemokines	CCL5	6352	C-C motif chemokine ligand 5
Chemokines	CCL7	6354	C-C motif chemokine ligand 7
Chemokines	CCL8	6355	C-C motif chemokine ligand 8
Chemokines	CKLF	51192	chemokine like factor
Chemokines	CMA1	1215	chymase 1
Chemokines	CTSG	1511	cathepsin G
Chemokines	CX3CL1	6376	C-X3-C motif chemokine ligand 1
Chemokines	CXCL1	2919	C-X-C motif chemokine ligand 1
Chemokines	CXCL10	3627	C-X-C motif chemokine ligand 10
Chemokines	CXCL11	6373	C-X-C motif chemokine ligand 11
Chemokines	CXCL12	6387	C-X-C motif chemokine ligand 12
Chemokines	CXCL13	10563	C-X-C motif chemokine ligand 13
Chemokines	CXCL14	9547	C-X-C motif chemokine ligand 14
Chemokines	CXCL16	58191	C-X-C motif chemokine ligand 16
Chemokines	CXCL17	284340	C-X-C motif chemokine ligand 17
Chemokines	CXCL2	2920	C-X-C motif chemokine ligand 2
Chemokines	CXCL3	2921	C-X-C motif chemokine ligand 3
Chemokines	CXCL5	6374	C-X-C motif chemokine ligand 5
Chemokines	CXCL6	6372	C-X-C motif chemokine ligand 6
Chemokines	CXCL9	4283	C-X-C motif chemokine ligand 9
Chemokines	CCN1	3491	cellular communication network factor 1
Chemokines	DEFA1	1667	defensin alpha 1
Chemokines	DEFA3	1668	defensin alpha 3
Chemokines	DEFA5	1670	defensin alpha 5
Chemokines	DEFB1	1672	defensin beta 1
Chemokines	DEFB103B	55894	defensin beta 103B
Chemokines	DEFB104A	140596	defensin beta 104A
Chemokines	DEFB4A	1673	defensin beta 4A
Chemokines	EDN1	1906	endothelin 1
Chemokines	EDN2	1907	endothelin 2
Chemokines	EDN3	1908	endothelin 3
Chemokines	FGF10	2255	fibroblast growth factor 10
Chemokines	FGF2	2247	fibroblast growth factor 2
Chemokines	HTN3	3347	histatin 3
Chemokines	CXCL8	3576	C-X-C motif chemokine ligand 8
Chemokines	LECT2	3950	leukocyte cell derived chemotaxin 2
Chemokines	PF4	5196	platelet factor 4
Chemokines	PF4V1	5197	platelet factor 4 variant 1
Chemokines	PLAU	5328	plasminogen activator, urokinase
Chemokines	PPBP	5473	pro-platelet basic protein
Chemokines	PPBPP1	728045	pro-platelet basic protein pseudogene 1
Chemokines	PROK2	60675	prokineticin 2
Chemokines	RNASE2	6036	ribonuclease A family member 2
Chemokines	SAA1	6288	serum amyloid A1
Chemokines	SAA2	6289	serum amyloid A2
Chemokines	SBDS	51119	SBDS ribosome maturation factor
Chemokines	SEMA3A	10371	semaphorin 3A
Chemokines	SEMA3B	7869	semaphorin 3B
Chemokines	SEMA3C	10512	semaphorin 3C
Chemokines	SEMA3D	223117	semaphorin 3D
Chemokines	SEMA3E	9723	semaphorin 3E
Chemokines	SEMA3F	6405	semaphorin 3F
Chemokines	SEMA3G	56920	semaphorin 3G
Chemokines	SEMA4A	64218	semaphorin 4A
Chemokines	SEMA4B	10509	semaphorin 4B
Chemokines	SEMA4C	54910	semaphorin 4C
Chemokines	SEMA4D	10507	semaphorin 4D
Chemokines	SEMA4F	10505	ssemaphorin 4F
Chemokines	SEMA4G	57715	semaphorin 4G
Chemokines	SEMA5A	9037	semaphorin 5A
Chemokines	SEMA5B	54437	semaphorin 5B
Chemokines	SEMA6A	57556	semaphorin 6A
Chemokines	SEMA6B	10501	semaphorin 6B
Chemokines	SEMA6C	10500	semaphorin 6C
Chemokines	SEMA6D	80031	semaphorin 6D
Chemokines	SEMA7A	8482	semaphorin 7A (John Milton Hagen blood group)
Chemokines	SLIT1	6585	slit guidance ligand 1
Chemokines	SLIT2	9353	slit guidance ligand 2
Chemokines	TNC	3371	tenascin C
Chemokines	TYMP	1890	thymidine phosphorylase
Chemokines	XCL1	6375	X-C motif chemokine ligand 1
Chemokines	XCL2	6846	X-C motif chemokine ligand 2
Chemokine Receptors	C5AR1	728	complement C5a receptor 1
Chemokine Receptors	ACKR2	1238	atypical chemokine receptor 2
Chemokine Receptors	CCR1	1230	C-C motif chemokine receptor 1
Chemokine Receptors	CCR10	2826	C-C motif chemokine receptor 10
Chemokine Receptors	CCR3	1232	C-C motif chemokine receptor 3
Chemokine Receptors	CCR4	1233	C-C motif chemokine receptor 4
Chemokine Receptors	CCR5	1234	C-C motif chemokine receptor 5
Chemokine Receptors	CCR6	1235	C-C motif chemokine receptor 6
Chemokine Receptors	CCR7	1236	C-C motif chemokine receptor 7
Chemokine Receptors	CCR8	1237	C-C motif chemokine receptor 8
Chemokine Receptors	CCR9	10803	C-C motif chemokine receptor 9
Chemokine Receptors	ACKR4	51554	atypical chemokine receptor 4
Chemokine Receptors	CCRL2	9034	C-C motif chemokine receptor like 2
Chemokine Receptors	CMKLR1	1240	chemerin chemokine-like receptor 1
Chemokine Receptors	CX3CR1	1524	C-X3-C motif chemokine receptor 1
Chemokine Receptors	CXCR3	2833	C-X-C motif chemokine receptor 3
Chemokine Receptors	CXCR4	7852	C-X-C motif chemokine receptor 4
Chemokine Receptors	CXCR5	643	C-X-C motif chemokine receptor 5
Chemokine Receptors	CXCR6	10663	C-X-C motif chemokine receptor 6
Chemokine Receptors	ACKR3	57007	atypical chemokine receptor 3
Chemokine Receptors	CYSLTR1	10800	cysteinyl leukotriene receptor 1
Chemokine Receptors	CYSLTR2	57105	cysteinyl leukotriene receptor 2
Chemokine Receptors	ACKR1	2532	atypical chemokine receptor 1 (Duffy blood group)
Chemokine Receptors	EDNRA	1909	endothelin receptor type A
Chemokine Receptors	EDNRB	1910	endothelin receptor type B
Chemokine Receptors	FPR1	2357	formyl peptide receptor 1
Chemokine Receptors	FPR2	2358	formyl peptide receptor 2
Chemokine Receptors	FPR2	2358	formyl peptide receptor 2
Chemokine Receptors	GPR17	2840	G protein-coupled receptor 17
Chemokine Receptors	GPR32	2854	G protein-coupled receptor 32
Chemokine Receptors	GPR33	2856	G protein-coupled receptor 33
Chemokine Receptors	PTGDR2	11251	prostaglandin D2 receptor 2
Chemokine Receptors	C5AR2	27202	complement component 5a receptor 2
Chemokine Receptors	CXCR1	3577	C-X-C motif chemokine receptor 1
Chemokine Receptors	CXCR2	3579	C-X-C motif chemokine receptor 2
Chemokine Receptors	LTB4R	1241	leukotriene B4 receptor
Chemokine Receptors	LTB4R2	56413	leukotriene B4 receptor 2
Chemokine Receptors	PLAUR	5329	plasminogen activator, urokinase receptor
Chemokine Receptors	PLXNA1	5361	plexin A1
Chemokine Receptors	PLXNA2	5362	plexin A2
Chemokine Receptors	PLXNA3	55558	plexin A3
Chemokine Receptors	PLXNA4	91584	plexin A4
Chemokine Receptors	PLXNB1	5364	plexin B1
Chemokine Receptors	PLXNB2	23654	plexin B2
Chemokine Receptors	PLXNB3	5365	plexin B3
Chemokine Receptors	PLXNC1	10154	plexin C1
Chemokine Receptors	PLXND1	23129	plexin D1
Chemokine Receptors	PTAFR	5724	platelet activating factor receptor
Chemokine Receptors	ROBO1	6091	roundabout guidance receptor 1
Chemokine Receptors	ROBO2	6092	roundabout guidance receptor 2
Chemokine Receptors	ROBO3	64221	roundabout guidance receptor 3
Chemokine Receptors	RXFP3	51289	relaxin family peptide receptor 3
Chemokine Receptors	XCR1	2829	X-C motif chemokine receptor 1
Cytokines	ADIPOQ	9370	adiponectin, C1Q and collagen domain containing
Cytokines	ADM	133	adrenomedullin
Cytokines	ADM2	79924	adrenomedullin 2
Cytokines	AGRP	181	agouti related neuropeptide
Cytokines	AGT	183	angiotensinogen
Cytokines	AMBN	258	ameloblastin
Cytokines	AMELX	265	amelogenin X-linked
Cytokines	AMH	268	anti-Mullerian hormone
Cytokines	ANGPTL5	253935	angiopoietin like 5
Cytokines	ANGPTL7	10218	angiopoietin like 7
Cytokines	APLN	8862	apelin
Cytokines	AREG	374	amphiregulin
Cytokines	MANF	7873	mesencephalic astrocyte derived neurotrophic factor
Cytokines	CDNF	441549	cerebral dopamine neurotrophic factor
Cytokines	ARTN	9048	artemin
Cytokines	AVP	551	arginine vasopressin
Cytokines	AZU1	566	azurocidin 1
Cytokines	BDNF	627	brain derived neurotrophic factor
Cytokines	BMP1	649	bone morphogenetic protein 1
Cytokines	BMP10	27302	bone morphogenetic protein 10
Cytokines	BMP15	9210	bone morphogenetic protein 15
Cytokines	BMP2	650	bone morphogenetic protein 2
Cytokines	BMP3	651	bone morphogenetic protein 3
Cytokines	BMP4	652	bone morphogenetic protein 4
Cytokines	BMP5	653	bone morphogenetic protein 5
Cytokines	BMP6	654	bone morphogenetic protein 6
Cytokines	BMP7	655	bone morphogenetic protein 7
Cytokines	BMP8A	353500	bone morphogenetic protein 8a
Cytokines	BMP8B	656	bone morphogenetic protein 8b
Cytokines	BTC	685	betacellulin
Cytokines	MYDGF	56005	myeloid derived growth factor
Cytokines	C3	718	complement C3
Cytokines	C5	727	complement C5
Cytokines	CALCA	796	calcitonin related polypeptide alpha
Cytokines	CALCB	797	calcitonin related polypeptide beta
Cytokines	CAMP	820	cathelicidin antimicrobial peptide
Cytokines	CAT	847	catalase
Cytokines	CCK	885	cholecystokinin
Cytokines	CCL1	6346	C-C motif chemokine ligand 1
Cytokines	CCL11	6356	C-C motif chemokine ligand 11
Cytokines	CCL13	6357	C-C motif chemokine ligand 13
Cytokines	CCL14	6358	C-C motif chemokine ligand 14
Cytokines	CCL15-CCL14	348249	CCL15-CCL14 readthrough (NMD candidate)
Cytokines	CCL15	6359	C-C motif chemokine ligand 15
Cytokines	CCL16	6360	C-C motif chemokine ligand 16
Cytokines	CCL17	6361	C-C motif chemokine ligand 17
Cytokines	CCL18	6362	C-C motif chemokine ligand 18
Cytokines	CCL19	6363	C-C motif chemokine ligand 19
Cytokines	CCL2	6347	C-C motif chemokine ligand 2
Cytokines	CCL20	6364	C-C motif chemokine ligand 20
Cytokines	CCL21	6366	C-C motif chemokine ligand 21
Cytokines	CCL22	6367	C-C motif chemokine ligand 22
Cytokines	CCL23	6368	C-C motif chemokine ligand 23
Cytokines	CCL24	6369	C-C motif chemokine ligand 24
Cytokines	CCL25	6370	C-C motif chemokine ligand 25
Cytokines	CCL26	10344	C-C motif chemokine ligand 26
Cytokines	CCL27	10850	C-C motif chemokine ligand 27
Cytokines	CCL28	56477	C-C motif chemokine ligand 28
Cytokines	CCL3	6348	C-C motif chemokine ligand 3
Cytokines	CCL3L1	6349	C-C motif chemokine ligand 3 like 1
Cytokines	CCL3P1	390788	C-C motif chemokine ligand 3 pseudogene 1
Cytokines	CCL3L3	414062	C-C motif chemokine ligand 3 like 3
Cytokines	CCL4	6351	C-C motif chemokine ligand 4
Cytokines	CCL4L2	9560	C-C motif chemokine ligand 4 like 2
Cytokines	CCL4L1	388372	C-C motif chemokine ligand 4 like 1
Cytokines	CCL5	6352	C-C motif chemokine ligand 5
Cytokines	CCL7	6354	C-C motif chemokine ligand 7
Cytokines	CCL8	6355	C-C motif chemokine ligand 8
Cytokines	CD320	51293	CD320 molecule
Cytokines	CD40LG	959	CD40 ligand
Cytokines	CD70	970	CD70 molecule
Cytokines	ADA2	51816	adenosine deaminase 2
Cytokines	CER1	9350	cerberus 1, DAN family BMP antagonist
Cytokines	CGA	1081	glycoprotein hormones, alpha polypeptide
Cytokines	CGB3	1082	chorionic gonadotropin subunit beta 3
Cytokines	CGB1	114335	chorionic gonadotropin subunit beta 1
Cytokines	CGB2	114336	chorionic gonadotropin subunit beta 2
Cytokines	CGB5	93659	chorionic gonadotropin subunit beta 5
Cytokines	CGB7	94027	chorionic gonadotropin subunit beta 7
Cytokines	CGB8	94115	chorionic gonadotropin subunit beta 8
Cytokines	CHGA	1113	chromogranin A
Cytokines	CHGB	1114	chromogranin B
Cytokines	CKLF	51192	chemokine like factor
Cytokines	CLCF1	23529	cardiotrophin like cytokine factor 1
Cytokines	CLEC11A	6320	C-type lectin domain containing 11A
Cytokines	CMA1	1215	chymase 1
Cytokines	CMTM1	113540	CKLF like MARVEL transmembrane domain containing 1
Cytokines	CMTM2	146225	CKLF like MARVEL transmembrane domain containing 2
Cytokines	CMTM3	123920	CKLF like MARVEL transmembrane domain containing 3
Cytokines	CMTM4	146223	CKLF like MARVEL transmembrane domain containing 4
Cytokines	CMTM5	116173	CKLF like MARVEL transmembrane domain containing 5
Cytokines	CMTM6	54918	CKLF like MARVEL transmembrane domain containing 6
Cytokines	CMTM7	112616	CKLF like MARVEL transmembrane domain containing 7
Cytokines	CMTM8	152189	CKLF like MARVEL transmembrane domain containing 8
Cytokines	CNTF	1270	ciliary neurotrophic factor
Cytokines	CORT	1325	cortistatin
Cytokines	CRH	1392	corticotropin releasing hormone
Cytokines	CSF1	1435	colony stimulating factor 1
Cytokines	CSF2	1437	colony stimulating factor 2
Cytokines	CSF3	1440	colony stimulating factor 3
Cytokines	CSH1	1442	chorionic somatomammotropin hormone 1
Cytokines	CSH2	1443	chorionic somatomammotropin hormone 2
Cytokines	CSHL1	1444	chorionic somatomammotropin hormone like 1
Cytokines	CSPG5	10675	chondroitin sulfate proteoglycan 5
Cytokines	CTF1	1489	cardiotrophin 1
Cytokines	CCN2	1490	cellular communication network factor 2
Cytokines	CTSG	1511	cathepsin G
Cytokines	CX3CL1	6376	C-X3-C motif chemokine ligand 1
Cytokines	CXCL1	2919	C-X-C motif chemokine ligand 1
Cytokines	CXCL10	3627	C-X-C motif chemokine ligand 10
Cytokines	CXCL11	6373	C-X-C motif chemokine ligand 11
Cytokines	CXCL12	6387	C-X-C motif chemokine ligand 12
Cytokines	CXCL13	10563	C-X-C motif chemokine ligand 13
Cytokines	CXCL14	9547	C-X-C motif chemokine ligand 14
Cytokines	CXCL16	58191	C-X-C motif chemokine ligand 16
Cytokines	CXCL17	284340	C-X-C motif chemokine ligand 17
Cytokines	CXCL2	2920	C-X-C motif chemokine ligand 2
Cytokines	CXCL3	2921	C-X-C motif chemokine ligand 3
Cytokines	CXCL5	6374	C-X-C motif chemokine ligand 5
Cytokines	CXCL6	6372	C-X-C motif chemokine ligand 6
Cytokines	CXCL9	4283	C-X-C motif chemokine ligand 9
Cytokines	CCN1	3491	cellular communication network factor 1
Cytokines	DEFA1	1667	defensin alpha 1
Cytokines	DEFA3	1668	defensin alpha 3
Cytokines	DEFA5	1670	defensin alpha 5
Cytokines	DEFB1	1672	defensin beta 1
Cytokines	DEFB103B	55894	defensin beta 103B
Cytokines	DEFB104A	140596	defensin beta 104A
Cytokines	DEFB4A	1673	defensin beta 4A
Cytokines	DKK1	22943	dickkopf WNT signaling pathway inhibitor 1
Cytokines	EBI3	10148	Epstein-Barr virus induced 3
Cytokines	EDN1	1906	endothelin 1
Cytokines	EDN2	1907	endothelin 2
Cytokines	EDN3	1908	endothelin 3
Cytokines	EGF	1950	epidermal growth factor
Cytokines	EPGN	255324	epithelial mitogen
Cytokines	EPO	2056	erythropoietin
Cytokines	EREG	2069	epiregulin
Cytokines	ESM1	11082	endothelial cell specific molecule 1
Cytokines	FAM3B	54097	FAM3 metabolism regulating signaling molecule B
Cytokines	FAM3C	10447	FAM3 metabolism regulating signaling molecule C
Cytokines	FAM3D	131177	FAM3 metabolism regulating signaling molecule D
Cytokines	FASLG	356	Fas ligand
Cytokines	FGF1	2246	fibroblast growth factor 1
Cytokines	FGF10	2255	fibroblast growth factor 10
Cytokines	FGF11	2256	fibroblast growth factor 11
Cytokines	FGF12	2257	fibroblast growth factor 12
Cytokines	FGF13	2258	fibroblast growth factor 13
Cytokines	FGF14	2259	fibroblast growth factor 14
Cytokines	FGF16	8823	fibroblast growth factor 16
Cytokines	FGF17	8822	fibroblast growth factor 17
Cytokines	FGF18	8817	fibroblast growth factor 18
Cytokines	FGF19	9965	fibroblast growth factor 19
Cytokines	FGF2	2247	fibroblast growth factor 2
Cytokines	FGF20	26281	fibroblast growth factor 20
Cytokines	FGF21	26291	fibroblast growth factor 21
Cytokines	FGF22	27006	fibroblast growth factor 22
Cytokines	FGF23	8074	fibroblast growth factor 23
Cytokines	FGF3	2248	fibroblast growth factor 3
Cytokines	FGF4	2249	fibroblast growth factor 4
Cytokines	FGF5	2250	fibroblast growth factor 5
Cytokines	FGF6	2251	fibroblast growth factor 6
Cytokines	FGF7	2252	fibroblast growth factor 7
Cytokines	FGF8	2253	fibroblast growth factor 8
Cytokines	FGF9	2254	fibroblast growth factor 9
Cytokines	VEGFD	2277	vascular endothelial growth factor D
Cytokines	FIGNL2	401720	fidgetin like 2
Cytokines	FLT3LG	2323	fms related receptor tyrosine kinase 3 ligand
Cytokines	FSHB	2488	follicle stimulating hormone subunit beta
Cytokines	GAL	51083	galanin and GMAP prepropeptide
Cytokines	GALP	85569	galanin like peptide
Cytokines	GAST	2520	gastrin
Cytokines	GCG	2641	glucagon
Cytokines	GDF1	2657	growth differentiation factor 1
Cytokines	GDF10	2662	growth differentiation factor 10
Cytokines	GDF11	10220	growth differentiation factor 11
Cytokines	GDF15	9518	growth differentiation factor 15
Cytokines	GDF2	2658	growth differentiation factor 2
Cytokines	GDF3	9573	growth differentiation factor 3
Cytokines	GDF5	8200	growth differentiation factor 5
Cytokines	GDF6	392255	growth differentiation factor 6
Cytokines	GDF7	151449	growth differentiation factor 7
Cytokines	GDF9	2661	growth differentiation factor 9
Cytokines	GDNF	2668	glial cell derived neurotrophic factor
Cytokines	GH1	2688	growth hormone 1
Cytokines	GH2	2689	growth hormone 2
Cytokines	GHRH	2691	growth hormone releasing hormone
Cytokines	GHRL	51738	ghrelin and obestatin prepropeptide
Cytokines	GIP	2695	gastric inhibitory polypeptide
Cytokines	GKN1	56287	gastrokine 1
Cytokines	GMFB	2764	glia maturation factor beta
Cytokines	GMFG	9535	glia maturation factor gamma
Cytokines	GNRH1	2796	gonadotropin releasing hormone 1
Cytokines	GNRH2	2797	gonadotropin releasing hormone 2
Cytokines	GPHA2	170589	glycoprotein hormone subunit alpha 2
Cytokines	GPHB5	122876	glycoprotein hormone subunit beta 5
Cytokines	GPI	2821	glucose-6-phosphate isomerase
Cytokines	GREM1	26585	gremlin 1, DAN family BMP antagonist
Cytokines	GREM2	64388	gremlin 2, DAN family BMP antagonist
Cytokines	GRN	2896	granulin precursor
Cytokines	GRP	2922	gastrin releasing peptide
Cytokines	GUCA2A	2980	guanylate cyclase activator 2A
Cytokines	HAMP	57817	hepcidin antimicrobial peptide
Cytokines	HBEGF	1839	heparin binding EGF like growth factor
Cytokines	HDGF	3068	heparin binding growth factor
Cytokines	HDGFL3	50810	HDGF like 3
Cytokines	HGF	3082	hepatocyte growth factor
Cytokines	HTN3	3347	histatin 3
Cytokines	IAPP	3375	islet amyloid polypeptide
Cytokines	IFNA1	3439	interferon alpha 1
Cytokines	IFNA10	3446	interferon alpha 10
Cytokines	IFNA13	3447	interferon alpha 13
Cytokines	IFNA14	3448	interferon alpha 14
Cytokines	IFNA16	3449	interferon alpha 16
Cytokines	IFNA17	3451	interferon alpha 17
Cytokines	IFNA2	3440	interferon alpha 2
Cytokines	IFNA21	3452	interferon alpha 21
Cytokines	IFNA4	3441	interferon alpha 4
Cytokines	IFNA5	3442	interferon alpha 5
Cytokines	IFNA6	3443	interferon alpha 6
Cytokines	IFNA7	3444	interferon alpha 7
Cytokines	IFNA8	3445	interferon alpha 8
Cytokines	IFNB1	3456	interferon beta 1
Cytokines	IFNE	338376	interferon epsilon
Cytokines	IFNG	3458	interferon gamma
Cytokines	IFNK	56832	interferon kappa
Cytokines	IFNW1	3467	interferon omega 1
Cytokines	IGF1	3479	insulin like growth factor 1
Cytokines	IGF2	3481	insulin like growth factor 2
Cytokines	IL10	3586	interleukin 10
Cytokines	IL11	3589	interleukin 11
Cytokines	IL12A	3592	interleukin 12A
Cytokines	IL12B	3593	interleukin 12B
Cytokines	IL13	3596	interleukin 13
Cytokines	IL15	3600	interleukin 15
Cytokines	IL16	3603	interleukin 16
Cytokines	IL17A	3605	interleukin 17A
Cytokines	IL17B	27190	interleukin 17B
Cytokines	IL17C	27189	interleukin 17C
Cytokines	IL17D	53342	interleukin 17D
Cytokines	IL17F	112744	interleukin 17F
Cytokines	IL18	3606	interleukin 18
Cytokines	IL19	29949	interleukin 19
Cytokines	IL1A	3552	interleukin 1 alpha
Cytokines	IL1B	3553	interleukin 1 beta
Cytokines	IL1F10	84639	interleukin 1 family member 10
Cytokines	IL36RN	26525	interleukin 36 receptor antagonist
Cytokines	IL36A	27179	interleukin 36 alpha
Cytokines	IL37	27178	interleukin 37
Cytokines	IL36B	27177	interleukin 36 beta
Cytokines	IL36G	56300	interleukin 36 gamma
Cytokines	IL1RN	3557	interleukin 1 receptor antagonist
Cytokines	IL2	3558	interleukin 2
Cytokines	IL20	50604	interleukin 20
Cytokines	IL21	59067	interleukin 21
Cytokines	IL22	50616	interleukin 22
Cytokines	IL23A	51561	interleukin 23 subunit alpha
Cytokines	IL24	11009	interleukin 24
Cytokines	IL25	64806	interleukin 25
Cytokines	IL26	55801	interleukin 26
Cytokines	IL27	246778	interleukin 27
Cytokines	IFNL2	282616	interferon lambda 2
Cytokines	IFNL3	282617	interferon lambda 3
Cytokines	IFNL1	282618	interferon lambda 1
Cytokines	IL3	3562	interleukin 3
Cytokines	IL31	386653	interleukin 31
Cytokines	IL32	9235	interleukin 32
Cytokines	IL33	90865	interleukin 33
Cytokines	IL34	146433	interleukin 34
Cytokines	IL4	3565	interleukin 4
Cytokines	IL5	3567	interleukin 5
Cytokines	IL6	3569	interleukin 6
Cytokines	IL6ST	3572	interleukin 6 signal transducer
Cytokines	IL7	3574	interleukin 7
Cytokines	CXCL8	3576	C-X-C motif chemokine ligand 8
Cytokines	IL9	3578	interleukin 9
Cytokines	INHA	3623	inhibin subunit alpha
Cytokines	INHBA	3624	inhibin subunit beta A
Cytokines	INHBB	3625	inhibin subunit beta B
Cytokines	INHBC	3626	inhibin subunit beta C
Cytokines	INHBE	83729	inhibin subunit beta E
Cytokines	INS	3630	insulin
Cytokines	INS-IGF2	723961	INS-IGF2 readthrough
Cytokines	INSL3	3640	insulin like 3
Cytokines	INSL4	3641	insulin like 4
Cytokines	INSL5	10022	insulin like 5
Cytokines	INSL6	11172	insulin like 6
Cytokines	JAG1	182	jagged canonical Notch ligand 1
Cytokines	JAG2	3714	jagged canonical Notch ligand 2
Cytokines	FGF7P6	387628	fibroblast growth factor 7 pseudogene 6
Cytokines	FGF7P3	654466	fibroblast growth factor 7 pseudogene 3
Cytokines	KITLG	4254	KIT ligand
Cytokines	KL	9365	klotho
Cytokines	LACRT	90070	lacritin
Cytokines	LECT2	3950	leukocyte cell derived chemotaxin 2
Cytokines	LEFTY1	10637	left-right determination factor 1
Cytokines	LEFTY2	7044	left-right determination factor 2
Cytokines	LEP	3952	leptin
Cytokines	LHB	3972	luteinizing hormone subunit beta
Cytokines	LIF	3976	LIF interleukin 6 family cytokine
Cytokines	LRSAM1	90678	leucine rich repeat and sterile alpha motif containing 1
Cytokines	LTA	4049	lymphotoxin alpha
Cytokines	LTB	4050	lymphotoxin beta
Cytokines	LTBP1	4052	latent transforming growth factor beta binding protein 1
Cytokines	LTBP2	4053	latent transforming growth factor beta binding protein 2
Cytokines	LTBP3	4054	latent transforming growth factor beta binding protein 3
Cytokines	LTBP4	8425	latent transforming growth factor beta binding protein 4
Cytokines	MDK	4192	midkine
Cytokines	MIA	8190	MIA SH3 domain containing
Cytokines	MIF	4282	macrophage migration inhibitory factor
Cytokines	MLN	4295	motilin
Cytokines	MSTN	2660	myostatin
Cytokines	NAMPT	10135	nicotinamide phosphoribosyltransferase
Cytokines	NDP	4693	norrin cystine knot growth factor NDP
Cytokines	NENF	29937	neudesin neurotrophic factor
Cytokines	NGF	4803	nerve growth factor
Cytokines	NMB	4828	neuromedin B
Cytokines	NODAL	4838	nodal growth differentiation factor
Cytokines	CCN3	4856	cellular communication network factor 3
Cytokines	NPFF	8620	neuropeptide FF-amide peptide precursor
Cytokines	NPPA	4878	natriuretic peptide A
Cytokines	NPPB	4879	natriuretic peptide B
Cytokines	NPPC	4880	natriuretic peptide C
Cytokines	NPY	4852	neuropeptide Y
Cytokines	NRG1	3084	neuregulin 1
Cytokines	NRG2	9542	neuregulin 2
Cytokines	NRG3	10718	neuregulin 3
Cytokines	NRG4	145957	neuregulin 4
Cytokines	NRTN	4902	neurturin
Cytokines	NTF3	4908	neurotrophin 3
Cytokines	NTF4	4909	neurotrophin 4
Cytokines	NTS	4922	neurotensin
Cytokines	NUDT6	11162	nudix hydrolase 6
Cytokines	OGN	4969	osteoglycin
Cytokines	OSGIN1	29948	oxidative stress induced growth inhibitor 1
Cytokines	OSM	5008	oncostatin M
Cytokines	OSTN	344901	osteocrin
Cytokines	OXT	5020	oxytocin/neurophysin I prepropeptide
Cytokines	ENDOU	8909	endonuclease, poly(U) specific
Cytokines	PDGFA	5154	platelet derived growth factor subunit A
Cytokines	PDGFB	5155	platelet derived growth factor subunit B
Cytokines	PDGFC	56034	platelet derived growth factor C
Cytokines	PDGFD	80310	platelet derived growth factor D
Cytokines	PDGFRA	5156	platelet derived growth factor receptor alpha
Cytokines	PDGFRB	5159	platelet derived growth factor receptor beta
Cytokines	PDGFRL	5157	platelet derived growth factor receptor like
Cytokines	PDYN	5173	prodynorphin
Cytokines	PENK	5179	proenkephalin
Cytokines	PF4	5196	platelet factor 4
Cytokines	PF4V1	5197	platelet factor 4 variant 1
Cytokines	PGF	5228	placental growth factor
Cytokines	PLAU	5328	plasminogen activator, urokinase
Cytokines	PMCH	5367	pro-melanin concentrating hormone
Cytokines	PNOC	5368	prepronociceptin
Cytokines	POMC	5443	proopiomelanocortin
Cytokines	PPBP	5473	pro-platelet basic protein
Cytokines	PPBPP1	728045	pro-platelet basic protein pseudogene 1
Cytokines	PPBPP2	10895	pro-platelet basic protein pseudogene 2
Cytokines	PPY	5539	pancreatic polypeptide
Cytokines	PRL	5617	prolactin
Cytokines	PRLH	51052	prolactin releasing hormone
Cytokines	PROK1	84432	prokineticin 1
Cytokines	PROK2	60675	prokineticin 2
Cytokines	PSPN	5623	persephin
Cytokines	PTH	5741	parathyroid hormone
Cytokines	PTH2	113091	parathyroid hormone 2
Cytokines	PTHLH	5744	parathyroid hormone like hormone
Cytokines	PTN	5764	pleiotrophin
Cytokines	PYY	5697	peptide YY
Cytokines	QRFP	347148	pyroglutamylated RFamide peptide
Cytokines	RABEP1	9135	rabaptin, RAB GTPase binding effector protein 1
Cytokines	RABEP2	79874	rabaptin, RAB GTPase binding effector protein 2
Cytokines	REG1A	5967	regenerating family member 1 alpha
Cytokines	RETN	56729	resistin
Cytokines	RETNLB	84666	resistin like beta
Cytokines	RLN1	6013	relaxin 1
Cytokines	RLN2	6019	relaxin 2
Cytokines	RLN3	117579	relaxin 3
Cytokines	RNASE2	6036	ribonuclease A family member 2
Cytokines	S100A6	6277	S100 calcium binding protein A6
Cytokines	SAA1	6288	serum amyloid A1
Cytokines	SAA2	6289	serum amyloid A2
Cytokines	SBDS	51119	SBDS ribosome maturation factor
Cytokines	SCG2	7857	secretogranin II
Cytokines	SCGB3A1	92304	secretoglobin family 3A member 1
Cytokines	SCT	6343	secretin
Cytokines	AIMP1	9255	aminoacyl tRNA synthetase complex interacting multifunctional protein 1
Cytokines	SECTM1	6398	secreted and transmembrane 1
Cytokines	SEMA3A	10371	semaphorin 3A
Cytokines	SEMA3B	7869	semaphorin 3B
Cytokines	SEMA3C	10512	semaphorin 3C
Cytokines	SEMA3D	223117	semaphorin 3D
Cytokines	SEMA3E	9723	semaphorin 3E
Cytokines	SEMA3F	6405	semaphorin 3F
Cytokines	SEMA3G	56920	semaphorin 3G
Cytokines	SEMA4A	64218	semaphorin 4A
Cytokines	SEMA4B	10509	semaphorin 4B
Cytokines	SEMA4C	54910	semaphorin 4C
Cytokines	SEMA4D	10507	semaphorin 4D
Cytokines	SEMA4F	10505	ssemaphorin 4F
Cytokines	SEMA4G	57715	semaphorin 4G
Cytokines	SEMA5A	9037	semaphorin 5A
Cytokines	SEMA5B	54437	semaphorin 5B
Cytokines	SEMA6A	57556	semaphorin 6A
Cytokines	SEMA6B	10501	semaphorin 6B
Cytokines	SEMA6C	10500	semaphorin 6C
Cytokines	SEMA6D	80031	semaphorin 6D
Cytokines	SEMA7A	8482	semaphorin 7A (John Milton Hagen blood group)
Cytokines	SLIT1	6585	slit guidance ligand 1
Cytokines	SLIT2	9353	slit guidance ligand 2
Cytokines	SLURP1	57152	secreted LY6/PLAUR domain containing 1
Cytokines	SPP1	6696	secreted phosphoprotein 1
Cytokines	SST	6750	somatostatin
Cytokines	STC1	6781	stanniocalcin 1
Cytokines	STC2	8614	stanniocalcin 2
Cytokines	TAC1	6863	tachykinin precursor 1
Cytokines	TDGF1	6997	teratocarcinoma-derived growth factor 1
Cytokines	TDGF1P3	6998	teratocarcinoma-derived growth factor 1 pseudogene 3
Cytokines	TG	7038	thyroglobulin
Cytokines	TGFA	7039	transforming growth factor alpha
Cytokines	TGFB1	7040	transforming growth factor beta 1
Cytokines	TGFB2	7042	transforming growth factor beta 2
Cytokines	TGFB3	7043	transforming growth factor beta 3
Cytokines	THPO	7066	thrombopoietin
Cytokines	TNC	3371	tenascin C
Cytokines	TNF	7124	tumor necrosis factor
Cytokines	TNFRSF11B	4982	TNF receptor superfamily member 11b
Cytokines	TNFSF10	8743	TNF superfamily member 10
Cytokines	TNFSF11	8600	TNF superfamily member 11
Cytokines	TNFSF12	8742	TNF superfamily member 12
Cytokines	TNFSF13	8741	TNF superfamily member 13
Cytokines	TNFSF13B	10673	TNF superfamily member 13b
Cytokines	TNFSF14	8740	TNF superfamily member 14
Cytokines	TNFSF15	9966	TNF superfamily member 15
Cytokines	TNFSF18	8995	TNF superfamily member 18
Cytokines	TNFSF4	7292	TNF superfamily member 4
Cytokines	TNFSF8	944	TNF superfamily member 8
Cytokines	TNFSF9	8744	TNF superfamily member 9
Cytokines	TOR2A	27433	torsin family 2 member A
Cytokines	TRH	7200	thyrotropin releasing hormone
Cytokines	TSHB	7252	thyroid stimulating hormone subunit beta
Cytokines	TSLP	85480	thymic stromal lymphopoietin
Cytokines	TXLNA	200081	taxilin alpha
Cytokines	TYMP	1890	thymidine phosphorylase
Cytokines	UCN	7349	urocortin
Cytokines	UCN2	90226	urocortin 2
Cytokines	UCN3	114131	urocortin 3
Cytokines	UTS2	10911	urotensin 2
Cytokines	UTS2B	257313	urotensin 2B
Cytokines	VEGFA	7422	vascular endothelial growth factor A
Cytokines	VEGFB	7423	vascular endothelial growth factor B
Cytokines	VEGFC	7424	vascular endothelial growth factor C
Cytokines	VGF	7425	VGF nerve growth factor inducible
Cytokines	VIP	7432	vasoactive intestinal peptide
Cytokines	XCL1	6375	X-C motif chemokine ligand 1
Cytokines	XCL2	6846	X-C motif chemokine ligand 2
Cytokine Receptors	ACVR1B	91	activin A receptor type 1B
Cytokine Receptors	ACVR1C	130399	activin A receptor type 1C
Cytokine Receptors	ACVR2A	92	activin A receptor type 2A
Cytokine Receptors	ACVR2B	93	activin A receptor type 2B
Cytokine Receptors	ACVRL1	94	activin A receptor like type 1
Cytokine Receptors	ADCYAP1R1	117	ADCYAP receptor type I
Cytokine Receptors	ADIPOR1	51094	adiponectin receptor 1
Cytokine Receptors	ADIPOR2	79602	adiponectin receptor 2
Cytokine Receptors	ADRB1	153	adrenoceptor beta 1
Cytokine Receptors	ADRB2	154	adrenoceptor beta 2
Cytokine Receptors	AGTR1	185	angiotensin II receptor type 1
Cytokine Receptors	AGTR2	186	angiotensin II receptor type 2
Cytokine Receptors	AMHR2	269	anti-Mullerian hormone receptor type 2
Cytokine Receptors	ANGPT1	284	angiopoietin 1
Cytokine Receptors	ANGPT4	51378	angiopoietin 4
Cytokine Receptors	ANGPTL1	9068	angiopoietin like 1
Cytokine Receptors	ANGPTL2	23452	angiopoietin like 2
Cytokine Receptors	ANGPTL3	27329	angiopoietin like 3
Cytokine Receptors	ANGPTL4	51129	angiopoietin like 4
Cytokine Receptors	ANGPTL6	83854	angiopoietin like 6
Cytokine Receptors	APLNR	187	apelin receptor
Cytokine Receptors	AR	367	androgen receptor
Cytokine Receptors	AVPR1A	552	arginine vasopressin receptor 1A
Cytokine Receptors	AVPR1B	553	arginine vasopressin receptor 1B
Cytokine Receptors	AVPR2	554	arginine vasopressin receptor 2
Cytokine Receptors	BMPR1A	657	bone morphogenetic protein receptor type 1A
Cytokine Receptors	BMPR1B	658	bone morphogenetic protein receptor type 1B
Cytokine Receptors	BMPR2	659	bone morphogenetic protein receptor type 2
Cytokine Receptors	BRD8	10902	bromodomain containing 8
Cytokine Receptors	C3AR1	719	complement C3a receptor 1
Cytokine Receptors	C5AR1	728	complement C5a receptor 1
Cytokine Receptors	CALCR	799	calcitonin receptor
Cytokine Receptors	CALCRL	10203	calcitonin receptor like receptor
Cytokine Receptors	ACKR2	1238	atypical chemokine receptor 2
Cytokine Receptors	CCR1	1230	C-C motif chemokine receptor 1
Cytokine Receptors	CCR10	2826	C-C motif chemokine receptor 10
Cytokine Receptors	CCR3	1232	C-C motif chemokine receptor 3
Cytokine Receptors	CCR4	1233	C-C motif chemokine receptor 4
Cytokine Receptors	CCR5	1234	C-C motif chemokine receptor 5
Cytokine Receptors	CCR6	1235	C-C motif chemokine receptor 6
Cytokine Receptors	CCR7	1236	C-C motif chemokine receptor 7
Cytokine Receptors	CCR8	1237	C-C motif chemokine receptor 8
Cytokine Receptors	CCR9	10803	C-C motif chemokine receptor 9
Cytokine Receptors	ACKR4	51554	atypical chemokine receptor 4
Cytokine Receptors	CCRL2	9034	C-C motif chemokine receptor like 2
Cytokine Receptors	CD40	958	CD40 molecule
Cytokine Receptors	CMKLR1	1240	chemerin chemokine-like receptor 1
Cytokine Receptors	CNTFR	1271	ciliary neurotrophic factor receptor
Cytokine Receptors	CRHR1	1394	corticotropin releasing hormone receptor 1
Cytokine Receptors	CRHR2	1395	corticotropin releasing hormone receptor 2
Cytokine Receptors	CRIM1	51232	cysteine rich transmembrane BMP regulator 1
Cytokine Receptors	CRLF1	9244	cytokine receptor like factor 1
Cytokine Receptors	CRLF2	64109	cytokine receptor like factor 2
Cytokine Receptors	CRLF3	51379	cytokine receptor like factor 3
Cytokine Receptors	CSF1R	1436	colony stimulating factor 1 receptor
Cytokine Receptors	CSF2RA	1438	colony stimulating factor 2 receptor subunit alpha
Cytokine Receptors	CSF2RB	1439	colony stimulating factor 2 receptor subunit beta
Cytokine Receptors	CSF3R	1441	colony stimulating factor 3 receptor
Cytokine Receptors	CX3CR1	1524	C-X3-C motif chemokine receptor 1
Cytokine Receptors	CXCR3	2833	C-X-C motif chemokine receptor 3
Cytokine Receptors	CXCR4	7852	C-X-C motif chemokine receptor 4
Cytokine Receptors	CXCR5	643	C-X-C motif chemokine receptor 5
Cytokine Receptors	CXCR6	10663	C-X-C motif chemokine receptor 6
Cytokine Receptors	ACKR3	57007	atypical chemokine receptor 3
Cytokine Receptors	CYSLTR1	10800	cysteinyl leukotriene receptor 1
Cytokine Receptors	CYSLTR2	57105	cysteinyl leukotriene receptor 2
Cytokine Receptors	ACKR1	2532	atypical chemokine receptor 1 (Duffy blood group)
Cytokine Receptors	EDNRA	1909	endothelin receptor type A
Cytokine Receptors	EDNRB	1910	endothelin receptor type B
Cytokine Receptors	EGFR	1956	epidermal growth factor receptor
Cytokine Receptors	ENG	2022	endoglin
Cytokine Receptors	EPOR	2057	erythropoietin receptor
Cytokine Receptors	ESR1	2099	estrogen receptor 1
Cytokine Receptors	ESR2	2100	estrogen receptor 2
Cytokine Receptors	ESRRA	2101	estrogen related receptor alpha
Cytokine Receptors	ESRRB	2103	estrogen related receptor beta
Cytokine Receptors	ESRRG	2104	estrogen related receptor gamma
Cytokine Receptors	FGFR1	2260	fibroblast growth factor receptor 1
Cytokine Receptors	FGFR2	2263	fibroblast growth factor receptor 2
Cytokine Receptors	FGFR3	2261	fibroblast growth factor receptor 3
Cytokine Receptors	FGFR4	2264	fibroblast growth factor receptor 4
Cytokine Receptors	FGFRL1	53834	fibroblast growth factor receptor like 1
Cytokine Receptors	FLT1	2321	fms related receptor tyrosine kinase 1
Cytokine Receptors	FLT3	2322	fms related receptor tyrosine kinase 3
Cytokine Receptors	FLT4	2324	fms related receptor tyrosine kinase 4
Cytokine Receptors	FPR1	2357	formyl peptide receptor 1
Cytokine Receptors	FPR2	2358	formyl peptide receptor 2
Cytokine Receptors	FPR2	2358	formyl peptide receptor 2
Cytokine Receptors	FSHR	2492	follicle stimulating hormone receptor
Cytokine Receptors	GALR2	8811	galanin receptor 2
Cytokine Receptors	GALR3	8484	galanin receptor 3
Cytokine Receptors	GCGR	2642	glucagon receptor
Cytokine Receptors	GHR	2690	growth hormone receptor
Cytokine Receptors	GHRHR	2692	growth hormone releasing hormone receptor
Cytokine Receptors	GHSR	2693	growth hormone secretagogue receptor
Cytokine Receptors	GIPR	2696	gastric inhibitory polypeptide receptor
Cytokine Receptors	GLP1R	2740	glucagon like peptide 1 receptor
Cytokine Receptors	GLP2R	9340	glucagon like peptide 2 receptor
Cytokine Receptors	GNRHR	2798	gonadotropin releasing hormone receptor
Cytokine Receptors	GPER1	2852	G protein-coupled estrogen receptor 1
Cytokine Receptors	GPR17	2840	G protein-coupled receptor 17
Cytokine Receptors	GPR32	2854	G protein-coupled receptor 32
Cytokine Receptors	GPR33	2856	G protein-coupled receptor 33
Cytokine Receptors	PTGDR2	11251	prostaglandin D2 receptor 2
Cytokine Receptors	C5AR2	27202	complement component 5a receptor 2
Cytokine Receptors	HNF4A	3172	hepatocyte nuclear factor 4 alpha
Cytokine Receptors	HNF4G	3174	hepatocyte nuclear factor 4 gamma
Cytokine Receptors	HTR3A	3359	5-hydroxytryptamine receptor 3A
Cytokine Receptors	HTR3B	9177	5-hydroxytryptamine receptor 3B
Cytokine Receptors	HTR3C	170572	5-hydroxytryptamine receptor 3C
Cytokine Receptors	HTR3D	200909	5-hydroxytryptamine receptor 3D
Cytokine Receptors	HTR3E	285242	5-hydroxytryptamine receptor 3E
Cytokine Receptors	IFNAR1	3454	interferon alpha and beta receptor subunit 1
Cytokine Receptors	IFNAR2	3455	interferon alpha and beta receptor subunit 2
Cytokine Receptors	IFNGR1	3459	interferon gamma receptor 1
Cytokine Receptors	IFNGR2	3460	interferon gamma receptor 2
Cytokine Receptors	IGF1R	3480	insulin like growth factor 1 receptor
Cytokine Receptors	IGF2R	3482	insulin like growth factor 2 receptor
Cytokine Receptors	IL10RA	3587	interleukin 10 receptor subunit alpha
Cytokine Receptors	IL10RB	3588	interleukin 10 receptor subunit beta
Cytokine Receptors	IL11RA	3590	interleukin 11 receptor subunit alpha
Cytokine Receptors	IL12RB1	3594	interleukin 12 receptor subunit beta 1
Cytokine Receptors	IL12RB2	3595	interleukin 12 receptor subunit beta 2
Cytokine Receptors	IL13RA1	3597	interleukin 13 receptor subunit alpha 1
Cytokine Receptors	IL13RA2	3598	interleukin 13 receptor subunit alpha 2
Cytokine Receptors	IL15RA	3601	interleukin 15 receptor subunit alpha
Cytokine Receptors	IL2RB	3560	interleukin 2 receptor subunit beta
Cytokine Receptors	IL17RA	23765	interleukin 17 receptor A
Cytokine Receptors	IL17RB	55540	interleukin 17 receptor B
Cytokine Receptors	IL17RC	84818	interleukin 17 receptor C
Cytokine Receptors	IL17RD	54756	interleukin 17 receptor D
Cytokine Receptors	IL17RE	132014	interleukin 17 receptor E
Cytokine Receptors	IL18R1	8809	interleukin 18 receptor 1
Cytokine Receptors	IL18RAP	8807	interleukin 18 receptor accessory protein
Cytokine Receptors	IL1R1	3554	interleukin 1 receptor type 1
Cytokine Receptors	IL1R2	7850	interleukin 1 receptor type 2
Cytokine Receptors	IL1RAP	3556	interleukin 1 receptor accessory protein
Cytokine Receptors	IL1RL1	9173	interleukin 1 receptor like 1
Cytokine Receptors	IL1RL2	8808	interleukin 1 receptor like 2
Cytokine Receptors	IL20RA	53832	interleukin 20 receptor subunit alpha
Cytokine Receptors	IL20RB	53833	interleukin 20 receptor subunit beta
Cytokine Receptors	IL21R	50615	interleukin 21 receptor
Cytokine Receptors	IL22RA1	58985	interleukin 22 receptor subunit alpha 1
Cytokine Receptors	IL22RA2	116379	interleukin 22 receptor subunit alpha 2
Cytokine Receptors	IL23R	149233	interleukin 23 receptor
Cytokine Receptors	IL27RA	9466	interleukin 27 receptor subunit alpha
Cytokine Receptors	IFNLR1	163702	interferon lambda receptor 1
Cytokine Receptors	IL2RA	3559	interleukin 2 receptor subunit alpha
Cytokine Receptors	IL2RB	3560	interleukin 2 receptor subunit beta
Cytokine Receptors	IL2RG	3561	interleukin 2 receptor subunit gamma
Cytokine Receptors	IL31RA	133396	interleukin 31 receptor A
Cytokine Receptors	IL3RA	3563	interleukin 3 receptor subunit alpha
Cytokine Receptors	IL4R	3566	interleukin 4 receptor
Cytokine Receptors	IL5RA	3568	interleukin 5 receptor subunit alpha
Cytokine Receptors	IL6R	3570	interleukin 6 receptor
Cytokine Receptors	IL7R	3575	interleukin 7 receptor
Cytokine Receptors	CXCR1	3577	C-X-C motif chemokine receptor 1
Cytokine Receptors	CXCR2	3579	C-X-C motif chemokine receptor 2
Cytokine Receptors	IL9R	3581	interleukin 9 receptor
Cytokine Receptors	INSR	3643	insulin receptor
Cytokine Receptors	KDR	3791	kinase insert domain receptor
Cytokine Receptors	LEPR	3953	leptin receptor
Cytokine Receptors	LGR4	55366	leucine rich repeat containing G protein-coupled receptor 4
Cytokine Receptors	LGR5	8549	leucine rich repeat containing G protein-coupled receptor 5
Cytokine Receptors	LGR6	59352	leucine rich repeat containing G protein-coupled receptor 6
Cytokine Receptors	LHCGR	3973	luteinizing hormone/choriogonadotropin receptor
Cytokine Receptors	LIFR	3977	LIF receptor subunit alpha
Cytokine Receptors	LTB4R	1241	leukotriene B4 receptor
Cytokine Receptors	LTB4R2	56413	leukotriene B4 receptor 2
Cytokine Receptors	LTBR	4055	lymphotoxin beta receptor
Cytokine Receptors	MC1R	4157	melanocortin 1 receptor
Cytokine Receptors	MC2R	4158	melanocortin 2 receptor
Cytokine Receptors	MC3R	4159	melanocortin 3 receptor
Cytokine Receptors	MC4R	4160	melanocortin 4 receptor
Cytokine Receptors	MCHR1	2847	melanin concentrating hormone receptor 1
Cytokine Receptors	MCHR2	84539	melanin concentrating hormone receptor 2
Cytokine Receptors	MET	4233	MET proto-oncogene, receptor tyrosine kinase
Cytokine Receptors	MLNR	2862	motilin receptor
Cytokine Receptors	MPL	4352	MPL proto-oncogene, thrombopoietin receptor
Cytokine Receptors	MTNR1A	4543	melatonin receptor 1A
Cytokine Receptors	MTNR1B	4544	melatonin receptor 1B
Cytokine Receptors	NGFR	4804	nerve growth factor receptor
Cytokine Receptors	NMBR	4829	neuromedin B receptor
Cytokine Receptors	NPR1	4881	natriuretic peptide receptor 1
Cytokine Receptors	NPR3	4883	natriuretic peptide receptor 3
Cytokine Receptors	NR0B1	190	nuclear receptor subfamily 0 group B member 1
Cytokine Receptors	NR0B2	8431	nuclear receptor subfamily 0 group B member 2
Cytokine Receptors	NR1D1	9572	nuclear receptor subfamily 1 group D member 1
Cytokine Receptors	NR1D2	9975	nuclear receptor subfamily 1 group D member 2
Cytokine Receptors	NR1H2	7376	nuclear receptor subfamily 1 group H member 2
Cytokine Receptors	NR1H3	10062	nuclear receptor subfamily 1 group H member 3
Cytokine Receptors	NR1H4	9971	nuclear receptor subfamily 1 group H member 4
Cytokine Receptors	NR1I2	8856	nuclear receptor subfamily 1 group I member 2
Cytokine Receptors	NR1I3	9970	nuclear receptor subfamily 1 group I member 3
Cytokine Receptors	NR2C1	7181	nuclear receptor subfamily 2 group C member 1
Cytokine Receptors	NR2C2	7182	nuclear receptor subfamily 2 group C member 2
Cytokine Receptors	NR2E1	7101	nuclear receptor subfamily 2 group E member 1
Cytokine Receptors	NR2E3	10002	nuclear receptor subfamily 2 group E member 3
Cytokine Receptors	NR2F1	7025	nuclear receptor subfamily 2 group F member 1
Cytokine Receptors	NR2F2	7026	nuclear receptor subfamily 2 group F member 2
Cytokine Receptors	NR2F6	2063	nuclear receptor subfamily 2 group F member 6
Cytokine Receptors	NR3C1	2908	nuclear receptor subfamily 3 group C member 1
Cytokine Receptors	NR3C2	4306	nuclear receptor subfamily 3 group C member 2
Cytokine Receptors	NR4A1	3164	nuclear receptor subfamily 4 group A member 1
Cytokine Receptors	NR4A2	4929	nuclear receptor subfamily 4 group A member 2
Cytokine Receptors	NR4A3	8013	nuclear receptor subfamily 4 group A member 3
Cytokine Receptors	NR5A1	2516	nuclear receptor subfamily 5 group A member 1
Cytokine Receptors	NR5A2	2494	nuclear receptor subfamily 5 group A member 2
Cytokine Receptors	NR6A1	2649	nuclear receptor subfamily 6 group A member 1
Cytokine Receptors	NRP1	8829	neuropilin 1
Cytokine Receptors	NRP2	8828	neuropilin 2
Cytokine Receptors	OGFR	11054	opioid growth factor receptor
Cytokine Receptors	OPRD1	4985	opioid receptor delta 1
Cytokine Receptors	OPRK1	4986	opioid receptor kappa 1
Cytokine Receptors	OPRL1	4987	opioid related nociceptin receptor 1
Cytokine Receptors	OPRM1	4988	opioid receptor mu 1
Cytokine Receptors	OSMR	9180	oncostatin M receptor
Cytokine Receptors	OXTR	5021	oxytocin receptor
Cytokine Receptors	PGR	5241	progesterone receptor
Cytokine Receptors	PGRMC2	10424	progesterone receptor membrane component 2
Cytokine Receptors	PLAUR	5329	plasminogen activator, urokinase receptor
Cytokine Receptors	PLXNA1	5361	plexin A1
Cytokine Receptors	PLXNA2	5362	plexin A2
Cytokine Receptors	PLXNA3	55558	plexin A3
Cytokine Receptors	PLXNA4	91584	plexin A4
Cytokine Receptors	PLXNB1	5364	plexin B1
Cytokine Receptors	PLXNB2	23654	plexin B2
Cytokine Receptors	PLXNB3	5365	plexin B3
Cytokine Receptors	PLXNC1	10154	plexin C1
Cytokine Receptors	PLXND1	23129	plexin D1
Cytokine Receptors	PPARA	5465	peroxisome proliferator activated receptor alpha
Cytokine Receptors	PPARD	5467	peroxisome proliferator activated receptor delta
Cytokine Receptors	PPARG	5468	peroxisome proliferator activated receptor gamma
Cytokine Receptors	PRLHR	2834	prolactin releasing hormone receptor
Cytokine Receptors	PRLR	5618	prolactin receptor
Cytokine Receptors	PTAFR	5724	platelet activating factor receptor
Cytokine Receptors	PTGDR	5729	prostaglandin D2 receptor
Cytokine Receptors	PTGDS	5730	prostaglandin D2 synthase
Cytokine Receptors	PTGER1	5731	prostaglandin E receptor 1
Cytokine Receptors	PTGER2	5732	prostaglandin E receptor 2
Cytokine Receptors	PTGER3	5733	prostaglandin E receptor 3
Cytokine Receptors	PTGER4	5734	prostaglandin E receptor 4
Cytokine Receptors	PTGFR	5737	prostaglandin F receptor
Cytokine Receptors	PTH1R	5745	parathyroid hormone 1 receptor
Cytokine Receptors	PTH2R	5746	parathyroid hormone 2 receptor
Cytokine Receptors	RARA	5914	retinoic acid receptor alpha
Cytokine Receptors	RARB	5915	retinoic acid receptor beta
Cytokine Receptors	RARG	5916	retinoic acid receptor gamma
Cytokine Receptors	ROBO1	6091	roundabout guidance receptor 1
Cytokine Receptors	ROBO2	6092	roundabout guidance receptor 2
Cytokine Receptors	ROBO3	64221	roundabout guidance receptor 3
Cytokine Receptors	RORA	6095	RAR related orphan receptor A
Cytokine Receptors	RORB	6096	RAR related orphan receptor B
Cytokine Receptors	RORC	6097	RAR related orphan receptor C
Cytokine Receptors	RXFP1	59350	relaxin family peptide receptor 1
Cytokine Receptors	RXFP2	122042	relaxin family peptide receptor 2
Cytokine Receptors	RXFP3	51289	relaxin family peptide receptor 3
Cytokine Receptors	RXRA	6256	retinoid X receptor alpha
Cytokine Receptors	RXRB	6257	retinoid X receptor beta
Cytokine Receptors	RXRG	6258	retinoid X receptor gamma
Cytokine Receptors	S1PR1	1901	sphingosine-1-phosphate receptor 1
Cytokine Receptors	S1PR2	9294	sphingosine-1-phosphate receptor 2
Cytokine Receptors	SCTR	6344	secretin receptor
Cytokine Receptors	SDC1	6382	syndecan 1
Cytokine Receptors	SDC2	6383	syndecan 2
Cytokine Receptors	SDC3	9672	syndecan 3
Cytokine Receptors	SDC4	6385	syndecan 4
Cytokine Receptors	SORT1	6272	sortilin 1
Cytokine Receptors	SSTR1	6751	somatostatin receptor 1
Cytokine Receptors	SSTR2	6752	somatostatin receptor 2
Cytokine Receptors	SSTR5	6755	somatostatin receptor 5
Cytokine Receptors	ST2	6761	-
Cytokine Receptors	TACR1	6869	tachykinin receptor 1
Cytokine Receptors	TEK	7010	TEK receptor tyrosine kinase
Cytokine Receptors	TGFBR1	7046	transforming growth factor beta receptor 1
Cytokine Receptors	TGFBR2	7048	transforming growth factor beta receptor 2
Cytokine Receptors	TGFBR3	7049	transforming growth factor beta receptor 3
Cytokine Receptors	THRA	7067	thyroid hormone receptor alpha
Cytokine Receptors	THRB	7068	thyroid hormone receptor beta
Cytokine Receptors	TIE1	7075	tyrosine kinase with immunoglobulin like and EGF like domains 1
Cytokine Receptors	TNFRSF10A	8797	TNF receptor superfamily member 10a
Cytokine Receptors	TNFRSF10B	8795	TNF receptor superfamily member 10b
Cytokine Receptors	TNFRSF10C	8794	TNF receptor superfamily member 10c
Cytokine Receptors	TNFRSF10D	8793	TNF receptor superfamily member 10d
Cytokine Receptors	TNFRSF11A	8792	TNF receptor superfamily member 11a
Cytokine Receptors	TNFRSF12A	51330	TNF receptor superfamily member 12A
Cytokine Receptors	TNFRSF13B	23495	TNF receptor superfamily member 13B
Cytokine Receptors	TNFRSF13C	115650	TNF receptor superfamily member 13C
Cytokine Receptors	TNFRSF14	8764	TNF receptor superfamily member 14
Cytokine Receptors	TNFRSF17	608	TNF receptor superfamily member 17
Cytokine Receptors	TNFRSF18	8784	TNF receptor superfamily member 18
Cytokine Receptors	TNFRSF19	55504	TNF receptor superfamily member 19
Cytokine Receptors	TNFRSF1A	7132	TNF receptor superfamily member 1A
Cytokine Receptors	TNFRSF1B	7133	TNF receptor superfamily member 1B
Cytokine Receptors	TNFRSF21	27242	TNF receptor superfamily member 21
Cytokine Receptors	TNFRSF25	8718	TNF receptor superfamily member 25
Cytokine Receptors	TNFRSF4	7293	TNF receptor superfamily member 4
Cytokine Receptors	TNFRSF6B	8771	TNF receptor superfamily member 6b
Cytokine Receptors	TNFRSF8	943	TNF receptor superfamily member 8
Cytokine Receptors	TNFRSF9	3604	TNF receptor superfamily member 9
Cytokine Receptors	TRHR	7201	thyrotropin releasing hormone receptor
Cytokine Receptors	TSHR	7253	thyroid stimulating hormone receptor
Cytokine Receptors	TUBB3	10381	tubulin beta 3 class III
Cytokine Receptors	VDR	7421	vitamin D receptor
Cytokine Receptors	VIPR1	7433	vasoactive intestinal peptide receptor 1
Cytokine Receptors	VIPR2	7434	vasoactive intestinal peptide receptor 2
Cytokine Receptors	XCR1	2829	X-C motif chemokine receptor 1
Interferons	IFNA10	3446	interferon alpha 10
Interferons	IFNA13	3447	interferon alpha 13
Interferons	IFNA14	3448	interferon alpha 14
Interferons	IFNA16	3449	interferon alpha 16
Interferons	IFNA17	3451	interferon alpha 17
Interferons	IFNA2	3440	interferon alpha 2
Interferons	IFNA21	3452	interferon alpha 21
Interferons	IFNA4	3441	interferon alpha 4
Interferons	IFNA5	3442	interferon alpha 5
Interferons	IFNA6	3443	interferon alpha 6
Interferons	IFNA7	3444	interferon alpha 7
Interferons	IFNA8	3445	interferon alpha 8
Interferons	IFNB1	3456	interferon beta 1
Interferons	IFNE	338376	interferon epsilon
Interferons	IFNG	3458	interferon gamma
Interferons	IFNK	56832	interferon kappa
Interferons	IFNW1	3467	interferon omega 1
Interferon Receptor	IFNAR2	3455	interferon alpha and beta receptor subunit 2
Interferon Receptor	IFNGR1	3459	interferon gamma receptor 1
Interferon Receptor	IFNGR2	3460	interferon gamma receptor 2
Interleukins	IL11	3589	interleukin 11
Interleukins	IL12A	3592	interleukin 12A
Interleukins	IL12B	3593	interleukin 12B
Interleukins	IL13	3596	interleukin 13
Interleukins	IL15	3600	interleukin 15
Interleukins	IL16	3603	interleukin 16
Interleukins	IL17A	3605	interleukin 17A
Interleukins	IL17B	27190	interleukin 17B
Interleukins	IL17C	27189	interleukin 17C
Interleukins	IL17D	53342	interleukin 17D
Interleukins	IL17F	112744	interleukin 17F
Interleukins	IL18	3606	interleukin 18
Interleukins	IL19	29949	interleukin 19
Interleukins	IL1A	3552	interleukin 1 alpha
Interleukins	IL1B	3553	interleukin 1 beta
Interleukins	IL1F10	84639	interleukin 1 family member 10
Interleukins	IL36RN	26525	interleukin 36 receptor antagonist
Interleukins	IL36A	27179	interleukin 36 alpha
Interleukins	IL37	27178	interleukin 37
Interleukins	IL36B	27177	interleukin 36 beta
Interleukins	IL36G	56300	interleukin 36 gamma
Interleukins	IL1RN	3557	interleukin 1 receptor antagonist
Interleukins	IL2	3558	interleukin 2
Interleukins	IL20	50604	interleukin 20
Interleukins	IL21	59067	interleukin 21
Interleukins	IL22	50616	interleukin 22
Interleukins	IL23A	51561	interleukin 23 subunit alpha
Interleukins	IL24	11009	interleukin 24
Interleukins	IL25	64806	interleukin 25
Interleukins	IL26	55801	interleukin 26
Interleukins	IL27	246778	interleukin 27
Interleukins	IFNL2	282616	interferon lambda 2
Interleukins	IFNL3	282617	interferon lambda 3
Interleukins	IFNL1	282618	interferon lambda 1
Interleukins	IL3	3562	interleukin 3
Interleukins	IL31	386653	interleukin 31
Interleukins	IL32	9235	interleukin 32
Interleukins	IL33	90865	interleukin 33
Interleukins	IL34	146433	interleukin 34
Interleukins	IL4	3565	interleukin 4
Interleukins	IL5	3567	interleukin 5
Interleukins	IL6	3569	interleukin 6
Interleukins	IL6ST	3572	interleukin 6 signal transducer
Interleukins	IL7	3574	interleukin 7
Interleukins	CXCL8	3576	C-X-C motif chemokine ligand 8
Interleukins	IL9	3578	interleukin 9
Interleukins	TXLNA	200081	taxilin alpha
Interleukins Receptor	IL10RA	3587	interleukin 10 receptor subunit alpha
Interleukins Receptor	IL10RB	3588	interleukin 10 receptor subunit beta
Interleukins Receptor	IL11RA	3590	interleukin 11 receptor subunit alpha
Interleukins Receptor	IL12RB1	3594	interleukin 12 receptor subunit beta 1
Interleukins Receptor	IL12RB2	3595	interleukin 12 receptor subunit beta 2
Interleukins Receptor	IL13RA1	3597	interleukin 13 receptor subunit alpha 1
Interleukins Receptor	IL13RA2	3598	interleukin 13 receptor subunit alpha 2
Interleukins Receptor	IL15RA	3601	interleukin 15 receptor subunit alpha
Interleukins Receptor	IL2RB	3560	interleukin 2 receptor subunit beta
Interleukins Receptor	IL17RA	23765	interleukin 17 receptor A
Interleukins Receptor	IL17RB	55540	interleukin 17 receptor B
Interleukins Receptor	IL17RC	84818	interleukin 17 receptor C
Interleukins Receptor	IL17RD	54756	interleukin 17 receptor D
Interleukins Receptor	IL17RE	132014	interleukin 17 receptor E
Interleukins Receptor	IL18R1	8809	interleukin 18 receptor 1
Interleukins Receptor	IL18RAP	8807	interleukin 18 receptor accessory protein
Interleukins Receptor	IL1R1	3554	interleukin 1 receptor type 1
Interleukins Receptor	IL1R2	7850	interleukin 1 receptor type 2
Interleukins Receptor	IL1RAP	3556	interleukin 1 receptor accessory protein
Interleukins Receptor	IL1RL1	9173	interleukin 1 receptor like 1
Interleukins Receptor	IL1RL2	8808	interleukin 1 receptor like 2
Interleukins Receptor	IL20RA	53832	interleukin 20 receptor subunit alpha
Interleukins Receptor	IL20RB	53833	interleukin 20 receptor subunit beta
Interleukins Receptor	IL21R	50615	interleukin 21 receptor
Interleukins Receptor	IL22RA1	58985	interleukin 22 receptor subunit alpha 1
Interleukins Receptor	IL22RA2	116379	interleukin 22 receptor subunit alpha 2
Interleukins Receptor	IL23R	149233	interleukin 23 receptor
Interleukins Receptor	IL27RA	9466	interleukin 27 receptor subunit alpha
Interleukins Receptor	IFNLR1	163702	interferon lambda receptor 1
Interleukins Receptor	IL2RA	3559	interleukin 2 receptor subunit alpha
Interleukins Receptor	IL2RB	3560	interleukin 2 receptor subunit beta
Interleukins Receptor	IL2RG	3561	interleukin 2 receptor subunit gamma
Interleukins Receptor	IL31RA	133396	interleukin 31 receptor A
Interleukins Receptor	IL3RA	3563	interleukin 3 receptor subunit alpha
Interleukins Receptor	IL4R	3566	interleukin 4 receptor
Interleukins Receptor	IL5RA	3568	interleukin 5 receptor subunit alpha
Interleukins Receptor	IL6R	3570	interleukin 6 receptor
Interleukins Receptor	IL7R	3575	interleukin 7 receptor
Interleukins Receptor	CXCR1	3577	C-X-C motif chemokine receptor 1
Interleukins Receptor	CXCR2	3579	C-X-C motif chemokine receptor 2
Interleukins Receptor	IL9R	3581	interleukin 9 receptor
Interleukins Receptor	ST2	6761	-
NaturalKiller Cell Cytotoxicity	HLA-A	3105	major histocompatibility complex, class I, A
NaturalKiller Cell Cytotoxicity	HLA-B	3106	major histocompatibility complex, class I, B
NaturalKiller Cell Cytotoxicity	HLA-C	3107	major histocompatibility complex, class I, C
NaturalKiller Cell Cytotoxicity	HLA-E	3133	major histocompatibility complex, class I, E
NaturalKiller Cell Cytotoxicity	HLA-G	3135	major histocompatibility complex, class I, G
NaturalKiller Cell Cytotoxicity	KIR3DL1	3811	killer cell immunoglobulin like receptor, three Ig domains and long cytoplasmic tail 1
NaturalKiller Cell Cytotoxicity	KIR3DL2	3812	killer cell immunoglobulin like receptor, three Ig domains and long cytoplasmic tail 2
NaturalKiller Cell Cytotoxicity	KIR2DL1	3802	killer cell immunoglobulin like receptor, two Ig domains and long cytoplasmic tail 1
NaturalKiller Cell Cytotoxicity	KIR2DL2	3803	killer cell immunoglobulin like receptor, two Ig domains and long cytoplasmic tail 2
NaturalKiller Cell Cytotoxicity	KIR2DL3	3804	killer cell immunoglobulin like receptor, two Ig domains and long cytoplasmic tail 3
NaturalKiller Cell Cytotoxicity	KIR2DL4	3805	killer cell immunoglobulin like receptor, two Ig domains and long cytoplasmic tail 4
NaturalKiller Cell Cytotoxicity	KIR2DL5A	57292	killer cell immunoglobulin like receptor, two Ig domains and long cytoplasmic tail 5A
NaturalKiller Cell Cytotoxicity	KLRC1	3821	killer cell lectin like receptor C1
NaturalKiller Cell Cytotoxicity	KLRC2	3822	killer cell lectin like receptor C2
NaturalKiller Cell Cytotoxicity	KLRC3	3823	killer cell lectin like receptor C3
NaturalKiller Cell Cytotoxicity	KLRD1	3824	killer cell lectin like receptor D1
[truncated: 485 more rows]

[truncated: 1 more sheets: Table S11]
